# Supplementary material for: The T cell receptor β chain repertoire of tumor infiltrating lymphocytes improves neoantigen prediction and prioritization
Source: eLife. 2024 Oct 28;13:RP94658. doi: 10.7554/eLife.94658 (PMC11517254; doi:10.7554/eLife.94658)
Supplement: Supplementary file 1. [file elife-94658-supp1.xlsx]

## Sheet: Sheet1
Supplementary file 1a: Quality metrics of TCR sequencing
Patient ID	Total reads	% TRB	Aligned reads	Numbers of TCRβ CDR3 clonotypes
PT01	3349619	0.28	936755	433
PT02	4865550	0.294	1430024	982
PT03	4626085	0.109	503337	837
PT04	3851870	0.191	735959	1356
PT05	2824424	0.411	1159371	1637
PT06	2674863	0.134	358561	1929
PT07	2528294	0.344	870033	2432
PT08	4263920	0.862	3673401	3023
PT09	6002378	0.968	5806998	4405
PT10	3995130	0.906	3618186	4381
PT11	4899277	0.383	1875191	3258
PT12	2526869	0.237	598791	3865
PT13	4509997	0.491	2207923	4590
PT14	3663889	0.688	2520466	6070
PT15	6974381	0.939	6542454	7185
PT16	2896554	0.088	256035	4571
PT17	3563994	0.695	2475469	6963
PT18	2885908	0.525	1514867	7465
PT19	5978760	0.756	4516021	7361
PT20	7088225	0.677	4796560	10451
PT21	3924864	0.508	1991642	8438
PT22	3502917	0.967	3386629	10250
PT23	5203923	0.93	4839290	11309
PT24	2748251	0.947	2601190	12492
PT25	9498482	0.918	8718582	13960
PT26	4932653	0.804	3964850	17004
PT27	11242426	0.969	10888726	27749
PT28	2555640	0.397	1015265	1231
Mean	4.5564e+06	0.586357	2.99295e+06	6629.54
Median	3959997	0.601	2341696	4580.5
