# Supplementary material for: The T cell receptor β chain repertoire of tumor infiltrating lymphocytes improves neoantigen prediction and prioritization
Source: eLife. 2024 Oct 28;13:RP94658. doi: 10.7554/eLife.94658 (PMC11517254; doi:10.7554/eLife.94658)
Supplement: Supplementary file 2. [file elife-94658-supp2.xlsx]

## Sheet: Sheet1
Supplementary file 1b: Percentage of unique and expanded TCR clones from 28 CRC patients
No.	Sample	Group	Total_Clonotype_count	Proportion
1	PT01	>=2	268	0.61894
2	PT01	1	165	0.38106
3	PT02	>=2	567	0.57739
4	PT02	1	415	0.42261
5	PT03	>=2	298	0.35603
6	PT03	1	539	0.64397
7	PT04	>=2	595	0.43879
8	PT04	1	761	0.56121
9	PT05	>=2	749	0.45754
10	PT05	1	888	0.54246
11	PT06	>=2	660	0.34215
12	PT06	1	1269	0.65785
13	PT07	>=2	881	0.36225
14	PT07	1	1551	0.63775
15	PT08	>=2	1374	0.45452
16	PT08	1	1649	0.54548
17	PT09	>=2	2559	0.58093
18	PT09	1	1846	0.41907
19	PT10	>=2	2076	0.47386
20	PT10	1	2305	0.52614
21	PT11	>=2	946	0.29036
22	PT11	1	2312	0.70964
23	PT12	>=2	1144	0.29599
24	PT12	1	2721	0.70401
25	PT13	>=2	1777	0.38715
26	PT13	1	2813	0.61285
27	PT14	>=2	2624	0.43229
28	PT14	1	3446	0.56771
29	PT15	>=2	3739	0.52039
30	PT15	1	3446	0.47961
31	PT16	>=2	888	0.19427
32	PT16	1	3683	0.80573
33	PT17	>=2	2696	0.38719
34	PT17	1	4267	0.61281
35	PT18	>=2	2693	0.36075
36	PT18	1	4772	0.63925
37	PT19	>=2	2350	0.31925
38	PT19	1	5011	0.68075
39	PT20	>=2	5176	0.49526
40	PT20	1	5275	0.50474
41	PT21	>=2	2836	0.3361
42	PT21	1	5602	0.6639
43	PT22	>=2	4420	0.43122
44	PT22	1	5830	0.56878
45	PT23	>=2	4479	0.39606
46	PT23	1	6830	0.60394
47	PT24	>=2	5288	0.42331
48	PT24	1	7204	0.57669
49	PT25	>=2	5950	0.42622
50	PT25	1	8010	0.57378
51	PT26	>=2	7454	0.43837
52	PT26	1	9550	0.56163
53	PT27	>=2	10103	0.36409
54	PT27	1	17646	0.63591
55	PT28	>=2	520	0.42242
56	PT28	1	711	0.57758
