# Supplementary material for: The T cell receptor β chain repertoire of tumor infiltrating lymphocytes improves neoantigen prediction and prioritization
Source: eLife. 2024 Oct 28;13:RP94658. doi: 10.7554/eLife.94658 (PMC11517254; doi:10.7554/eLife.94658)
Supplement: Supplementary file 3. [file elife-94658-supp3.xlsx]

## Sheet: Sup. File 1c
Supplementary file 1c: List of Immunogenic peptides and non-immunogenic peptides from public databases
CDR3	HLA	Epitope	DataSource	Group
CASSLGNEQ	HLA-A*02:01	EAAGIGILTV	McPAS	Immunogenic peptide
CASSLGVATGEL	HLA-A*02:01	EAAGIGILTV	McPAS	Immunogenic peptide
CASSQEEGGGSWGNTIY	HLA-A*02:01	EAAGIGILTV	McPAS	Immunogenic peptide
CASSQEGLAGASQY	HLA-A*02:01	EAAGIGILTV	McPAS	Immunogenic peptide
CASSQETDIVFNOPQH	HLA-A*02:01	EAAGIGILTV	McPAS	Immunogenic peptide
CASSQGQLTDTQY	HLA-A*02:01	EAAGIGILTV	McPAS	Immunogenic peptide
CASSRTVGGPNEQ	HLA-A*02:01	EAAGIGILTV	McPAS	Immunogenic peptide
CASSTGQGWGS	HLA-A*02:01	EAAGIGILTV	McPAS	Immunogenic peptide
CSTDGQTGTGEL	HLA-A*02:01	EAAGIGILTV	McPAS	Immunogenic peptide
CASSLGSSYEQY	HLA-A*02:01	YLEPGPVTA	McPAS_VDJdb	Immunogenic peptide
CASLAGQGYNEQ	HLA-C*16:01	SAYGEPRKL	McPAS	Immunogenic peptide
CASLGAQNNEQ	HLA-C*16:01	AARAVFLAL	McPAS	Immunogenic peptide
CASRLWFWALEA	HLA-C*16:01	SAYGEPRKL	McPAS	Immunogenic peptide
CASSYSTGDEQY	HLA-C*16:01	AARAVFLAL	McPAS	Immunogenic peptide
CASSQGTSQFNEQ	HLA-A*02:01	EAAGIGILTV	McPAS	Immunogenic peptide
CASSSGQGLNIQY	HLA-A*02:01	EAAGIGILTV	McPAS	Immunogenic peptide
CASSESAGGYYNEQ	HLA-A*11:01	IVTDFSVIK	McPAS_IEDB	Immunogenic peptide
CASSFGFGSSYGYT	HLA-A*11:01	IVTDFSVIK	McPAS_IEDB	Immunogenic peptide
CASSLASATGEL	HLA-A*11:01	AVFDRKSDAK	McPAS_IEDB	Immunogenic peptide
CASSLEPGRNEKL	HLA-A*11:01	IVTDFSVIK	McPAS_IEDB	Immunogenic peptide
CASSLSRGLLNEA	HLA-A*11:01	IVTDFSVIK	McPAS_IEDB	Immunogenic peptide
CASSLTSAAGEL	HLA-A*11:01	AVFDRKSDAK	McPAS_IEDB	Immunogenic peptide
CASSPTSAAGEL	HLA-A*11:01	AVFDRKSDAK	McPAS_IEDB	Immunogenic peptide
CASSRTSATGEL	HLA-A*11:01	AVFDRKSDAK	McPAS_IEDB	Immunogenic peptide
CASSVAESPGYPPLVTEA	HLA-A*11:01	IVTDFSVIK	McPAS_IEDB	Immunogenic peptide
CASSVGDGGANTQY	HLA-A*11:01	IVTDFSVIK	McPAS_IEDB_TBA_VDJdb	Immunogenic peptide
CASSVTSATGEL	HLA-A*11:01	AVFDRKSDAK	McPAS_IEDB	Immunogenic peptide
CASSWGGAAQ	HLA-A*11:01	IVTDFSVIK	McPAS_IEDB	Immunogenic peptide
CASTTGGATGYT	HLA-A*11:01	IVTDFSVIK	McPAS_IEDB_TBA_VDJdb	Immunogenic peptide
CATGPRANTGEL	HLA-A*11:01	AVFDRKSDAK	McPAS_IEDB	Immunogenic peptide
CSASLYGRGQPQH	HLA-A*11:01	IVTDFSVIK	McPAS_IEDB_TBA_VDJdb	Immunogenic peptide
CAMREDRDNYGKNFV	HLA-A*02:01	GLCTLVAML	McPAS_IEDB	Immunogenic peptide
CASSEGNVAPGEL	HLA-A*02:01	GLCTLVAML	McPAS_IEDB	Immunogenic peptide
CASSQSPGGFQY	HLA-A*02:01	GLCTLVAML	McPAS_IEDB_VDJdb	Immunogenic peptide
CASSQSPGGTQY	HLA-A*02:01	GLCTLVAML	McPAS_IEDB_TBA_VDJdb_10X	Immunogenic peptide
CASSSGELSAGEL	HLA-A*02:01	GLCTLVAML	McPAS_IEDB	Immunogenic peptide
CASSSGSGGYYNEQ	HLA-A*02:01	GLCTLVAML	McPAS_IEDB	Immunogenic peptide
CSAQGVGGQTYNEQ	HLA-A*02:01	GLCTLVAML	McPAS_IEDB	Immunogenic peptide
CSARAGVGNTIY	HLA-A*02:01	GLCTLVAML	McPAS_IEDB_VDJdb	Immunogenic peptide
CSARDRIGNGYT	HLA-A*02:01	GLCTLVAML	McPAS_IEDB_VDJdb	Immunogenic peptide
CSARLGVGNTIY	HLA-A*02:01	GLCTLVAML	McPAS_IEDB_VDJdb	Immunogenic peptide
CSARVRSDRDVGNTIY	HLA-A*02:01	GLCTLVAML	McPAS_IEDB	Immunogenic peptide
CSASIFRDLTHNEQ	HLA-A*02:01	GLCTLVAML	McPAS_IEDB	Immunogenic peptide
CSVGTGGTNEKL	HLA-A*02:01	GLCTLVAML	McPAS_IEDB	Immunogenic peptide
CSVGTGGTNEKLF	HLA-A*02:01	GLCTLVAML	McPAS_IEDB_TBA_VDJdb_10X	Immunogenic peptide
CSVRGQGDEQ	HLA-A*02:01	GLCTLVAML	McPAS_IEDB	Immunogenic peptide
CASDSGVGNTIY	HLA-A*02:01	GLCTLVAML	McPAS_IEDB	Immunogenic peptide
CASGQSPGGTQY	HLA-A*02:01	GLCTLVAML	McPAS_IEDB	Immunogenic peptide
CASGSGVGNTIY	HLA-A*02:01	GLCTLVAML	McPAS_IEDB	Immunogenic peptide
CASRSGVGNTIY	HLA-A*02:01	GLCTLVAML	McPAS_IEDB	Immunogenic peptide
CASSFSRNTGEL	HLA-B*08:01	RAKFKQLL	McPAS_IEDB	Immunogenic peptide
CASSQSPGGTQY	HLA-A*02:01	GLCTLVAML	McPAS_IEDB_TBA_VDJdb_10X	Immunogenic peptide
CASSRGQGEQY	HLA-B*08:01	RAKFKQLL	McPAS_IEDB	Immunogenic peptide
CASSRSPGGTQY	HLA-A*02:01	GLCTLVAML	McPAS_IEDB	Immunogenic peptide
CASVSGVGNTIY	HLA-A*02:01	GLCTLVAML	McPAS_IEDB	Immunogenic peptide
CASLAPGTTNEKL	HLA-A*02:01	NLVPMVATV	McPAS	Immunogenic peptide
CASLQAGANEQ	HLA-A*02:01	NLVPMVATV	McPAS	Immunogenic peptide
CASLSGGGEQ	HLA-A*02:01	NLVPMVATV	McPAS	Immunogenic peptide
CASLVASGQETQY	HLA-A*02:01	NLVPMVATV	McPAS	Immunogenic peptide
CASGGGGFQETQY	HLA-A*02:01	GLCTLVAML	McPAS_TBA_VDJdb	Immunogenic peptide
CASSEGQVSPGEL	HLA-A*02:01	GLCTLVAML	McPAS_IEDB	Immunogenic peptide
CASSFGQQETQY	HLA-A*02:01	GLCTLVAML	McPAS_IEDB_VDJdb	Immunogenic peptide
CASSFSSGTTDTQY	HLA-A*02:01	GLCTLVAML	McPAS_IEDB_TBA_VDJdb	Immunogenic peptide
CASSKGSVAPGEL	HLA-A*02:01	GLCTLVAML	McPAS_IEDB	Immunogenic peptide
CASSLDAGDEQ	HLA-A*02:01	GLCTLVAML	McPAS	Immunogenic peptide
CASSLDVGTEA	HLA-A*02:01	GLCTLVAML	McPAS	Immunogenic peptide
CASSLRIDGTDTQY	HLA-A*02:01	GLCTLVAML	McPAS_TBA_VDJdb	Immunogenic peptide
CASSLRNSYEQ	HLA-A*02:01	GLCTLVAML	McPAS_IEDB	Immunogenic peptide
CASSLTGTFRGYT	HLA-A*02:01	GLCTLVAML	McPAS_IEDB_TBA_VDJdb	Immunogenic peptide
CASSPGLTYPGEL	HLA-A*02:01	GLCTLVAML	McPAS_IEDB	Immunogenic peptide
CASSPPSGSGFNEQ	HLA-A*02:01	GLCTLVAML	McPAS_IEDB	Immunogenic peptide
CASSQAGLAAYNEQ	HLA-A*02:01	GLCTLVAML	McPAS_IEDB	Immunogenic peptide
CASSQSPGGIA	HLA-A*02:01	GLCTLVAML	McPAS	Immunogenic peptide
CASSQSPGGTQY	HLA-A*02:01	GLCTLVAML	McPAS_IEDB_TBA_VDJdb_10X	Immunogenic peptide
CASSQSPGGYQ	HLA-A*02:01	GLCTLVAML	McPAS	Immunogenic peptide
CASSSGLLSNTGEL	HLA-A*02:01	GLCTLVAML	McPAS	Immunogenic peptide
CASSVAELAGGTDTQY	HLA-A*02:01	GLCTLVAML	McPAS_TBA_VDJdb	Immunogenic peptide
CASSVEGLRVTGEL	HLA-A*02:01	GLCTLVAML	McPAS	Immunogenic peptide
CASSVGELAGGIDTQY	HLA-A*02:01	GLCTLVAML	McPAS_TBA_VDJdb	Immunogenic peptide
CASSVVGSDEQ	HLA-A*02:01	GLCTLVAML	McPAS	Immunogenic peptide
CSAGTGGTNEQ	HLA-A*02:01	GLCTLVAML	McPAS	Immunogenic peptide
CSAMAGGLRIYNEQ	HLA-A*02:01	GLCTLVAML	McPAS	Immunogenic peptide
CSARDGTGNGYT	HLA-A*02:01	GLCTLVAML	McPAS_IEDB_TBA_VDJdb	Immunogenic peptide
CSARDGTGNGYYT	HLA-A*02:01	GLCTLVAML	McPAS	Immunogenic peptide
CSARDRGLGNTIY	HLA-A*02:01	GLCTLVAML	McPAS_IEDB_TBA_VDJdb	Immunogenic peptide
CSARDRSLGNTIY	HLA-A*02:01	GLCTLVAML	McPAS_IEDB_TBA_VDJdb	Immunogenic peptide
CSARDRTGNTIY	HLA-A*02:01	GLCTLVAML	McPAS_IEDB_TBA_VDJdb	Immunogenic peptide
CSARDRVGNTIY	HLA-A*02:01	GLCTLVAML	McPAS_IEDB_TBA_VDJdb	Immunogenic peptide
CSARDSTGNGYT	HLA-A*02:01	GLCTLVAML	McPAS_IEDB_TBA_VDJdb_10X	Immunogenic peptide
CSVAGLTTIEQ	HLA-A*02:01	GLCTLVAML	McPAS	Immunogenic peptide
CSVEAGGRIYNEQ	HLA-A*02:01	GLCTLVAML	McPAS	Immunogenic peptide
CSVEAGGSIYNEQ	HLA-A*02:01	GLCTLVAML	McPAS	Immunogenic peptide
CSVGAAGTNEKL	HLA-A*02:01	GLCTLVAML	McPAS	Immunogenic peptide
CSVGSEGTNEQ	HLA-A*02:01	GLCTLVAML	McPAS	Immunogenic peptide
CSVGTGGTNEQ	HLA-A*02:01	GLCTLVAML	McPAS	Immunogenic peptide
CASSHRDSGNTIY	HLA-A*02:01	NLVPMVATV	McPAS	Immunogenic peptide
CASSSANYGYT	HLA-A*02:01	NLVPMVATV	McPAS_IEDB_TBA_VDJdb	Immunogenic peptide
CATSDPLTASYEQ	HLA-A*02:01	NLVPMVATV	McPAS_IEDB	Immunogenic peptide
CACSLRSQGTDTQY	HLA-A*02:01	NLVPMVATV	McPAS_IEDB	Immunogenic peptide
CASSAWDRSSGANVLT	HLA-A*02:01	NLVPMVATV	McPAS_IEDB_TBA	Immunogenic peptide
CASSELGGAGTGEL	HLA-A*02:01	NLVPMVATV	McPAS_IEDB	Immunogenic peptide
CASSETGATNYGYTG	HLA-A*02:01	NLVPMVATV	McPAS_IEDB_TBA	Immunogenic peptide
CASSFLQVTEA	HLA-A*02:01	NLVPMVATV	McPAS_IEDB	Immunogenic peptide
CASSFQGYTEA	HLA-A*02:01	NLVPMVATV	McPAS_IEDB	Immunogenic peptide
CASSFQTGASYGYT	HLA-A*02:01	NLVPMVATV	McPAS_IEDB_TBA_VDJdb	Immunogenic peptide
CASSLAPGATNEKL	HLA-A*02:01	NLVPMVATV	McPAS_IEDB	Immunogenic peptide
CASSLEGYTEA	HLA-A*02:01	NLVPMVATV	McPAS_IEDB	Immunogenic peptide
CASSLFVGGPGNEQ	HLA-A*02:01	NLVPMVATV	McPAS_IEDB	Immunogenic peptide
CASSLQTGATFNYGYT	HLA-A*02:01	NLVPMVATV	McPAS_IEDB_TBA_VDJdb	Immunogenic peptide
CASSPKLQGAWAEKL	HLA-A*02:01	NLVPMVATV	McPAS_IEDB	Immunogenic peptide
CASSPPAGSYNEQ	HLA-A*02:01	NLVPMVATV	McPAS_IEDB	Immunogenic peptide
CASSPQTGTIYGYTG	HLA-A*02:01	NLVPMVATV	McPAS_IEDB_TBA	Immunogenic peptide
CASSPVAGGAYNEQ	HLA-A*02:01	NLVPMVATV	McPAS_IEDB	Immunogenic peptide
CASSPVTGGIYGYTG	HLA-A*02:01	NLVPMVATV	McPAS_IEDB_TBA	Immunogenic peptide
CASSPWTGTLNTEA	HLA-A*02:01	NLVPMVATV	McPAS_IEDB	Immunogenic peptide
CASSQDPFAVLNTEA	HLA-A*02:01	NLVPMVATV	McPAS_IEDB	Immunogenic peptide
CASSSAFYGYT	HLA-A*02:01	NLVPMVATV	McPAS_IEDB_TBA_VDJdb	Immunogenic peptide
CASSSAHYGYT	HLA-A*02:01	NLVPMVATV	McPAS_IEDB_TBA_VDJdb	Immunogenic peptide
CASSSANYGYT	HLA-A*02:01	NLVPMVATV	McPAS_IEDB_TBA_VDJdb	Immunogenic peptide
CASSVGLPYEQY	HLA-A*02:01	NLVPMVATV	McPAS_IEDB_TBA	Immunogenic peptide
CASSYQTGAGGYGYTG	HLA-A*02:01	NLVPMVATV	McPAS_IEDB_TBA	Immunogenic peptide
CASSYSTGAGETQY	HLA-A*02:01	NLVPMVATV	McPAS_IEDB_TBA_VDJdb	Immunogenic peptide
CASSYVTGTGSYGYTG	HLA-A*02:01	NLVPMVATV	McPAS_IEDB_TBA	Immunogenic peptide
CASTGTSGALYNEQ	HLA-A*02:01	NLVPMVATV	McPAS_IEDB	Immunogenic peptide
CATSDLKVHSGNYGYT	HLA-A*02:01	NLVPMVATV	McPAS_IEDB_TBA_VDJdb	Immunogenic peptide
CAWSSRDSMTDTQY	HLA-A*02:01	NLVPMVATV	McPAS_IEDB_TBA	Immunogenic peptide
CAWSSRGQMTDTQY	HLA-A*02:01	NLVPMVATV	McPAS_IEDB_TBA	Immunogenic peptide
CAWSVSDLAKNIQY	HLA-A*02:01	NLVPMVATV	McPAS_IEDB_TBA_VDJdb	Immunogenic peptide
CSAFSGAAFVTDTQY	HLA-A*02:01	NLVPMVATV	McPAS_IEDB_TBA	Immunogenic peptide
CANSYATGIGNYGYT	HLA-A*02:01	NLVPMVATV	McPAS_IEDB_VDJdb	Immunogenic peptide
CASHYGGSSYEQY	HLA-A*02:01	NLVPMVATV	McPAS_IEDB_VDJdb	Immunogenic peptide
CASNPGTSNEQ	HLA-A*02:01	GLCTLVAML	McPAS_IEDB	Immunogenic peptide
CASNPSGGYTGEL	HLA-A*02:01	NLVPMVATV	McPAS_IEDB	Immunogenic peptide
CASSALGGGGTGEL	HLA-A*02:01	NLVPMVATV	McPAS_IEDB	Immunogenic peptide
CASSESMIQH	HLA-A*02:01	NLVPMVATV	McPAS_IEDB_VDJdb	Immunogenic peptide
CASSEVGATNYGYT	HLA-A*02:01	NLVPMVATV	McPAS_IEDB_VDJdb	Immunogenic peptide
CASSFAGGAAGEL	HLA-A*02:01	NLVPMVATV	McPAS_IEDB	Immunogenic peptide
CASSFFSKKYNNEQ	HLA-A*02:01	NLVPMVATV	McPAS_IEDB	Immunogenic peptide
CASSFGLNQPQH	HLA-A*02:01	NLVPMVATV	McPAS_IEDB_VDJdb	Immunogenic peptide
CASSFGTGHTGEL	HLA-A*02:01	NLVPMVATV	McPAS_IEDB	Immunogenic peptide
CASSFSGGAPGEL	HLA-A*02:01	NLVPMVATV	McPAS_IEDB	Immunogenic peptide
CASSFWREPTYEQY	HLA-A*02:01	NLVPMVATV	McPAS_IEDB_VDJdb	Immunogenic peptide
CASSLAPGATNEKL	HLA-A*02:01	NLVPMVATV	McPAS_IEDB	Immunogenic peptide
CASSLAPGATSEKL	HLA-A*02:01	NLVPMVATV	McPAS_IEDB	Immunogenic peptide
CASSLAPGTTNEKL	HLA-A*02:01	NLVPMVATV	McPAS_IEDB	Immunogenic peptide
CASSLEGFTEA	HLA-A*02:01	NLVPMVATV	McPAS_IEDB	Immunogenic peptide
CASSLEGYTEA	HLA-A*02:01	NLVPMVATV	McPAS_IEDB	Immunogenic peptide
CASSLGGGGFYEQY	HLA-A*02:01	NLVPMVATV	McPAS_IEDB_TBA_VDJdb	Immunogenic peptide
CASSLLIQGGENTEA	HLA-A*02:01	NLVPMVATV	McPAS_IEDB	Immunogenic peptide
CASSLQTGVRSYEQY	HLA-A*02:01	NLVPMVATV	McPAS_IEDB_TBA_VDJdb	Immunogenic peptide
CASSLSPTSGLSYEQY	HLA-A*02:01	NLVPMVATV	McPAS_IEDB_VDJdb	Immunogenic peptide
CASSLTTGTGSYGYT	HLA-A*02:01	NLVPMVATV	McPAS_IEDB_VDJdb	Immunogenic peptide
CASSLVGGRYGYT	HLA-A*02:01	NLVPMVATV	McPAS_IEDB_TBA_VDJdb	Immunogenic peptide
CASSLVSGSPTGEL	HLA-A*02:01	NLVPMVATV	McPAS_IEDB	Immunogenic peptide
CASSPGSINYGYT	HLA-A*02:01	NLVPMVATV	McPAS_IEDB_VDJdb	Immunogenic peptide
CASSPGTGHGEL	HLA-A*02:01	NLVPMVATV	McPAS_IEDB	Immunogenic peptide
CASSPQTGAIYGYT	HLA-A*02:01	NLVPMVATV	McPAS_IEDB_VDJdb	Immunogenic peptide
CASSPRQGGKQPQH	HLA-A*02:01	NLVPMVATV	McPAS_IEDB_VDJdb	Immunogenic peptide
CASSPVQGAFYNSPLH	HLA-A*02:01	NLVPMVATV	McPAS_IEDB_VDJdb	Immunogenic peptide
CASSQADRAVYGYT	HLA-A*02:01	NLVPMVATV	McPAS_IEDB_VDJdb	Immunogenic peptide
CASSRPGQGGYEQY	HLA-A*02:01	NLVPMVATV	McPAS_IEDB_VDJdb	Immunogenic peptide
CASSSAHYGYT	HLA-A*02:01	NLVPMVATV	McPAS_IEDB_TBA_VDJdb	Immunogenic peptide
CASSSAYYGYT	HLA-A*02:01	NLVPMVATV	McPAS_IEDB_TBA_VDJdb	Immunogenic peptide
CASSSLGGAGTGEL	HLA-A*02:01	NLVPMVATV	McPAS_IEDB	Immunogenic peptide
CASSSLYGDTGEL	HLA-A*02:01	NLVPMVATV	McPAS_IEDB	Immunogenic peptide
CASSSVTEA	HLA-A*02:01	NLVPMVATV	McPAS_IEDB	Immunogenic peptide
CASSTPWGGTSGATDTQY	HLA-A*02:01	NLVPMVATV	McPAS_IEDB_VDJdb	Immunogenic peptide
CASSVQGYTEA	HLA-A*02:01	NLVPMVATV	McPAS_IEDB	Immunogenic peptide
CASSVVNEQ	HLA-A*02:01	NLVPMVATV	McPAS_IEDB	Immunogenic peptide
CASSWLMGTTYNEQ	HLA-A*02:01	NLVPMVATV	McPAS_IEDB	Immunogenic peptide
CASSYATGIGNYGYT	HLA-A*02:01	NLVPMVATV	McPAS_IEDB_VDJdb	Immunogenic peptide
CASSYFGGNTEA	HLA-A*02:01	NLVPMVATV	McPAS_IEDB	Immunogenic peptide
CASSYFGSQSEQY	HLA-A*02:01	NLVPMVATV	McPAS_IEDB_VDJdb	Immunogenic peptide
CASSYFPLADTQY	HLA-A*02:01	NLVPMVATV	McPAS_IEDB_VDJdb	Immunogenic peptide
CASSYQTGAIYGYT	HLA-A*02:01	NLVPMVATV	McPAS_IEDB_TBA_VDJdb	Immunogenic peptide
CASSYQTGTIYGYT	HLA-A*02:01	NLVPMVATV	McPAS_IEDB_TBA_VDJdb	Immunogenic peptide
CASSYSTGTPGIYT	HLA-A*02:01	NLVPMVATV	McPAS_IEDB_VDJdb	Immunogenic peptide
CASTPAGGAPGEL	HLA-A*02:01	NLVPMVATV	McPAS_IEDB	Immunogenic peptide
CATSRDLVAETQY	HLA-A*02:01	NLVPMVATV	McPAS_IEDB_VDJdb	Immunogenic peptide
CAWIPGTGGAGGL	HLA-A*02:01	NLVPMVATV	McPAS_IEDB	Immunogenic peptide
CAWSVSDIMNTEA	HLA-A*02:01	NLVPMVATV	McPAS_IEDB	Immunogenic peptide
CSARDFDRTGEL	HLA-A*02:01	NLVPMVATV	McPAS_IEDB	Immunogenic peptide
CSARDPLDYVRTDTQY	HLA-A*02:01	NLVPMVATV	McPAS_IEDB_VDJdb	Immunogenic peptide
CSARVGVGNTIY	HLA-A*02:01	GLCTLVAML	McPAS_IEDB_TBA_VDJdb	Immunogenic peptide
CSVDETGGGETQY	HLA-A*02:01	NLVPMVATV	McPAS_IEDB_VDJdb	Immunogenic peptide
CSVDRYGGDTYEQY	HLA-A*02:01	NLVPMVATV	McPAS_IEDB_VDJdb	Immunogenic peptide
CSVGGTLDTQY	HLA-A*02:01	NLVPMVATV	McPAS_IEDB_TBA_VDJdb	Immunogenic peptide
CSVGSGGTNEKL	HLA-A*02:01	GLCTLVAML	McPAS_IEDB	Immunogenic peptide
CSVQEGNYGYT	HLA-A*02:01	GLCTLVAML	McPAS	Immunogenic peptide
CASRYRDDSYNEQ	HLA-B*44:05	EENLLDFVRF	McPAS	Immunogenic peptide
CASSLGQAYEQY	HLA-B*44:05	EENLLDFVRF	McPAS	Immunogenic peptide
CAAGGQFYGYT	HLA-B*57:01	KAFSPEVIPMF	McPAS_TBA_VDJdb	Immunogenic peptide
CAGSLSNGYT	HLA-B*57:03	KAFSPEVIPMF	McPAS_TBA	Immunogenic peptide
CAGTGTAYGYT	HLA-B*57:01	KAFSPEVIPMF	McPAS_TBA_VDJdb	Immunogenic peptide
CANSSFLSSGETQY	HLA-B*57:01	KAFSPEVIPMF	McPAS_TBA_VDJdb	Immunogenic peptide
CASEAGNTIY	HLA-B*57:03	KAFSPEVIPMF	McPAS_TBA	Immunogenic peptide
CASEDSSDGANYGYT	HLA-B*57:03	KAFSPEVIPMF	McPAS_TBA	Immunogenic peptide
CASNSREVYGYT	HLA-B*57:01	KAFSPEVIPMF	McPAS_TBA_VDJdb	Immunogenic peptide
CASSATYGYT	HLA-B*57:01	KAFSPEVIPMF	McPAS_TBA_VDJdb	Immunogenic peptide
CASSESRMGSQANYGYT	HLA-B*57:03	KAFSPEVIPMF	McPAS_TBA	Immunogenic peptide
CASSFLLDGYT	HLA-B*57:03	KAFSPEVIPMF	McPAS_TBA	Immunogenic peptide
CASSGGSYGYT	HLA-B*57:01	KAFSPEVIPMF	McPAS_TBA_VDJdb	Immunogenic peptide
CASSGLGGYT	HLA-B*57:03	KAFSPEVIPMF	McPAS_TBA	Immunogenic peptide
CASSGQDYGYT	HLA-B*57:01	KAFSPEVIPMF	McPAS_TBA_VDJdb	Immunogenic peptide
CASSGQEYGYT	HLA-B*57:01	KAFSPEVIPMF	McPAS_TBA_VDJdb	Immunogenic peptide
CASSGQGGYT	HLA-B*57:01	KAFSPEVIPMF	McPAS_TBA_VDJdb	Immunogenic peptide
CASSGQGYGYA	HLA-B*57:01	KAFSPEVIPMF	McPAS_TBA	Immunogenic peptide
CASSGQLYGYT	HLA-B*57:01	KAFSPEVIPMF	McPAS_TBA_VDJdb	Immunogenic peptide
CASSGQNYGYT	HLA-B*57:01	KAFSPEVIPMF	McPAS_TBA_VDJdb	Immunogenic peptide
CASSGQNYGYT	HLA-B*57:03	KAFSPEVIPMF	McPAS_TBA	Immunogenic peptide
CASSGQSYGYA	HLA-B*57:01	KAFSPEVIPMF	McPAS_TBA	Immunogenic peptide
CASSGRNYGYT	HLA-B*57:01	KAFSPEVIPMF	McPAS_TBA_VDJdb	Immunogenic peptide
CASSGTASFDEQ	HLA-B*57:03	KAFSPEVIPMF	McPAS_TBA	Immunogenic peptide
CASSGTSYGYT	HLA-B*57:03	KAFSPEVIPMF	McPAS_TBA	Immunogenic peptide
CASSGTTSFDEQ	HLA-B*57:03	KAFSPEVIPMF	McPAS_TBA	Immunogenic peptide
CASSLAETSADGYT	HLA-B*57:01	KAFSPEVIPMF	McPAS_TBA_VDJdb	Immunogenic peptide
CASSLAGGQETQY	HLA-B*57:03	KAFSPEVIPMF	McPAS_TBA	Immunogenic peptide
CASSLAGTHETQY	HLA-B*57:03	KAFSPEVIPMF	McPAS_TBA	Immunogenic peptide
CASSLAGTQETQY	HLA-B*57:03	KAFSPEVIPMF	McPAS_TBA	Immunogenic peptide
CASSLAGTQETQY	HLA-B*57:01	KAFSPEVIPMF	McPAS_TBA_VDJdb	Immunogenic peptide
CASSLGASISYEQY	HLA-B*57:03	KAFSPEVIPMF	McPAS_TBA	Immunogenic peptide
CASSLTAPDTDA	HLA-B*57:01	KAFSPEVIPMF	McPAS_TBA	Immunogenic peptide
CASSLVSNYGYT	HLA-B*57:03	KAFSPEVIPMF	McPAS_TBA	Immunogenic peptide
CASSPDRARDGYT	HLA-B*57:03	KAFSPEVIPMF	McPAS_TBA	Immunogenic peptide
CASSPRDSKETQY	HLA-B*57:03	KAFSPEVIPMF	McPAS_TBA	Immunogenic peptide
CASSPYAGSEQ	HLA-B*57:03	KAFSPEVIPMF	McPAS_TBA	Immunogenic peptide
CASSQLGQSTDTQY	HLA-B*57:03	KAFSPEVIPMF	McPAS_TBA	Immunogenic peptide
CASSQRQDSSYNEQ	HLA-B*57:03	KAFSPEVIPMF	McPAS_TBA	Immunogenic peptide
CASSREVYGYT	HLA-B*57:01	KAFSPEVIPMF	McPAS_TBA_VDJdb	Immunogenic peptide
CASSRQGFT	HLA-B*57:03	KAFSPEVIPMF	McPAS_TBA	Immunogenic peptide
CASSSAGTQETQY	HLA-B*57:03	KAFSPEVIPMF	McPAS_TBA	Immunogenic peptide
CASSSDRARDGYT	HLA-B*57:03	KAFSPEVIPMF	McPAS_TBA	Immunogenic peptide
CASSSFLSSGETQY	HLA-B*57:01	KAFSPEVIPMF	McPAS_TBA_VDJdb	Immunogenic peptide
CASSSLIRGLGNQPQH	HLA-B*57:03	KAFSPEVIPMF	McPAS_TBA	Immunogenic peptide
CASSSRQNYGYT	HLA-B*57:01	KAFSPEVIPMF	McPAS_TBA_VDJdb	Immunogenic peptide
CASSSWEGLDTQY	HLA-B*57:03	KAFSPEVIPMF	McPAS_TBA	Immunogenic peptide
CASSTSYGYT	HLA-B*57:01	KAFSPEVIPMF	McPAS_TBA_VDJdb	Immunogenic peptide
CASSVGEGFDIQY	HLA-B*57:03	KAFSPEVIPMF	McPAS_TBA	Immunogenic peptide
CASSWSGGQRGYT	HLA-B*57:03	KAFSPEVIPMF	McPAS_TBA	Immunogenic peptide
CASSYSDGNEA	HLA-B*57:03	KAFSPEVIPMF	McPAS_TBA	Immunogenic peptide
CASTASYGYT	HLA-B*57:03	KAFSPEVIPMF	McPAS_TBA	Immunogenic peptide
CASTDSYGYT	HLA-B*57:01	KAFSPEVIPMF	McPAS_TBA_VDJdb	Immunogenic peptide
CASTGGGYGYT	HLA-B*57:01	KAFSPEVIPMF	McPAS_TBA_VDJdb	Immunogenic peptide
CASTGGQYGYT	HLA-B*57:03	KAFSPEVIPMF	McPAS_TBA	Immunogenic peptide
CASTGGSYGYT	HLA-B*57:03	KAFSPEVIPMF	McPAS_TBA	Immunogenic peptide
CASTGSGYGYT	HLA-B*57:01	KAFSPEVIPMF	McPAS_TBA_VDJdb	Immunogenic peptide
CASTGTAYGYT	HLA-B*57:01	KAFSPEVIPMF	McPAS_TBA_VDJdb	Immunogenic peptide
CASTGTDYGYT	HLA-B*57:01	KAFSPEVIPMF	McPAS_TBA_VDJdb	Immunogenic peptide
CATSDLGAGTSGTGEL	HLA-B*57:01	KAFSPEVIPMF	McPAS_TBA	Immunogenic peptide
CATSDLRGGK	HLA-B*57:03	KAFSPEVIPMF	McPAS_TBA	Immunogenic peptide
CATSGEGQGGPYGYT	HLA-B*57:03	KAFSPEVIPMF	McPAS_TBA	Immunogenic peptide
CATTDTYGYT	HLA-B*57:01	KAFSPEVIPMF	McPAS_TBA_VDJdb	Immunogenic peptide
CATTGSYGYT	HLA-B*57:01	KAFSPEVIPMF	McPAS_TBA_VDJdb	Immunogenic peptide
CATTGTYGYT	HLA-B*57:01	KAFSPEVIPMF	McPAS_TBA_VDJdb	Immunogenic peptide
CAWTGTNYGYT	HLA-B*57:01	KAFSPEVIPMF	McPAS_TBA_VDJdb	Immunogenic peptide
CSARAGTKTYEQY	HLA-B*57:03	KAFSPEVIPMF	McPAS_TBA	Immunogenic peptide
CSARLRDRGYEQY	HLA-B*57:03	KAFSPEVIPMF	McPAS_TBA	Immunogenic peptide
CSARPGQGTVALH	HLA-B*57:03	KAFSPEVIPMF	McPAS_TBA	Immunogenic peptide
CSARPQGQTVALH	HLA-B*57:03	KAFSPEVIPMF	McPAS_TBA	Immunogenic peptide
CSVEDPDRPSYGYT	HLA-B*57:03	KAFSPEVIPMF	McPAS_TBA	Immunogenic peptide
CSVKGQGDTEL	HLA-B*57:03	KAFSPEVIPMF	McPAS_TBA	Immunogenic peptide
CVSEDSSDGANYGYT	HLA-B*57:03	KAFSPEVIPMF	McPAS_TBA	Immunogenic peptide
CVSSESRMGSQANYGYT	HLA-B*57:03	KAFSPEVIPMF	McPAS_TBA	Immunogenic peptide
CVSSLAGTQETQY	HLA-B*57:03	KAFSPEVIPMF	McPAS_TBA	Immunogenic peptide
CAASTSAVLGKKGSQETQY	HLA-B*57:01	KAFSPEVIPMF	McPAS_IEDB_TBA_VDJdb	Immunogenic peptide
CAIGGHDYGYT	HLA-B*57:01	KAFSPEVIPMF	McPAS_IEDB_TBA_VDJdb	Immunogenic peptide
CALTGGDYGYT	HLA-B*57:01	KAFSPEVIPMF	McPAS_IEDB_TBA_VDJdb	Immunogenic peptide
CASEDFKNIQY	HLA-B*57:03	KAFSPEVIPMF	McPAS	Immunogenic peptide
CASEGGNTIY	HLA-B*57:01	KAFSPEVIPMF	McPAS_IEDB_VDJdb	Immunogenic peptide
CASEITRDRRNTIY	HLA-B*57:01	KAFSPEVIPMF	McPAS_IEDB_VDJdb	Immunogenic peptide
CASELSGNTIY	HLA-B*57:01	KAFSPEVIPMF	McPAS_IEDB_VDJdb	Immunogenic peptide
CASGGANYGYT	HLA-B*57:01	KAFSPEVIPMF	McPAS_VDJdb	Immunogenic peptide
CASGGEFYGYT	HLA-B*57:01	KAFSPEVIPMF	McPAS_IEDB_TBA_VDJdb	Immunogenic peptide
CASILTSGRNEQ	HLA-B*57:01	KAFSPEVIPMF	McPAS	Immunogenic peptide
CASMGLAQETQY	HLA-B*57:03	RAFSPEVIPMF	McPAS	Immunogenic peptide
CASPHPDRPNYGYT	HLA-B*57:01	KAFSPEVIPMF	McPAS_IEDB_TBA_VDJdb	Immunogenic peptide
CASRGGSGEL	HLA-B*57:01	RAFSPEVIPMF	McPAS	Immunogenic peptide
CASRKGQGDWEA	HLA-B*57:01	KAFSPEVIPMF	McPAS	Immunogenic peptide
CASSDGQGRLGYT	HLA-B*57:03	KAFSPEVIPMF	McPAS	Immunogenic peptide
CASSDGTGVGLGYT	HLA-B*57:03	KAFSPEVIPMF	McPAS	Immunogenic peptide
CASSFWGQGTDTQY	HLA-B*57:03	KAFSPEVIPMF	McPAS	Immunogenic peptide
CASSGFRDRVNEQY	HLA-B*57:01	RAFSPEVIPMF	McPAS	Immunogenic peptide
CASSGFTGFANEA	HLA-B*57:01	KAFSPEVIPMF	McPAS	Immunogenic peptide
CASSGPGGEQY	HLA-B*57:01	KAFSPEVIPMF	McPAS_IEDB_TBA_VDJdb	Immunogenic peptide
CASSLAGGYT	HLA-B*57:03	KAFSPEVIPMF	McPAS	Immunogenic peptide
CASSLGGGQNGYT	HLA-B*57:03	KAFSPEVIPMF	McPAS	Immunogenic peptide
CASSLGGGYT	HLA-B*57:03	KAFSPEVIPMF	McPAS	Immunogenic peptide
CASSLGLDETQY	HLA-B*57:01	KAFSPEVIPMF	McPAS_VDJdb	Immunogenic peptide
CASSLIAGGGEDTQY	HLA-B*57:01	KAFSPEVIPMF	McPAS_VDJdb	Immunogenic peptide
CASSLNSKVSSSYEQY	HLA-B*57:01	KAFSPEVIPMF	McPAS_VDJdb	Immunogenic peptide
CASSLTYGYT	HLA-B*57:01	KAFSPEVIPMF	McPAS_IEDB_TBA_VDJdb	Immunogenic peptide
CASSPGQTNYGYT	HLA-B*57:03	KAFSPEVIPMF	McPAS	Immunogenic peptide
CASSPMDLLDEQY	HLA-B*57:01	KAFSPEVIPMF	McPAS_IEDB_TBA_VDJdb	Immunogenic peptide
CASSPRDSQETQY	HLA-B*57:03	KAFSPEVIPMF	McPAS	Immunogenic peptide
CASSQGVTTGGFLNYGYT	HLA-B*57:03	RAFSPEVIPMF	McPAS	Immunogenic peptide
CASSSLVNTGEL	HLA-B*57:01	KAFSPEVIPMF	McPAS_TBA	Immunogenic peptide
CASSSMGGGTDTQY	HLA-B*57:03	KAFSPEVIPMF	McPAS	Immunogenic peptide
CASSSRTGGYGYT	HLA-B*57:01	KAFSPEVIPMF	McPAS_IEDB_TBA_VDJdb	Immunogenic peptide
CASSSWTGQDEQ	HLA-B*57:01	KAFSPEVIPMF	McPAS	Immunogenic peptide
CASSYLNTIY	HLA-B*57:01	KAFSPEVIPMF	McPAS_IEDB_VDJdb	Immunogenic peptide
CASTDTGDYGYT	HLA-B*57:03	RAFSPEVIPMF	McPAS	Immunogenic peptide
CASTDTGYYGYT	HLA-B*57:03	RAFSPEVIPMF	McPAS	Immunogenic peptide
CASYNFGQYGYT	HLA-B*57:01	KAFSPEVIPMF	McPAS_IEDB_TBA_VDJdb	Immunogenic peptide
CATEASGNTIY	HLA-B*57:01	KAFSPEVIPMF	McPAS_IEDB_VDJdb	Immunogenic peptide
CATPGEVLSPNYGYT	HLA-B*57:03	KAFSPEVIPMF	McPAS	Immunogenic peptide
CATSDLMDNEQ	HLA-B*57:01	KAFSPEVIPMF	McPAS	Immunogenic peptide
CATSDRMDNEQ	HLA-B*57:01	KAFSPEVIPMF	McPAS_TBA	Immunogenic peptide
CSAREKGSQETQY	HLA-B*57:01	KAFSPEVIPMF	McPAS_IEDB_TBA_VDJdb	Immunogenic peptide
CSARGWVSNNRETQY	HLA-B*57:01	KAFSPEVIPMF	McPAS_IEDB_TBA_VDJdb	Immunogenic peptide
CASSEGRVSPGEL	HLA-A*02:01	GLCTLVAML	McPAS_IEDB	Immunogenic peptide
CASSFQGYTEA	HLA-A*02:01	NLVPMVATV	McPAS_IEDB	Immunogenic peptide
CASSLTSGSPYNEQ	HLA-A*02:01	NLVPMVATV	McPAS_IEDB	Immunogenic peptide
CSARDQTGNGYT	HLA-A*02:01	GLCTLVAML	McPAS_IEDB_VDJdb	Immunogenic peptide
CSARDRIGNGYT	HLA-A*02:01	GLCTLVAML	McPAS_IEDB_VDJdb	Immunogenic peptide
CSARDRTGNGYT	HLA-A*02:01	GLCTLVAML	McPAS_IEDB_TBA_VDJdb_10X	Immunogenic peptide
CSARIGVGNTIY	HLA-A*02:01	GLCTLVAML	McPAS_IEDB_TBA_VDJdb	Immunogenic peptide
CSARSGVGNTIY	HLA-A*02:01	GLCTLVAML	McPAS_IEDB_TBA_VDJdb	Immunogenic peptide
CSARVGVGNTIY	HLA-A*02:01	GLCTLVAML	McPAS_IEDB_TBA_VDJdb	Immunogenic peptide
CSSQEGGYGYT	HLA-A*02:01	GLCTLVAML	McPAS_IEDB_TBA_VDJdb	Immunogenic peptide
CSVGTGGTNEKL	HLA-A*02:01	GLCTLVAML	McPAS_IEDB	Immunogenic peptide
CASIWAGLGQPQH	HLA-A*02:01	EAAGIGILTV	McPAS	Immunogenic peptide
CASQSGFLSNSPLH	HLA-A*02:01	EAAGIGILTV	McPAS	Immunogenic peptide
CASRDGTLSYNEQ	HLA-A*02:01	EAAGIGILTV	McPAS	Immunogenic peptide
CASRLATLVGNEQ	HLA-A*02:01	EAAGIGILTV	McPAS	Immunogenic peptide
CASRQQGLGSPLH	HLA-A*02:01	EAAGIGILTV	McPAS	Immunogenic peptide
CASRSGSLNTEA	HLA-A*02:01	EAAGIGILTV	McPAS	Immunogenic peptide
CASRWGQLTNYGYT	HLA-A*02:01	EAAGIGILTV	McPAS	Immunogenic peptide
CASRYQGLGQPQH	HLA-A*02:01	EAAGIGILTV	McPAS	Immunogenic peptide
CASSATGADQPQH	HLA-A*02:01	EAAGIGILTV	McPAS	Immunogenic peptide
CASSDYSNQPQH	HLA-A*02:01	EAAGIGILTV	McPAS	Immunogenic peptide
CASSEGMGQPQH	HLA-A*02:01	EAAGIGILTV	McPAS	Immunogenic peptide
CASSENQLMNTEA	HLA-A*02:01	EAAGIGILTV	McPAS	Immunogenic peptide
CASSFRGQNTEA	HLA-A*02:01	EAAGIGILTV	McPAS	Immunogenic peptide
CASSGQGMGYT	HLA-A*02:01	EAAGIGILTV	McPAS	Immunogenic peptide
CASSHQGVGQPQH	HLA-A*02:01	EAAGIGILTV	McPAS	Immunogenic peptide
CASSIAAVSLANYGYT	HLA-A*02:01	EAAGIGILTV	McPAS	Immunogenic peptide
CASSIEFDRGAPTEQY	HLA-A*02:01	EAAGIGILTV	McPAS	Immunogenic peptide
CASSKPSGINEQ	HLA-A*02:01	EAAGIGILTV	McPAS	Immunogenic peptide
CASSLAGLADNEQ	HLA-A*02:01	EAAGIGILTV	McPAS	Immunogenic peptide
CASSLAWALQDEQY	HLA-A*02:01	EAAGIGILTV	McPAS	Immunogenic peptide
CASSLLGGLEA	HLA-A*02:01	EAAGIGILTV	McPAS	Immunogenic peptide
CASSLQGLGTEA	HLA-A*02:01	EAAGIGILTV	McPAS	Immunogenic peptide
CASSLQGMGQPQH	HLA-A*02:01	EAAGIGILTV	McPAS	Immunogenic peptide
CASSLTTPPSTDTQY	HLA-A*02:01	EAAGIGILTV	McPAS	Immunogenic peptide
CASSPGQGSPLH	HLA-A*02:01	EAAGIGILTV	McPAS	Immunogenic peptide
CASSPGVLANEQY	HLA-A*02:01	EAAGIGILTV	McPAS	Immunogenic peptide
CASSQGQLSSYNEQ	HLA-A*02:01	EAAGIGILTV	McPAS	Immunogenic peptide
CASSQQGLGTEA	HLA-A*02:01	EAAGIGILTV	McPAS	Immunogenic peptide
CASSQYEVQETQY	HLA-A*02:01	EAAGIGILTV	McPAS	Immunogenic peptide
CASSVQGLGQPQH	HLA-A*02:01	EAAGIGILTV	McPAS	Immunogenic peptide
CASSVWADPNEA	HLA-A*02:01	EAAGIGILTV	McPAS	Immunogenic peptide
CASSWSQLVHEQ	HLA-A*02:01	EAAGIGILTV	McPAS	Immunogenic peptide
CASSYGDLYTGEL	HLA-A*02:01	EAAGIGILTV	McPAS	Immunogenic peptide
CASSYRGQSNQPQH	HLA-A*02:01	EAAGIGILTV	McPAS	Immunogenic peptide
CASTLTGLGQPQH	HLA-A*02:01	EAAGIGILTV	McPAS	Immunogenic peptide
CASTPPGSETQY	HLA-A*02:01	EAAGIGILTV	McPAS	Immunogenic peptide
CASTYTSLAHNEQ	HLA-A*02:01	EAAGIGILTV	McPAS	Immunogenic peptide
CATAPREDRVGNEA	HLA-A*02:01	EAAGIGILTV	McPAS	Immunogenic peptide
CATSDQGGTEDEQ	HLA-A*02:01	EAAGIGILTV	McPAS	Immunogenic peptide
CATSDSRQINTGEL	HLA-A*02:01	EAAGIGILTV	McPAS	Immunogenic peptide
CAWSGGGGRVHEQY	HLA-A*02:01	EAAGIGILTV	McPAS	Immunogenic peptide
CAWSVPGLGQPQH	HLA-A*02:01	EAAGIGILTV	McPAS	Immunogenic peptide
CAWSVQGLGYGYT	HLA-A*02:01	EAAGIGILTV	McPAS	Immunogenic peptide
CSAPDTGLGQPQH	HLA-A*02:01	EAAGIGILTV	McPAS	Immunogenic peptide
CSARAGAETQY	HLA-A*02:01	EAAGIGILTV	McPAS	Immunogenic peptide
CSARAGNQPQH	HLA-A*02:01	EAAGIGILTV	McPAS	Immunogenic peptide
CSARSRGGGIETQY	HLA-A*02:01	EAAGIGILTV	McPAS	Immunogenic peptide
CAFQEASYGYT	HLA-A*02:01	GLCTLVAML	McPAS_IEDB	Immunogenic peptide
CAMREVNTEA	HLA-A*02:01	GLCTLVAML	McPAS_IEDB	Immunogenic peptide
CARDGTGNGYT	HLA-A*02:01	GLCTLVAML	McPAS_IEDB	Immunogenic peptide
CARDRIGNGYT	HLA-A*02:01	GLCTLVAML	McPAS_IEDB	Immunogenic peptide
CARDRTGNGYT	HLA-A*02:01	GLCTLVAML	McPAS_IEDB	Immunogenic peptide
CARDSTGNGYT	HLA-A*02:01	GLCTLVAML	McPAS_IEDB	Immunogenic peptide
CARDSVGNGYT	HLA-A*02:01	GLCTLVAML	McPAS_IEDB	Immunogenic peptide
CARDTIGNGYT	HLA-A*02:01	GLCTLVAML	McPAS_IEDB	Immunogenic peptide
CAREGDVGNTIY	HLA-A*02:01	GLCTLVAML	McPAS_IEDB	Immunogenic peptide
CARGSVGNTIY	HLA-A*02:01	GLCTLVAML	McPAS_IEDB	Immunogenic peptide
CARVGVGNTIY	HLA-A*02:01	GLCTLVAML	McPAS_IEDB	Immunogenic peptide
CASDPLTASYEQY	HLA-A*02:01	NLVPMVATV	McPAS_IEDB	Immunogenic peptide
CASGGQVAPSEQ	HLA-A*02:01	GLCTLVAML	McPAS_IEDB	Immunogenic peptide
CASLLLGTAAEA	HLA-A*02:01	NLVPMVATV	McPAS_IEDB	Immunogenic peptide
CASPPAVSYEQY	HLA-A*02:01	GLCTLVAML	McPAS_IEDB	Immunogenic peptide
CASRLLAGGRSAQYT	HLA-A*02:01	NLVPMVATV	McPAS_IEDB	Immunogenic peptide
CASRQTGAAYGYT	HLA-A*02:01	NLVPMVATV	McPAS_IEDB	Immunogenic peptide
CASSLSSAGGAVYGYT	HLA-A*02:01	NLVPMVATV	McPAS_IEDB	Immunogenic peptide
CASSLSSANYGYT	HLA-A*02:01	NLVPMVATV	McPAS_IEDB	Immunogenic peptide
CASSLSSVNEAT	HLA-A*02:01	NLVPMVATV	McPAS_IEDB	Immunogenic peptide
CASSLSTTGSGDRGATEA	HLA-A*02:01	GLCTLVAML	McPAS_IEDB	Immunogenic peptide
CASSLSVGAAGTNEKL	HLA-A*02:01	GLCTLVAML	McPAS_IEDB	Immunogenic peptide
CASSLSVGAGGTNEKL	HLA-A*02:01	GLCTLVAML	McPAS_IEDB	Immunogenic peptide
CASSLSVGSGGTNEKL	HLA-A*02:01	GLCTLVAML	McPAS_IEDB	Immunogenic peptide
CASSLSVQEGNYGYT	HLA-A*02:01	GLCTLVAML	McPAS_IEDB	Immunogenic peptide
CASSTAGGTLPGEQY	HLA-A*02:01	GLCTLVAML	McPAS_IEDB	Immunogenic peptide
CASSTSGQISPSAIY	HLA-A*02:01	GLCTLVAML	McPAS_IEDB	Immunogenic peptide
CASSVSGGASNEQ	HLA-A*02:01	NLVPMVATV	McPAS_IEDB	Immunogenic peptide
CASYATGTAYGYT	HLA-A*02:01	NLVPMVATV	McPAS_IEDB	Immunogenic peptide
CAVGTGGTNEKL	HLA-A*02:01	GLCTLVAML	McPAS_IEDB	Immunogenic peptide
CAVGYGGTNEKL	HLA-A*02:01	GLCTLVAML	McPAS_IEDB	Immunogenic peptide
CACDSGTLNTGEL	HLA-A*02:01	EAAGIGILTV	McPAS	Immunogenic peptide
CANRLLAGGRSAQY	HLA-A*02:01	EAAGIGILTV	McPAS	Immunogenic peptide
CASAPARIWYNEQ	HLA-A*02:01	EAAGIGILTV	McPAS	Immunogenic peptide
CASATAGQSNYGYT	HLA-A*02:01	EAAGIGILTV	McPAS	Immunogenic peptide
CASGFQGLGSPLH	HLA-A*02:01	EAAGIGILTV	McPAS	Immunogenic peptide
CASGFQGLGYGYT	HLA-A*02:01	EAAGIGILTV	McPAS	Immunogenic peptide
CASGQGGAYGEL	HLA-A*02:01	EAAGIGILTV	McPAS	Immunogenic peptide
CASGVQGLGQPQH	HLA-A*02:01	EAAGIGILTV	McPAS	Immunogenic peptide
CASKEGLLDTGEL	HLA-A*02:01	EAAGIGILTV	McPAS	Immunogenic peptide
CASKGGANEQ	HLA-A*02:01	EAAGIGILTV	McPAS	Immunogenic peptide
CASMDGSGIYNEQ	HLA-A*02:01	EAAGIGILTV	McPAS	Immunogenic peptide
CASMEISGGAVKNIQY	HLA-A*02:01	EAAGIGILTV	McPAS	Immunogenic peptide
CASQLSGGAVVETQY	HLA-A*02:01	EAAGIGILTV	McPAS	Immunogenic peptide
CASRAEILATNEKL	HLA-A*02:01	EAAGIGILTV	McPAS	Immunogenic peptide
CASRAGFLSSYEQY	HLA-A*02:01	EAAGIGILTV	McPAS	Immunogenic peptide
CASRAPGLANNEQ	HLA-A*02:01	EAAGIGILTV	McPAS	Immunogenic peptide
CASRLGTGPEA	HLA-A*02:01	EAAGIGILTV	McPAS	Immunogenic peptide
CASRLQGLGSPLH	HLA-A*02:01	EAAGIGILTV	McPAS	Immunogenic peptide
CASRLSLFIGSGGYEQY	HLA-A*02:01	EAAGIGILTV	McPAS	Immunogenic peptide
CASRPEGGSTEA	HLA-A*02:01	EAAGIGILTV	McPAS	Immunogenic peptide
CASRPQGLGQPQH	HLA-A*02:01	EAAGIGILTV	McPAS	Immunogenic peptide
CASRRDLMNTEA	HLA-A*02:01	EAAGIGILTV	McPAS	Immunogenic peptide
CASRRQSSYNEQ	HLA-A*02:01	EAAGIGILTV	McPAS	Immunogenic peptide
CASRSLGQGAEKL	HLA-A*02:01	EAAGIGILTV	McPAS	Immunogenic peptide
CASSAGTGGFGQPQH	HLA-A*02:01	EAAGIGILTV	McPAS	Immunogenic peptide
CASSAQFLFASGYT	HLA-A*02:01	EAAGIGILTV	McPAS	Immunogenic peptide
CASSDAGTASYEQY	HLA-A*02:01	EAAGIGILTV	McPAS	Immunogenic peptide
CASSDLAGATGEL	HLA-A*02:01	EAAGIGILTV	McPAS	Immunogenic peptide
CASSDQGLGTEA	HLA-A*02:01	EAAGIGILTV	McPAS	Immunogenic peptide
CASSEAVTGLGETQY	HLA-A*02:01	EAAGIGILTV	McPAS	Immunogenic peptide
CASSEDSGGAYSGEL	HLA-A*02:01	EAAGIGILTV	McPAS	Immunogenic peptide
CASSEGAGGAWGDGYT	HLA-A*02:01	EAAGIGILTV	McPAS	Immunogenic peptide
CASSEGQGAFGNTIY	HLA-A*02:01	EAAGIGILTV	McPAS	Immunogenic peptide
CASSEGYGVNGSPLH	HLA-A*02:01	EAAGIGILTV	McPAS	Immunogenic peptide
CASSESQAYNSPLH	HLA-A*02:01	EAAGIGILTV	McPAS	Immunogenic peptide
CASSESYSGPGEL	HLA-A*02:01	EAAGIGILTV	McPAS	Immunogenic peptide
CASSETASTWAGEL	HLA-A*02:01	EAAGIGILTV	McPAS	Immunogenic peptide
CASSETGGTEA	HLA-A*02:01	EAAGIGILTV	McPAS	Immunogenic peptide
CASSFDVAGGQIGEL	HLA-A*02:01	EAAGIGILTV	McPAS	Immunogenic peptide
CASSFGGLGQPQH	HLA-A*02:01	EAAGIGILTV	McPAS	Immunogenic peptide
CASSFGGLGTEA	HLA-A*02:01	EAAGIGILTV	McPAS	Immunogenic peptide
CASSFGGMGQPQH	HLA-A*02:01	EAAGIGILTV	McPAS	Immunogenic peptide
CASSFGKIAGDEQY	HLA-A*02:01	EAAGIGILTV	McPAS	Immunogenic peptide
CASSFLGSSSYEQY	HLA-A*02:01	EAAGIGILTV	McPAS	Immunogenic peptide
CASSFLGTASYEQY	HLA-A*02:01	EAAGIGILTV	McPAS	Immunogenic peptide
CASSFMGSSSYEQY	HLA-A*02:01	EAAGIGILTV	McPAS	Immunogenic peptide
CASSFMGTSSYEQY	HLA-A*02:01	EAAGIGILTV	McPAS	Immunogenic peptide
CASSFNTGEL	HLA-A*02:01	EAAGIGILTV	McPAS	Immunogenic peptide
CASSFQGLGQPQH	HLA-A*02:01	EAAGIGILTV	McPAS	Immunogenic peptide
CASSFQGLGSPLH	HLA-A*02:01	EAAGIGILTV	McPAS	Immunogenic peptide
CASSFTVGGQETQY	HLA-A*02:01	EAAGIGILTV	McPAS	Immunogenic peptide
CASSGAGGWTEA	HLA-A*02:01	EAAGIGILTV	McPAS	Immunogenic peptide
CASSGTGLGQPQH	HLA-A*02:01	EAAGIGILTV	McPAS	Immunogenic peptide
CASSGTSGNYEQY	HLA-A*02:01	EAAGIGILTV	McPAS	Immunogenic peptide
CASSHDGPGEQ	HLA-A*02:01	EAAGIGILTV	McPAS	Immunogenic peptide
CASSHGQLQETQY	HLA-A*02:01	EAAGIGILTV	McPAS	Immunogenic peptide
CASSIGAGLGQPQH	HLA-A*02:01	EAAGIGILTV	McPAS	Immunogenic peptide
CASSIGGLAGNEQ	HLA-A*02:01	EAAGIGILTV	McPAS	Immunogenic peptide
CASSIGGLGTEA	HLA-A*02:01	EAAGIGILTV	McPAS	Immunogenic peptide
CASSIGVDGNTIY	HLA-A*02:01	EAAGIGILTV	McPAS	Immunogenic peptide
CASSITGGFGNEQ	HLA-A*02:01	EAAGIGILTV	McPAS	Immunogenic peptide
CASSLAGPNQETQY	HLA-A*02:01	EAAGIGILTV	McPAS	Immunogenic peptide
CASSLAGSSSYEQY	HLA-A*02:01	EAAGIGILTV	McPAS	Immunogenic peptide
CASSLAGWSFADTQY	HLA-A*02:01	EAAGIGILTV	McPAS	Immunogenic peptide
CASSLANQNTGEL	HLA-A*02:01	EAAGIGILTV	McPAS	Immunogenic peptide
CASSLEGAVLEAEA	HLA-A*02:01	EAAGIGILTV	McPAS	Immunogenic peptide
CASSLEGQASSYEQY	HLA-A*02:01	EAAGIGILTV	McPAS	Immunogenic peptide
CASSLETSGWGQY	HLA-A*02:01	EAAGIGILTV	McPAS	Immunogenic peptide
CASSLFGGLSYGYT	HLA-A*02:01	EAAGIGILTV	McPAS	Immunogenic peptide
CASSLGDVDEY	HLA-A*02:01	EAAGIGILTV	McPAS_VDJdb	Immunogenic peptide
CASSLGGAASGEL	HLA-A*02:01	EAAGIGILTV	McPAS	Immunogenic peptide
CASSLGLAGNSEQ	HLA-A*02:01	EAAGIGILTV	McPAS	Immunogenic peptide
CASSLGLGGVRWSVKNIQY	HLA-A*02:01	EAAGIGILTV	McPAS	Immunogenic peptide
CASSLGQGDQPQH	HLA-A*02:01	EAAGIGILTV	McPAS	Immunogenic peptide
CASSLGQVSVGNEQ	HLA-A*02:01	EAAGIGILTV	McPAS	Immunogenic peptide
CASSLQELSQDGYT	HLA-A*02:01	EAAGIGILTV	McPAS	Immunogenic peptide
CASSLQGLGQPQH	HLA-A*02:01	EAAGIGILTV	McPAS_VDJdb	Immunogenic peptide
CASSLSAGLTTGEL	HLA-A*02:01	EAAGIGILTV	McPAS	Immunogenic peptide
CASSLSGAEGYT	HLA-A*02:01	EAAGIGILTV	McPAS	Immunogenic peptide
CASSLSGGFYEQY	HLA-A*02:01	EAAGIGILTV	McPAS	Immunogenic peptide
CASSLSGLAGGYEQY	HLA-A*02:01	EAAGIGILTV	McPAS	Immunogenic peptide
CASSLSNEGNEQY	HLA-A*02:01	EAAGIGILTV	McPAS_VDJdb	Immunogenic peptide
CASSLSPGMVGEQY	HLA-A*02:01	EAAGIGILTV	McPAS	Immunogenic peptide
CASSLSQGAYSSPLH	HLA-A*02:01	EAAGIGILTV	McPAS	Immunogenic peptide
CASSLVGGDTEA	HLA-A*02:01	EAAGIGILTV	McPAS	Immunogenic peptide
CASSLVGTPDYNEQ	HLA-A*02:01	EAAGIGILTV	McPAS	Immunogenic peptide
CASSLVGVPGANVLT	HLA-A*02:01	EAAGIGILTV	McPAS	Immunogenic peptide
CASSLYSPRAANTGE	HLA-A*02:01	EAAGIGILTV	McPAS	Immunogenic peptide
CASSMGTGVFAGEL	HLA-A*02:01	EAAGIGILTV	McPAS	Immunogenic peptide
CASSNTTGTVYEQY	HLA-A*02:01	EAAGIGILTV	McPAS	Immunogenic peptide
CASSPAALSGAYEQY	HLA-A*02:01	EAAGIGILTV	McPAS	Immunogenic peptide
CASSPAGTGTSEQY	HLA-A*02:01	EAAGIGILTV	McPAS	Immunogenic peptide
CASSPGGGYTEA	HLA-A*02:01	EAAGIGILTV	McPAS	Immunogenic peptide
CASSPGGLGGQY	HLA-A*02:01	EAAGIGILTV	McPAS	Immunogenic peptide
CASSPGQMNTEA	HLA-A*02:01	EAAGIGILTV	McPAS	Immunogenic peptide
CASSPGVAGISGEQ	HLA-A*02:01	EAAGIGILTV	McPAS	Immunogenic peptide
CASSPGVLDYGYT	HLA-A*02:01	EAAGIGILTV	McPAS	Immunogenic peptide
CASSPLKTTYEQY	HLA-A*02:01	EAAGIGILTV	McPAS	Immunogenic peptide
CASSPPGQEAYGYGYT	HLA-A*02:01	EAAGIGILTV	McPAS	Immunogenic peptide
CASSPQGLGQPQH	HLA-A*02:01	EAAGIGILTV	McPAS	Immunogenic peptide
CASSPQGLGTEA	HLA-A*02:01	EAAGIGILTV	McPAS	Immunogenic peptide
CASSPTGLGQPQH	HLA-A*02:01	EAAGIGILTV	McPAS	Immunogenic peptide
CASSPTTGKTEA	HLA-A*02:01	EAAGIGILTV	McPAS	Immunogenic peptide
CASSPTTGLGSYEQY	HLA-A*02:01	EAAGIGILTV	McPAS	Immunogenic peptide
CASSQADLIAGEL	HLA-A*02:01	EAAGIGILTV	McPAS	Immunogenic peptide
CASSQAGVGQPQH	HLA-A*02:01	EAAGIGILTV	McPAS	Immunogenic peptide
CASSQDFLSTDTQY	HLA-A*02:01	EAAGIGILTV	McPAS	Immunogenic peptide
CASSQDLAGGLEQY	HLA-A*02:01	EAAGIGILTV	McPAS	Immunogenic peptide
CASSQDLLDRSGYT	HLA-A*02:01	EAAGIGILTV	McPAS	Immunogenic peptide
CASSQDLLEGNGYT	HLA-A*02:01	EAAGIGILTV	McPAS	Immunogenic peptide
CASSQDRLDYGYT	HLA-A*02:01	EAAGIGILTV	McPAS	Immunogenic peptide
CASSQDRLNTEA	HLA-A*02:01	EAAGIGILTV	McPAS	Immunogenic peptide
CASSQEAGGMADTQY	HLA-A*02:01	EAAGIGILTV	McPAS	Immunogenic peptide
CASSQEEGGAPEA	HLA-A*02:01	EAAGIGILTV	McPAS	Immunogenic peptide
CASSQEGLGVSLH	HLA-A*02:01	EAAGIGILTV	McPAS	Immunogenic peptide
CASSQELLQGRGYT	HLA-A*02:01	EAAGIGILTV	McPAS	Immunogenic peptide
CASSQENFQGQAGNTIY	HLA-A*02:01	EAAGIGILTV	McPAS	Immunogenic peptide
CASSQFSLGHTDTQY	HLA-A*02:01	EAAGIGILTV	McPAS	Immunogenic peptide
CASSQGDRGREA	HLA-A*02:01	EAAGIGILTV	McPAS	Immunogenic peptide
CASSQGDWGGSQPQH	HLA-A*02:01	EAAGIGILTV	McPAS_VDJdb	Immunogenic peptide
CASSQGGLGQPQH	HLA-A*02:01	EAAGIGILTV	McPAS	Immunogenic peptide
CASSQGGVGQPQH	HLA-A*02:01	EAAGIGILTV	McPAS	Immunogenic peptide
CASSQGHSGEL	HLA-A*02:01	EAAGIGILTV	McPAS	Immunogenic peptide
CASSQGQDGSYEQY	HLA-A*02:01	EAAGIGILTV	McPAS	Immunogenic peptide
CASSQGRVAAPEA	HLA-A*02:01	EAAGIGILTV	McPAS	Immunogenic peptide
CASSQNPNTEA	HLA-A*02:01	EAAGIGILTV	McPAS	Immunogenic peptide
CASSQQGLGQPQH	HLA-A*02:01	EAAGIGILTV	McPAS_VDJdb	Immunogenic peptide
CASSQQQGEGGEL	HLA-A*02:01	EAAGIGILTV	McPAS	Immunogenic peptide
CASSQTGVGQPQH	HLA-A*02:01	EAAGIGILTV	McPAS	Immunogenic peptide
CASSQVKVGAVDGYT	HLA-A*02:01	EAAGIGILTV	McPAS	Immunogenic peptide
CASSQVMVGAVDGYT	HLA-A*02:01	EAAGIGILTV	McPAS	Immunogenic peptide
CASSRDSALWISTDTQY	HLA-A*02:01	EAAGIGILTV	McPAS_VDJdb	Immunogenic peptide
CASSRRDYRCETQY	HLA-A*02:01	EAAGIGILTV	McPAS	Immunogenic peptide
CASSSAGGFGEL	HLA-A*02:01	EAAGIGILTV	McPAS	Immunogenic peptide
CASSSDSGNIQY	HLA-A*02:01	EAAGIGILTV	McPAS	Immunogenic peptide
CASSSFADRAGNQPQH	HLA-A*02:01	EAAGIGILTV	McPAS	Immunogenic peptide
CASSSGGAFYEQY	HLA-A*02:01	EAAGIGILTV	McPAS	Immunogenic peptide
CASSSGHYTDTQY	HLA-A*02:01	EAAGIGILTV	McPAS	Immunogenic peptide
CASSSGIGDTQY	HLA-A*02:01	EAAGIGILTV	McPAS	Immunogenic peptide
CASSSLQGAFADTQY	HLA-A*02:01	EAAGIGILTV	McPAS	Immunogenic peptide
CASSSQGLGNYGYT	HLA-A*02:01	EAAGIGILTV	McPAS	Immunogenic peptide
CASSSRSSYEQY	HLA-A*02:01	EAAGIGILTV	McPAS	Immunogenic peptide
CASSSSFLADEQ	HLA-A*02:01	EAAGIGILTV	McPAS	Immunogenic peptide
CASSSSGPRDEQ	HLA-A*02:01	EAAGIGILTV	McPAS	Immunogenic peptide
CASSSSGVGNE	HLA-A*02:01	EAAGIGILTV	McPAS	Immunogenic peptide
CASSSSSNPGPPLH	HLA-A*02:01	EAAGIGILTV	McPAS	Immunogenic peptide
CASSTGALMNTEA	HLA-A*02:01	EAAGIGILTV	McPAS	Immunogenic peptide
CASSVAHVDEQ	HLA-A*02:01	EAAGIGILTV	McPAS	Immunogenic peptide
CASSVDAGGAGEL	HLA-A*02:01	EAAGIGILTV	McPAS	Immunogenic peptide
CASSVDVGGLEA	HLA-A*02:01	EAAGIGILTV	McPAS	Immunogenic peptide
CASSVEGGGAWTDTQY	HLA-A*02:01	EAAGIGILTV	McPAS	Immunogenic peptide
CASSVGFAGDEA	HLA-A*02:01	EAAGIGILTV	McPAS	Immunogenic peptide
CASSVGGLAIGEL	HLA-A*02:01	EAAGIGILTV	McPAS	Immunogenic peptide
CASSVGGLNTGEL	HLA-A*02:01	EAAGIGILTV	McPAS	Immunogenic peptide
CASSVGQAAEA	HLA-A*02:01	EAAGIGILTV	McPAS	Immunogenic peptide
CASSVVPTVGFAGEL	HLA-A*02:01	EAAGIGILTV	McPAS	Immunogenic peptide
CASSWDGTLGQPQH	HLA-A*02:01	EAAGIGILTV	McPAS	Immunogenic peptide
CASSWGGTSGNTIY	HLA-A*02:01	EAAGIGILTV	McPAS	Immunogenic peptide
CASSWGQGQETQY	HLA-A*02:01	EAAGIGILTV	McPAS	Immunogenic peptide
CASSWVGQGAFEA	HLA-A*02:01	EAAGIGILTV	McPAS	Immunogenic peptide
CASSYGGGFYGYT	HLA-A*02:01	EAAGIGILTV	McPAS	Immunogenic peptide
CASSYGGLGQPQH	HLA-A*02:01	EAAGIGILTV	McPAS	Immunogenic peptide
CASSYGGQGSEKL	HLA-A*02:01	EAAGIGILTV	McPAS	Immunogenic peptide
CASSYLGMGQPQH	HLA-A*02:01	EAAGIGILTV	McPAS	Immunogenic peptide
CASSYSAGQAFDSPLH	HLA-A*02:01	EAAGIGILTV	McPAS	Immunogenic peptide
CASSYSNPRAHNSPLH	HLA-A*02:01	EAAGIGILTV	McPAS	Immunogenic peptide
CASSYSRDNEQ	HLA-A*02:01	EAAGIGILTV	McPAS	Immunogenic peptide
CASSYTGGGYNGEL	HLA-A*02:01	EAAGIGILTV	McPAS	Immunogenic peptide
CASSYTGLATNEQ	HLA-A*02:01	EAAGIGILTV	McPAS	Immunogenic peptide
CASSYVGAAGEL	HLA-A*02:01	EAAGIGILTV	McPAS	Immunogenic peptide
CASTAGGTLPGEQY	HLA-A*02:01	EAAGIGILTV	McPAS	Immunogenic peptide
CASTFGGLGQPQH	HLA-A*02:01	EAAGIGILTV	McPAS	Immunogenic peptide
CASTFGGTGSGYT	HLA-A*02:01	EAAGIGILTV	McPAS	Immunogenic peptide
CASTGGSRRLRVGEQY	HLA-A*02:01	EAAGIGILTV	McPAS	Immunogenic peptide
CASTHSGLGAYEQY	HLA-A*02:01	EAAGIGILTV	McPAS	Immunogenic peptide
CASTIAGAWTEA	HLA-A*02:01	EAAGIGILTV	McPAS	Immunogenic peptide
CASTIQGLGQPQH	HLA-A*02:01	EAAGIGILTV	McPAS	Immunogenic peptide
CASTKMAGSNTEA	HLA-A*02:01	EAAGIGILTV	McPAS	Immunogenic peptide
CASTLGQGVLNTEA	HLA-A*02:01	EAAGIGILTV	McPAS	Immunogenic peptide
CASTLQGLGQPQH	HLA-A*02:01	EAAGIGILTV	McPAS	Immunogenic peptide
CASTNSPAFRAEA	HLA-A*02:01	EAAGIGILTV	McPAS	Immunogenic peptide
CASTNTGTGSYEQY	HLA-A*02:01	EAAGIGILTV	McPAS	Immunogenic peptide
CASTPGEGAGHGYT	HLA-A*02:01	EAAGIGILTV	McPAS	Immunogenic peptide
CASTPSGIFGEKL	HLA-A*02:01	EAAGIGILTV	McPAS	Immunogenic peptide
CASTPSGTASYEQY	HLA-A*02:01	EAAGIGILTV	McPAS	Immunogenic peptide
CASTPSGTPSYEQY	HLA-A*02:01	EAAGIGILTV	McPAS	Immunogenic peptide
CASTRAGGITYEQY	HLA-A*02:01	EAAGIGILTV	McPAS	Immunogenic peptide
CASTSGAQSVDEQY	HLA-A*02:01	EAAGIGILTV	McPAS	Immunogenic peptide
CASTSGGLGQPQH	HLA-A*02:01	EAAGIGILTV	McPAS	Immunogenic peptide
CATLRDRANQPQH	HLA-A*02:01	EAAGIGILTV	McPAS	Immunogenic peptide
CAWSVTGLGTEA	HLA-A*02:01	EAAGIGILTV	McPAS	Immunogenic peptide
CSAADTGLGQPQH	HLA-A*02:01	EAAGIGILTV	McPAS	Immunogenic peptide
CSAAPPGLGSPLH	HLA-A*02:01	EAAGIGILTV	McPAS	Immunogenic peptide
CSAAYRDGASYGYT	HLA-A*02:01	EAAGIGILTV	McPAS	Immunogenic peptide
CSAGDLLNTGEL	HLA-A*02:01	EAAGIGILTV	McPAS	Immunogenic peptide
CSAILAGVYNEQ	HLA-A*02:01	EAAGIGILTV	McPAS	Immunogenic peptide
CSAKPPRGIYNEQ	HLA-A*02:01	EAAGIGILTV	McPAS	Immunogenic peptide
CSANTRLTSYEQY	HLA-A*02:01	EAAGIGILTV	McPAS	Immunogenic peptide
CSARDFRESNTIY	HLA-A*02:01	EAAGIGILTV	McPAS	Immunogenic peptide
CSAREGGILTDTQY	HLA-A*02:01	EAAGIGILTV	McPAS	Immunogenic peptide
CSARPGQGDTEA	HLA-A*02:01	EAAGIGILTV	McPAS	Immunogenic peptide
CSASETGVGQPQH	HLA-A*02:01	EAAGIGILTV	McPAS_VDJdb	Immunogenic peptide
CSASETLVGQPQH	HLA-A*02:01	EAAGIGILTV	McPAS	Immunogenic peptide
CSASHLGSGDYGYT	HLA-A*02:01	EAAGIGILTV	McPAS	Immunogenic peptide
CSASQGLTEA	HLA-A*02:01	EAAGIGILTV	McPAS	Immunogenic peptide
CSATRTGAGANVLT	HLA-A*02:01	EAAGIGILTV	McPAS	Immunogenic peptide
CSVERRTSGGARGTGEL	HLA-A*02:01	EAAGIGILTV	McPAS	Immunogenic peptide
CSVPGLLNTEA	HLA-A*02:01	EAAGIGILTV	McPAS	Immunogenic peptide
CSVSDLGVGQPQH	HLA-A*02:01	EAAGIGILTV	McPAS_VDJdb	Immunogenic peptide
CAISDPGDTQY	HLA-B*07:02	RPRGEVRFL	McPAS_IEDB_TBA_VDJdb	Immunogenic peptide
CAISDPSGSSYNEQ	HLA-B*07:02	RPRGEVRFL	McPAS_TBA	Immunogenic peptide
CASREWGGTDTQY	HLA-B*07:02	RPRGEVRFL	McPAS_IEDB_TBA_VDJdb	Immunogenic peptide
CASRIWGGADTQY	HLA-B*07:02	RPRGEVRFL	McPAS_IEDB_TBA_VDJdb	Immunogenic peptide
CASRKTGGGEA	HLA-B*07:02	RPRGEVRFL	McPAS_TBA	Immunogenic peptide
CASRKTGGGTEA	HLA-B*07:02	RPRGEVRFL	McPAS_TBA	Immunogenic peptide
CASRLIGGGTEA	HLA-B*07:02	RPRGEVRFL	McPAS_TBA	Immunogenic peptide
CASRLQGINEKL	HLA-B*07:02	RPRGEVRFL	McPAS_TBA	Immunogenic peptide
CASRLTGEKQETQY	HLA-B*07:02	RPRGEVRFL	McPAS_IEDB_TBA_VDJdb	Immunogenic peptide
CASRMQGRDNEQ	HLA-B*07:02	RPRGEVRFL	McPAS_TBA	Immunogenic peptide
CASRPQGANEKL	HLA-B*07:02	RPRGEVRFL	McPAS_TBA	Immunogenic peptide
CASRPQGRDNEQ	HLA-B*07:02	RPRGEVRFL	McPAS_TBA	Immunogenic peptide
CASRPQGRDQPQH	HLA-B*07:02	RPRGEVRFL	McPAS_IEDB_TBA_VDJdb	Immunogenic peptide
CASRPQGREETQY	HLA-B*07:02	RPRGEVRFL	McPAS_IEDB_TBA_VDJdb	Immunogenic peptide
CASRRQGRDNEQ	HLA-B*07:02	RPRGEVRFL	McPAS_TBA	Immunogenic peptide
CASRVQGRDNEQ	HLA-B*07:02	RPRGEVRFL	McPAS_TBA	Immunogenic peptide
CASSDSYRGSYNEQ	HLA-B*07:02	RPRGEVRFL	McPAS_TBA	Immunogenic peptide
CASSLGGLGDTQY	HLA-B*07:02	RPRGEVRFL	McPAS_IEDB_TBA_VDJdb	Immunogenic peptide
CASSLHLGGVTDTQY	HLA-B*07:02	RPRGEVRFL	McPAS_IEDB_TBA_VDJdb	Immunogenic peptide
CASSPYQTGLDGYT	HLA-B*07:02	RPRGEVRFL	McPAS_IEDB_TBA_VDJdb	Immunogenic peptide
CASSQEVAGATGEL	HLA-B*07:02	RPRGEVRFL	McPAS_IEDB_TBA	Immunogenic peptide
CASSSTPLSTDTQY	HLA-B*07:02	RPRGEVRFL	McPAS_IEDB_TBA_VDJdb	Immunogenic peptide
CASSTDSVDEQ	HLA-B*07:02	RPRGEVRFL	McPAS_TBA	Immunogenic peptide
CASSVIGATYEQY	HLA-B*07:02	RPRGEVRFL	McPAS_IEDB_TBA_VDJdb	Immunogenic peptide
CASSVQALLAGDWADTQY	HLA-B*07:02	RPRGEVRFL	McPAS_IEDB_TBA_VDJdb	Immunogenic peptide
CASSVWGTDTQY	HLA-B*07:02	RPRGEVRFL	McPAS_IEDB_TBA_VDJdb	Immunogenic peptide
CATRIGWGTDTQY	HLA-B*07:02	RPRGEVRFL	McPAS_IEDB_TBA_VDJdb	Immunogenic peptide
CATSEAASSWTGEL	HLA-B*07:02	RPRGEVRFL	McPAS_TBA	Immunogenic peptide
CAWTETGLSGNTIY	HLA-B*07:02	RPRGEVRFL	McPAS_IEDB_TBA_VDJdb	Immunogenic peptide
CSALRDNYNSPLH	HLA-B*07:02	RPRGEVRFL	McPAS_IEDB_TBA_VDJdb	Immunogenic peptide
CASIWAGLGQPQH	HLA-A*02:01	ELAGIGILTV	McPAS_IEDB_VDJdb	Immunogenic peptide
CASQSGFLSNSPLH	HLA-A*02:01	ELAGIGILTV	McPAS_IEDB_VDJdb	Immunogenic peptide
CASRLATLVGNEQ	HLA-A*02:01	ELAGIGILTV	McPAS	Immunogenic peptide
CASRQQGLGSPLH	HLA-A*02:01	ELAGIGILTV	McPAS_IEDB_VDJdb	Immunogenic peptide
CASRSGSLNTEA	HLA-A*02:01	ELAGIGILTV	McPAS	Immunogenic peptide
CASRWGQLTNYGY	HLA-A*02:01	ELAGIGILTV	McPAS	Immunogenic peptide
CASRYQGLGQPQH	HLA-A*02:01	ELAGIGILTV	McPAS_IEDB_VDJdb	Immunogenic peptide
CASSATGADQPQH	HLA-A*02:01	ELAGIGILTV	McPAS_IEDB_VDJdb	Immunogenic peptide
CASSDYSNQPQH	HLA-A*02:01	ELAGIGILTV	McPAS_IEDB_VDJdb	Immunogenic peptide
CASSEGMGQPQH	HLA-A*02:01	ELAGIGILTV	McPAS_IEDB_VDJdb	Immunogenic peptide
CASSENQLNMTEA	HLA-A*02:01	ELAGIGILTV	McPAS	Immunogenic peptide
CASSGQGMGYT	HLA-A*02:01	ELAGIGILTV	McPAS_IEDB_VDJdb	Immunogenic peptide
CASSIAAVSALYGYTL	HLA-A*02:01	ELAGIGILTV	McPAS	Immunogenic peptide
CASSIEFDRGAPTEQY	HLA-A*02:01	ELAGIGILTV	McPAS_IEDB_VDJdb	Immunogenic peptide
CASSKPSGGINEQ	HLA-A*02:01	ELAGIGILTV	McPAS	Immunogenic peptide
CASSLAWALQDEQY	HLA-A*02:01	ELAGIGILTV	McPAS_IEDB_VDJdb	Immunogenic peptide
CASSLQGLGTEA	HLA-A*02:01	ELAGIGILTV	McPAS	Immunogenic peptide
CASSLQGMGQPQH	HLA-A*02:01	ELAGIGILTV	McPAS_IEDB_VDJdb	Immunogenic peptide
CASSLTTPPSTDPQY	HLA-A*02:01	ELAGIGILTV	McPAS	Immunogenic peptide
CASSPGQGLPNH	HLA-A*02:01	ELAGIGILTV	McPAS	Immunogenic peptide
CASSPGVLANEQY	HLA-A*02:01	ELAGIGILTV	McPAS_IEDB_VDJdb	Immunogenic peptide
CASSQGQLSSYNEQ	HLA-A*02:01	ELAGIGILTV	McPAS	Immunogenic peptide
CASSQQGLGTEA	HLA-A*02:01	ELAGIGILTV	McPAS	Immunogenic peptide
CASSVQGLGQPQH	HLA-A*02:01	ELAGIGILTV	McPAS_IEDB_VDJdb	Immunogenic peptide
CASSVWADPNEA	HLA-A*02:01	ELAGIGILTV	McPAS	Immunogenic peptide
CASSWSQLVHEQ	HLA-A*02:01	ELAGIGILTV	McPAS	Immunogenic peptide
CASSYGDLYTGEL	HLA-A*02:01	ELAGIGILTV	McPAS	Immunogenic peptide
CASSYRGQSNQPQH	HLA-A*02:01	ELAGIGILTV	McPAS_IEDB_VDJdb	Immunogenic peptide
CASTLTGLGQPQH	HLA-A*02:01	ELAGIGILTV	McPAS_IEDB_VDJdb	Immunogenic peptide
CASTPPGSETQY	HLA-A*02:01	ELAGIGILTV	McPAS_IEDB_VDJdb	Immunogenic peptide
CASTYTSLAHNEQ	HLA-A*02:01	ELAGIGILTV	McPAS	Immunogenic peptide
CATAPREDRVGNEA	HLA-A*02:01	ELAGIGILTV	McPAS	Immunogenic peptide
CATSDQGGTEDEQ	HLA-A*02:01	ELAGIGILTV	McPAS	Immunogenic peptide
CATSDSRQINTGEL	HLA-A*02:01	ELAGIGILTV	McPAS	Immunogenic peptide
CAWSGGGGRVHEQY	HLA-A*02:01	ELAGIGILTV	McPAS_IEDB_VDJdb	Immunogenic peptide
CAWSVPGLGQPQH	HLA-A*02:01	ELAGIGILTV	McPAS_IEDB_VDJdb	Immunogenic peptide
CAWSVQGLGYGYT	HLA-A*02:01	ELAGIGILTV	McPAS_IEDB_VDJdb	Immunogenic peptide
CSAPDTGLGQPQH	HLA-A*02:01	ELAGIGILTV	McPAS_IEDB_VDJdb	Immunogenic peptide
CSARAGAETQY	HLA-A*02:01	ELAGIGILTV	McPAS_IEDB_VDJdb	Immunogenic peptide
CSARSRGGGIETQY	HLA-A*02:01	ELAGIGILTV	McPAS_IEDB_VDJdb	Immunogenic peptide
CGARDGPGNGYT	HLA-A*02:01	GLCTLVAML	McPAS_IEDB	Immunogenic peptide
CGARDGTGNGYT	HLA-A*02:01	GLCTLVAML	McPAS_IEDB	Immunogenic peptide
CSARDATGNGYT	HLA-A*02:01	GLCTLVAML	McPAS_IEDB_VDJdb	Immunogenic peptide
CSARDGKGNGYT	HLA-A*02:01	GLCTLVAML	McPAS_IEDB_VDJdb	Immunogenic peptide
CSARDGNREWLH	HLA-A*02:01	GLCTLVAML	McPAS_IEDB_TBA	Immunogenic peptide
CSARDGSGNGYT	HLA-A*02:01	GLCTLVAML	McPAS_IEDB_VDJdb	Immunogenic peptide
CSARDGTGNDYT	HLA-A*02:01	GLCTLVAML	McPAS_IEDB_TBA_VDJdb	Immunogenic peptide
CSARDNLSGYT	HLA-A*02:01	GLCTLVAML	McPAS_IEDB_VDJdb	Immunogenic peptide
CSARDQKGNGYT	HLA-A*02:01	GLCTLVAML	McPAS	Immunogenic peptide
CSARDRHREWLH	HLA-A*02:01	GLCTLVAML	McPAS_IEDB_TBA	Immunogenic peptide
CSARDRKGNGYT	HLA-A*02:01	GLCTLVAML	McPAS_IEDB_VDJdb	Immunogenic peptide
CSARDWTGNGYT	HLA-A*02:01	GLCTLVAML	McPAS_IEDB_VDJdb	Immunogenic peptide
CSAREGTGNGYT	HLA-A*02:01	GLCTLVAML	McPAS_IEDB_TBA_VDJdb	Immunogenic peptide
CSARSGTGGDYT	HLA-A*02:01	GLCTLVAML	McPAS_IEDB_VDJdb	Immunogenic peptide
CAAADEEIGNQPQH	HLA-A*01:01	ATDALMTGY	McPAS_IEDB_TBA_VDJdb	Immunogenic peptide
CAIRAGGDEQ	HLA-B*08:01	HSKKKCDEL	McPAS_TBA	Immunogenic peptide
CAIRTGGDEQ	HLA-B*08:01	HSKKKCDEL	McPAS_TBA	Immunogenic peptide
CAIRTRIGETQY	HLA-B*08:01	HSKKKCDEL	McPAS_IEDB_TBA_VDJdb	Immunogenic peptide
CAIRTRTGESYT	HLA-B*08:01	HSKKKCDEL	McPAS_IEDB_TBA_VDJdb	Immunogenic peptide
CAISDAGAGNQPQH	HLA-A*01:01	ATDALMTGY	McPAS_IEDB_TBA_VDJdb	Immunogenic peptide
CAISDEGRNTEA	HLA-B*08:01	HSKKKCDEL	McPAS_TBA	Immunogenic peptide
CAISEGAMGNQPQH	HLA-A*01:01	ATDALMTGY	McPAS_IEDB_TBA_VDJdb	Immunogenic peptide
CAISERHLTDTQY	HLA-B*08:01	HSKKKCDEL	McPAS_IEDB_TBA_VDJdb	Immunogenic peptide
CAISESSIGNQPQH	HLA-A*01:01	ATDALMTGY	McPAS_IEDB_TBA_VDJdb	Immunogenic peptide
CAISESSSGANVLT	HLA-A*01:01	ATDALMTGY	McPAS_IEDB_TBA_VDJdb	Immunogenic peptide
CAISESTGPGGDTQY	HLA-B*08:01	HSKKKCDEL	McPAS_IEDB_TBA_VDJdb	Immunogenic peptide
CAISETDKLG	HLA-B*08:01	HSKKKCDEL	McPAS_TBA	Immunogenic peptide
CAISEVQETQY	HLA-B*08:01	HSKKKCDEL	McPAS_IEDB_TBA_VDJdb	Immunogenic peptide
CAISGGSGDNEQ	HLA-B*08:01	HSKKKCDEL	McPAS_TBA	Immunogenic peptide
CAISGGVRSTYNEQ	HLA-B*08:01	HSKKKCDEL	McPAS_TBA	Immunogenic peptide
CAISGMGQRDNEQ	HLA-B*08:01	HSKKKCDEL	McPAS_TBA	Immunogenic peptide
CAISSGTKSTEA	HLA-B*08:01	HSKKKCDEL	McPAS_TBA	Immunogenic peptide
CAISVSGRSTDTQY	HLA-B*08:01	HSKKKCDEL	McPAS_IEDB_TBA_VDJdb	Immunogenic peptide
CASEAGTVNTNTQY	HLA-A*01:01	ATDALMTGY	McPAS_IEDB_TBA_VDJdb	Immunogenic peptide
CASIDRTIGNQPQH	HLA-A*01:01	ATDALMTGY	McPAS_IEDB_TBA_VDJdb	Immunogenic peptide
CASNPAGQLETQY	HLA-A*01:01	ATDALMTGY	McPAS_IEDB_TBA_VDJdb	Immunogenic peptide
CASQGGEIGNNEQ	HLA-A*01:01	ATDALMTGY	McPAS_TBA	Immunogenic peptide
CASRAGTSNTGEL	HLA-A*01:01	ATDALMTGY	McPAS_TBA	Immunogenic peptide
CASRGGTINTGEL	HLA-A*01:01	ATDALMTGY	McPAS_TBA	Immunogenic peptide
CASRPSGQLDEQ	HLA-A*01:01	ATDALMTGY	McPAS_TBA	Immunogenic peptide
CASRPTGQLETQY	HLA-A*01:01	ATDALMTGY	McPAS_IEDB_TBA_VDJdb	Immunogenic peptide
CASRSGTSNTGEL	HLA-A*01:01	ATDALMTGY	McPAS_TBA	Immunogenic peptide
CASRTGISNTGEL	HLA-A*01:01	ATDALMTGY	McPAS_TBA	Immunogenic peptide
CASRTGTSNTGEL	HLA-A*01:01	ATDALMTGY	McPAS_TBA	Immunogenic peptide
CASRWTGQLDEQ	HLA-A*01:01	ATDALMTGY	McPAS_TBA	Immunogenic peptide
CASSAGTINTGEL	HLA-A*01:01	ATDALMTGY	McPAS_TBA	Immunogenic peptide
CASSEAGQLNEQ	HLA-A*01:01	ATDALMTGY	McPAS_TBA	Immunogenic peptide
CASSEVGQLETQY	HLA-A*01:01	ATDALMTGY	McPAS_IEDB_TBA_VDJdb	Immunogenic peptide
CASSFSGQLDTIY	HLA-A*01:01	ATDALMTGY	McPAS_IEDB_TBA_VDJdb	Immunogenic peptide
CASSFTTMGNQPQH	HLA-A*01:01	ATDALMTGY	McPAS_IEDB_TBA_VDJdb	Immunogenic peptide
CASSHRQGGTGEL	HLA-B*08:01	HSKKKCDEL	McPAS_TBA	Immunogenic peptide
CASSHSRGSGNTIY	HLA-B*08:01	HSKKKCDEL	McPAS_IEDB_TBA_VDJdb	Immunogenic peptide
CASSIRDAGNQPQH	HLA-A*01:01	ATDALMTGY	McPAS_IEDB_TBA_VDJdb	Immunogenic peptide
CASSLLGQLYEQY	HLA-A*01:01	ATDALMTGY	McPAS_IEDB_TBA_VDJdb	Immunogenic peptide
CASSLRGRGDQPQH	HLA-B*08:01	HSKKKCDEL	McPAS_IEDB_TBA_VDJdb	Immunogenic peptide
CASSLSGQLDEQ	HLA-A*01:01	ATDALMTGY	McPAS_TBA	Immunogenic peptide
CASSLSGQLDEQY	HLA-A*01:01	ATDALMTGY	McPAS_IEDB_TBA_VDJdb	Immunogenic peptide
CASSLSGQLDTQY	HLA-A*01:01	ATDALMTGY	McPAS_IEDB_TBA_VDJdb	Immunogenic peptide
CASSLVGQLDEQY	HLA-A*01:01	ATDALMTGY	McPAS_IEDB_TBA_VDJdb	Immunogenic peptide
CASSLVGQLETQY	HLA-A*01:01	ATDALMTGY	McPAS_IEDB_TBA_VDJdb	Immunogenic peptide
CASSLVGQLYEQY	HLA-A*01:01	ATDALMTGY	McPAS_IEDB_TBA_VDJdb	Immunogenic peptide
CASSNRQGGTGEL	HLA-B*08:01	HSKKKCDEL	McPAS_TBA	Immunogenic peptide
CASSPGDTGANVLT	HLA-A*01:01	ATDALMTGY	McPAS_IEDB_TBA_VDJdb	Immunogenic peptide
CASSPGPQRGGLETQY	HLA-B*08:01	HSKKKCDEL	McPAS_IEDB_TBA_VDJdb	Immunogenic peptide
CASSPREIGNQPQH	HLA-A*01:01	ATDALMTGY	McPAS_IEDB_TBA_VDJdb	Immunogenic peptide
CASSPRQGGTGEL	HLA-B*08:01	HSKKKCDEL	McPAS_TBA	Immunogenic peptide
CASSPSGQLDEQ	HLA-A*01:01	ATDALMTGY	McPAS_TBA	Immunogenic peptide
CASSPSGQLETQY	HLA-A*01:01	ATDALMTGY	McPAS_IEDB_TBA_VDJdb	Immunogenic peptide
CASSPTGQLETQY	HLA-A*01:01	ATDALMTGY	McPAS_IEDB_TBA_VDJdb	Immunogenic peptide
CASSQGPPGLAQETQY	HLA-B*08:01	HSKKKCDEL	McPAS_IEDB_TBA_VDJdb	Immunogenic peptide
CASSQGPPGTTRETQY	HLA-B*08:01	HSKKKCDEL	McPAS_IEDB_TBA_VDJdb	Immunogenic peptide
CASSQSGQLDTQY	HLA-A*01:01	ATDALMTGY	McPAS_IEDB_TBA_VDJdb	Immunogenic peptide
CASSQSRGSGNTIY	HLA-B*08:01	HSKKKCDEL	McPAS_IEDB_TBA_VDJdb	Immunogenic peptide
CASSQTGQLDEQY	HLA-A*01:01	ATDALMTGY	McPAS_IEDB_TBA_VDJdb	Immunogenic peptide
CASSRLTVDRSDTGEL	HLA-B*08:01	HSKKKCDEL	McPAS_TBA	Immunogenic peptide
CASSRRGATTSTDTQY	HLA-B*08:01	HSKKKCDEL	McPAS_IEDB_TBA_VDJdb	Immunogenic peptide
CASSRRGRDDEKL	HLA-B*08:01	HSKKKCDEL	McPAS_TBA	Immunogenic peptide
CASSRRQGAMRETQY	HLA-B*08:01	HSKKKCDEL	McPAS_IEDB_TBA_VDJdb	Immunogenic peptide
CASSSGATGANVLT	HLA-A*01:01	ATDALMTGY	McPAS_IEDB_TBA_VDJdb	Immunogenic peptide
CASSSGTIGANVLT	HLA-A*01:01	ATDALMTGY	McPAS_IEDB_TBA_VDJdb	Immunogenic peptide
CASSSGTINTGEL	HLA-A*01:01	ATDALMTGY	McPAS_TBA	Immunogenic peptide
CASSSGTVNTGEL	HLA-A*01:01	ATDALMTGY	McPAS_TBA	Immunogenic peptide
CASSSGVSGANVLT	HLA-A*01:01	ATDALMTGY	McPAS_IEDB_TBA_VDJdb	Immunogenic peptide
CASSSIATGANVLT	HLA-A*01:01	ATDALMTGY	McPAS_IEDB_TBA_VDJdb	Immunogenic peptide
CASSSLGQLETQY	HLA-A*01:01	ATDALMTGY	McPAS_IEDB_TBA_VDJdb	Immunogenic peptide
CASSSRGQLDTQY	HLA-A*01:01	ATDALMTGY	McPAS_IEDB_TBA_VDJdb	Immunogenic peptide
CASSSRQGGTGEL	HLA-B*08:01	HSKKKCDEL	McPAS_TBA	Immunogenic peptide
CASSSSGQLDEQ	HLA-A*01:01	ATDALMTGY	McPAS_TBA	Immunogenic peptide
CASSSTDTGANVLT	HLA-A*01:01	ATDALMTGY	McPAS_IEDB_TBA_VDJdb	Immunogenic peptide
CASSTGTSNTGEL	HLA-A*01:01	ATDALMTGY	McPAS_TBA	Immunogenic peptide
CASSYRGQLNEQ	HLA-A*01:01	ATDALMTGY	McPAS_TBA	Immunogenic peptide
CASSYVGQLDEQ	HLA-A*01:01	ATDALMTGY	McPAS_TBA	Immunogenic peptide
CASTTGTIGNQPQH	HLA-A*01:01	ATDALMTGY	McPAS_IEDB_TBA_VDJdb	Immunogenic peptide
CATTVGVIGNQPQH	HLA-A*01:01	ATDALMTGY	McPAS_IEDB_TBA_VDJdb	Immunogenic peptide
CAVRLMENYGYT	HLA-B*08:01	HSKKKCDEL	McPAS_IEDB_TBA_VDJdb	Immunogenic peptide
CAIKTTSGIVDEQ	HLA-A*02:01	NLVPMVATV	McPAS	Immunogenic peptide
CAISDMSWEQY	HLA-A*02:01	NLVPMVATV	McPAS	Immunogenic peptide
CAISETSEHYEQY	HLA-A*02:01	NLVPMVATV	McPAS	Immunogenic peptide
CASGSGLAGGEL	HLA-A*02:01	NLVPMVATV	McPAS	Immunogenic peptide
CASKSLETGFNQPQH	HLA-A*02:01	NLVPMVATV	McPAS	Immunogenic peptide
CASLSPIRDRGTGEL	HLA-A*02:01	NLVPMVATV	McPAS	Immunogenic peptide
CASNNGKYEQY	HLA-A*02:01	NLVPMVATV	McPAS	Immunogenic peptide
CASRKTVTAYNSPLH	HLA-A*02:01	NLVPMVATV	McPAS	Immunogenic peptide
CASSADGMNTEA	HLA-A*02:01	NLVPMVATV	McPAS	Immunogenic peptide
CASSAGLLGEQY	HLA-A*02:01	NLVPMVATV	McPAS	Immunogenic peptide
CASSFGTFGAYGYT	HLA-A*02:01	NLVPMVATV	McPAS	Immunogenic peptide
CASSFKGADTQY	HLA-A*02:01	NLVPMVATV	McPAS	Immunogenic peptide
CASSFLAGGNNEQ	HLA-A*02:01	NLVPMVATV	McPAS	Immunogenic peptide
CASSLAGGTAHTEA	HLA-A*02:01	NLVPMVATV	McPAS	Immunogenic peptide
CASSLAQTTPLNEQ	HLA-A*02:01	NLVPMVATV	McPAS	Immunogenic peptide
CASSLARRTGGVYNEQ	HLA-A*02:01	NLVPMVATV	McPAS	Immunogenic peptide
CASSLGENIQY	HLA-A*02:01	NLVPMVATV	McPAS	Immunogenic peptide
CASSLGTSGTDEQ	HLA-A*02:01	NLVPMVATV	McPAS	Immunogenic peptide
CASSLGWGLLSYNEQ	HLA-A*02:01	NLVPMVATV	McPAS	Immunogenic peptide
CASSLHGEL	HLA-A*02:01	NLVPMVATV	McPAS	Immunogenic peptide
CASSLPETSGGLDEQ	HLA-A*02:01	NLVPMVATV	McPAS	Immunogenic peptide
CASSLREGNTEA	HLA-A*02:01	NLVPMVATV	McPAS	Immunogenic peptide
CASSLSGGAGEL	HLA-A*02:01	NLVPMVATV	McPAS	Immunogenic peptide
CASSLSTSGSSYNEQ	HLA-A*02:01	NLVPMVATV	McPAS	Immunogenic peptide
CASSLVANEQ	HLA-A*02:01	NLVPMVATV	McPAS	Immunogenic peptide
CASSLVEAGDPYEQY	HLA-A*02:01	NLVPMVATV	McPAS	Immunogenic peptide
CASSLWEGREQ	HLA-A*02:01	NLVPMVATV	McPAS	Immunogenic peptide
CASSPGLAASYNEQ	HLA-A*02:01	NLVPMVATV	McPAS	Immunogenic peptide
CASSPSSAALEL	HLA-A*02:01	NLVPMVATV	McPAS	Immunogenic peptide
CASSPTTQGSYEQY	HLA-A*02:01	NLVPMVATV	McPAS	Immunogenic peptide
CASSQEGSGGTEA	HLA-A*02:01	NLVPMVATV	McPAS	Immunogenic peptide
CASSQEPNNNEQ	HLA-A*02:01	NLVPMVATV	McPAS	Immunogenic peptide
CASSQVTSTDTQY	HLA-A*02:01	NLVPMVATV	McPAS	Immunogenic peptide
CASSRDRDLNQPQH	HLA-A*02:01	NLVPMVATV	McPAS	Immunogenic peptide
CASSSFGNREYEQY	HLA-A*02:01	NLVPMVATV	McPAS	Immunogenic peptide
CASSSGQLSNTGEL	HLA-A*02:01	NLVPMVATV	McPAS	Immunogenic peptide
CASSSTGDFSYEQY	HLA-A*02:01	NLVPMVATV	McPAS	Immunogenic peptide
CASSTLAGVHYNEQ	HLA-A*02:01	NLVPMVATV	McPAS	Immunogenic peptide
CASSVALGLNYEQY	HLA-A*02:01	NLVPMVATV	McPAS	Immunogenic peptide
CASSVVGAADTQY	HLA-A*02:01	NLVPMVATV	McPAS	Immunogenic peptide
CASSYRQENTEA	HLA-A*02:01	NLVPMVATV	McPAS	Immunogenic peptide
CASTSWAQASTDTQY	HLA-A*02:01	NLVPMVATV	McPAS	Immunogenic peptide
CASTVDSLDTEA	HLA-A*02:01	NLVPMVATV	McPAS	Immunogenic peptide
CATSDLGQGLDNEQ	HLA-A*02:01	NLVPMVATV	McPAS	Immunogenic peptide
CSAPDLFGQGIETQY	HLA-A*02:01	NLVPMVATV	McPAS	Immunogenic peptide
CSAQSGLAGGSLQETQY	HLA-A*02:01	NLVPMVATV	McPAS	Immunogenic peptide
CSARDAGLAGLNGAPSSYEQY	HLA-A*02:01	NLVPMVATV	McPAS	Immunogenic peptide
CSARDPFGTGYLNSNQPQH	HLA-A*02:01	NLVPMVATV	McPAS	Immunogenic peptide
CSAREPDDTREA	HLA-A*02:01	NLVPMVATV	McPAS	Immunogenic peptide
CSARGDTGTGYEQY	HLA-A*02:01	NLVPMVATV	McPAS	Immunogenic peptide
CSARHDLGQGYEQY	HLA-A*02:01	NLVPMVATV	McPAS	Immunogenic peptide
CSARTTYGTDIISQH	HLA-A*02:01	NLVPMVATV	McPAS	Immunogenic peptide
CSARVVPGVQETQY	HLA-A*02:01	NLVPMVATV	McPAS	Immunogenic peptide
CSAWDSYTGEL	HLA-A*02:01	NLVPMVATV	McPAS	Immunogenic peptide
CSVADSTYEQY	HLA-A*02:01	NLVPMVATV	McPAS	Immunogenic peptide
CSVEEWASRYNEQ	HLA-A*02:01	NLVPMVATV	McPAS	Immunogenic peptide
CSVEIWDSSYNEQ	HLA-A*02:01	NLVPMVATV	McPAS	Immunogenic peptide
CSVGRLGLPYNEQ	HLA-A*02:01	NLVPMVATV	McPAS	Immunogenic peptide
CSVGTSEAYEQY	HLA-A*02:01	NLVPMVATV	McPAS	Immunogenic peptide
CSVLGQDSYEQY	HLA-A*02:01	NLVPMVATV	McPAS	Immunogenic peptide
CSVQGGSTEA	HLA-A*02:01	NLVPMVATV	McPAS	Immunogenic peptide
CSVRDRASYEQY	HLA-A*02:01	NLVPMVATV	McPAS	Immunogenic peptide
CACSSLNTEA	HLA-B*08:01	RAKFKQLL	McPAS	Immunogenic peptide
CAGSLSWGGFYNEQ	HLA-B*07:02	TPRVTGGGAM	McPAS	Immunogenic peptide
CAGSSLNTEA	HLA-B*08:01	RAKFKQLL	McPAS_IEDB	Immunogenic peptide
CARSWAGGPRDEQY	HLA-A*02:01	NLVPMVATV	McPAS_IEDB_TBA_VDJdb	Immunogenic peptide
CASFRGHEQ	HLA-A*02:01	NLVPMVATV	McPAS	Immunogenic peptide
CASGLSDRGGDEQ	HLA-A*02:01	NLVPMVATV	McPAS	Immunogenic peptide
CASMNDGATYEQY	HLA-A*02:01	NLVPMVATV	McPAS_IEDB_TBA_VDJdb	Immunogenic peptide
CASNTGGANTDTQY	HLA-B*07:02	TPRVTGGGAM	McPAS_IEDB_TBA_VDJdb	Immunogenic peptide
CASPLIEETIPYEQY	HLA-B*07:02	TPRVTGGGAM	McPAS_IEDB_TBA_VDJdb	Immunogenic peptide
CASRALRGDNEQ	HLA-A*02:01	NLVPMVATV	McPAS	Immunogenic peptide
CASREGEYYGYT	HLA-A*02:01	NLVPMVATV	McPAS_IEDB_TBA_VDJdb	Immunogenic peptide
CASRLGAAGSQPQH	HLA-B*07:02	TPRVTGGGAM	McPAS_IEDB_TBA_VDJdb	Immunogenic peptide
CASRLGLGYEQY	HLA-A*02:01	NLVPMVATV	McPAS_IEDB_TBA_VDJdb	Immunogenic peptide
CASRLGPGQPYEQY	HLA-B*07:02	TPRVTGGGAM	McPAS_IEDB_TBA_VDJdb	Immunogenic peptide
CASRLGPGQPYERY	HLA-B*07:02	TPRVTGGGAM	McPAS_IEDB_TBA_VDJdb	Immunogenic peptide
CASRQGAGGNQPQH	HLA-B*07:02	TPRVTGGGAM	McPAS_IEDB_TBA_VDJdb	Immunogenic peptide
CASRSGPGQPYEQY	HLA-B*07:02	TPRVTGGGAM	McPAS_IEDB_TBA_VDJdb	Immunogenic peptide
CASRSGTYDNSPLH	HLA-A*02:01	NLVPMVATV	McPAS_IEDB_TBA_VDJdb	Immunogenic peptide
CASRTGAANIYEQH	HLA-B*07:02	TPRVTGGGAM	McPAS	Immunogenic peptide
CASRTGAANIYEQY	HLA-B*07:02	TPRVTGGGAM	McPAS_IEDB_TBA_VDJdb	Immunogenic peptide
CASRVGGAGNSPLH	HLA-B*07:02	TPRVTGGGAM	McPAS_IEDB_TBA_VDJdb	Immunogenic peptide
CASSAGTGIYDEA	HLA-B*07:02	TPRVTGGGAM	McPAS	Immunogenic peptide
CASSAGTGIYDGA	HLA-B*07:02	TPRVTGGGAM	McPAS	Immunogenic peptide
CASSARQGIDTGEL	HLA-B*07:02	TPRVTGGGAM	McPAS	Immunogenic peptide
CASSCAGGPRDEQY	HLA-A*02:01	NLVPMVATV	McPAS_IEDB_TBA_VDJdb	Immunogenic peptide
CASSDPDRAVTEA	HLA-A*02:01	NLVPMVATV	McPAS	Immunogenic peptide
CASSDQSQETQY	HLA-B*07:02	TPRVTGGGAM	McPAS_IEDB_TBA_VDJdb	Immunogenic peptide
CASSFGQAWETQY	HLA-A*02:01	NLVPMVATV	McPAS_IEDB_TBA_VDJdb	Immunogenic peptide
CASSFGQAWYEQY	HLA-A*02:01	NLVPMVATV	McPAS_IEDB_TBA_VDJdb	Immunogenic peptide
CASSFRGEGHPDTQY	HLA-B*07:02	TPRVTGGGAM	McPAS_IEDB_TBA_VDJdb	Immunogenic peptide
CASSFYSSGRNSY	HLA-A*02:01	NLVPMVATV	McPAS_IEDB_TBA_VDJdb	Immunogenic peptide
CASSGVGGTDTQY	HLA-A*02:01	NLVPMVATV	McPAS_IEDB_TBA_VDJdb	Immunogenic peptide
CASSLAERSYEQY	HLA-A*02:01	NLVPMVATV	McPAS_IEDB_TBA_VDJdb	Immunogenic peptide
CASSLAGRETEA	HLA-A*02:01	NLVPMVATV	McPAS	Immunogenic peptide
CASSLAPGDGYEQY	HLA-A*02:01	NLVPMVATV	McPAS_IEDB_TBA_VDJdb	Immunogenic peptide
CASSLAWGGFYNEQ	HLA-B*07:02	TPRVTGGGAM	McPAS	Immunogenic peptide
CASSLDGRQVNQPQH	HLA-B*08:01	RAKFKQLL	McPAS_IEDB_TBA_VDJdb	Immunogenic peptide
CASSLDRDRGRPEA	HLA-A*02:01	NLVPMVATV	McPAS	Immunogenic peptide
CASSLGAGNYGYT	HLA-B*07:02	TPRVTGGGAM	McPAS_IEDB_TBA_VDJdb	Immunogenic peptide
CASSLGGSPNYGYT	HLA-B*07:02	TPRVTGGGAM	McPAS_IEDB_TBA_VDJdb	Immunogenic peptide
CASSLGLAATYNEQ	HLA-A*02:01	NLVPMVATV	McPAS	Immunogenic peptide
CASSLGPGNYEQY	HLA-B*07:02	TPRVTGGGAM	McPAS_TBA_VDJdb	Immunogenic peptide
CASSLGQAYEQY	HLA-B*08:01	FLRGRAYGL	McPAS_IEDB_TBA_VDJdb	Immunogenic peptide
CASSLGSSGNEQ	HLA-B*07:02	TPRVTGGGAM	McPAS	Immunogenic peptide
CASSLGSSGTRQY	HLA-B*07:02	TPRVTGGGAM	McPAS_IEDB_TBA_VDJdb	Immunogenic peptide
CASSLIGQGLGDEQ	HLA-B*07:02	TPRVTGGGAM	McPAS	Immunogenic peptide
CASSLIGVSSYNEQ	HLA-B*07:02	TPRVTGGGAM	McPAS	Immunogenic peptide
CASSLIPGDYYGYT	HLA-B*08:01	RAKFKQLL	McPAS_IEDB_TBA_VDJdb	Immunogenic peptide
CASSLISGRARNEQ	HLA-B*07:02	TPRVTGGGAM	McPAS	Immunogenic peptide
CASSLKGVGQSDEQY	HLA-B*07:02	TPRVTGGGAM	McPAS_TBA_VDJdb	Immunogenic peptide
CASSLLGGGYAYEQY	HLA-B*08:01	RAKFKQLL	McPAS_IEDB_TBA_VDJdb	Immunogenic peptide
CASSLLGLQGSYNEQ	HLA-B*07:02	TPRVTGGGAM	McPAS	Immunogenic peptide
CASSLLQGARTEA	HLA-B*07:02	TPRVTGGGAM	McPAS	Immunogenic peptide
CASSLLTGHEQ	HLA-B*08:01	RAKFKQLL	McPAS	Immunogenic peptide
CASSLMGPGQPQH	HLA-A*02:01	NLVPMVATV	McPAS_IEDB_TBA_VDJdb	Immunogenic peptide
CASSLRGENRDDYEQY	HLA-B*07:02	TPRVTGGGAM	McPAS_IEDB_TBA_VDJdb	Immunogenic peptide
CASSLRGESLVNEQ	HLA-B*07:02	TPRVTGGGAM	McPAS	Immunogenic peptide
CASSLRGVSSYNEQ	HLA-B*07:02	TPRVTGGGAM	McPAS	Immunogenic peptide
CASSLRPLDMNTEA	HLA-A*02:01	NLVPMVATV	McPAS	Immunogenic peptide
CASSLRQGAGEL	HLA-B*07:02	TPRVTGGGAM	McPAS	Immunogenic peptide
CASSLRQGANTGEL	HLA-B*07:02	TPRVTGGGAM	McPAS	Immunogenic peptide
CASSLRQGEGMGEQ	HLA-A*02:01	NLVPMVATV	McPAS	Immunogenic peptide
CASSLRQGINTGEL	HLA-B*07:02	TPRVTGGGAM	McPAS	Immunogenic peptide
CASSLSDRGGDEQ	HLA-A*02:01	NLVPMVATV	McPAS	Immunogenic peptide
CASSLSLLAGNNEQ	HLA-A*02:01	NLVPMVATV	McPAS	Immunogenic peptide
CASSLSPSTGNYGYT	HLA-B*07:02	TPRVTGGGAM	McPAS_IEDB_TBA_VDJdb	Immunogenic peptide
CASSLSTSSRNYGYT	HLA-B*07:02	TPRVTGGGAM	McPAS_IEDB_TBA_VDJdb	Immunogenic peptide
CASSLSWGGFYNEQ	HLA-B*07:02	TPRVTGGGAM	McPAS	Immunogenic peptide
CASSLSWGGFYNEQL	HLA-B*07:02	TPRVTGGGAM	McPAS_IEDB	Immunogenic peptide
CASSLTNEQ	HLA-A*02:01	NLVPMVATV	McPAS	Immunogenic peptide
CASSLTSEQ	HLA-A*02:01	NLVPMVATV	McPAS	Immunogenic peptide
CASSLVGTGGWDEQ	HLA-A*02:01	NLVPMVATV	McPAS	Immunogenic peptide
CASSPAAAYEQY	HLA-B*08:01	FLRGRAYGL	McPAS	Immunogenic peptide
CASSPGSSFYGYP	HLA-A*02:01	NLVPMVATV	McPAS_IEDB	Immunogenic peptide
CASSPGTGREQ	HLA-A*02:01	NLVPMVATV	McPAS	Immunogenic peptide
CASSPGTLKETQY	HLA-A*02:01	NLVPMVATV	McPAS_IEDB_TBA_VDJdb	Immunogenic peptide
CASSPLTDTQY	HLA-B*08:01	RAKFKQLL	McPAS_IEDB_TBA_VDJdb	Immunogenic peptide
CASSPLTGTGHYGYT	HLA-A*02:01	NLVPMVATV	McPAS_IEDB_TBA_VDJdb	Immunogenic peptide
CASSPPLGSGSGDEKL	HLA-B*07:02	TPRVTGGGAM	McPAS	Immunogenic peptide
CASSPRTLGTEA	HLA-B*08:01	FLRGRAYGL	McPAS	Immunogenic peptide
CASSPSAAAYEQY	HLA-B*08:01	FLRGRAYGL	McPAS_IEDB_TBA_VDJdb	Immunogenic peptide
CASSPSGANVLT	HLA-B*08:01	RAKFKQLL	McPAS_IEDB_TBA_VDJdb	Immunogenic peptide
CASSRRGESSYNEQ	HLA-B*07:02	TPRVTGGGAM	McPAS	Immunogenic peptide
CASSSHDKQGARSPLH	HLA-B*07:02	TPRVTGGGAM	McPAS_IEDB_TBA_VDJdb	Immunogenic peptide
CASSSHDLAGVKSEQ	HLA-B*07:02	TPRVTGGGAM	McPAS	Immunogenic peptide
CASSSHEDRGSSSPLH	HLA-B*07:02	TPRVTGGGAM	McPAS_IEDB_TBA_VDJdb	Immunogenic peptide
CASSSLDTEA	HLA-B*08:01	RAKFKQLL	McPAS	Immunogenic peptide
CASSSLNTEA	HLA-B*08:01	RAKFKQLL	McPAS	Immunogenic peptide
CASSSLSTEA	HLA-B*08:01	RAKFKQLL	McPAS	Immunogenic peptide
CASSSPNTEA	HLA-B*08:01	RAKFKQLL	McPAS	Immunogenic peptide
CASSSRDRGAYEQY	HLA-B*07:02	TPRVTGGGAM	McPAS_IEDB_TBA_VDJdb	Immunogenic peptide
CASSSVNEQ	HLA-A*02:01	NLVPMVATV	McPAS_IEDB	Immunogenic peptide
CASSTGQAYEQY	HLA-B*08:01	FLRGRAYGL	McPAS_IEDB_TBA_VDJdb	Immunogenic peptide
CASSTRGGWVEA	HLA-B*08:01	RAKFKQLL	McPAS	Immunogenic peptide
CASSTSLLAGNNEQ	HLA-A*02:01	NLVPMVATV	McPAS	Immunogenic peptide
CASSVAGSATGEL	HLA-A*02:01	NLVPMVATV	McPAS	Immunogenic peptide
CASSVGAGVFTDTQY	HLA-A*02:01	NLVPMVATV	McPAS_IEDB_TBA_VDJdb	Immunogenic peptide
CASSVGSEAYTYEQY	HLA-A*02:01	NLVPMVATV	McPAS_IEDB_TBA_VDJdb	Immunogenic peptide
CASSWAGEPRDEQY	HLA-A*02:01	NLVPMVATV	McPAS_IEDB_TBA_VDJdb	Immunogenic peptide
CASSWAGGPRDEQY	HLA-A*02:01	NLVPMVATV	McPAS_IEDB_TBA_VDJdb	Immunogenic peptide
CASSYQTGASYGYT	HLA-A*02:01	NLVPMVATV	McPAS_IEDB_TBA_VDJdb	Immunogenic peptide
CASSYSTGIGGGYT	HLA-A*02:01	NLVPMVATV	McPAS_IEDB_TBA_VDJdb	Immunogenic peptide
CASSYSTVNEQ	HLA-B*07:02	TPRVTGGGAM	McPAS	Immunogenic peptide
CASTPQTGTGTYGYT	HLA-A*02:01	NLVPMVATV	McPAS_IEDB_TBA_VDJdb	Immunogenic peptide
CASVNDGATYEQY	HLA-A*02:01	NLVPMVATV	McPAS_IEDB_TBA_VDJdb	Immunogenic peptide
CATSIGSSGNEQ	HLA-B*07:02	TPRVTGGGAM	McPAS	Immunogenic peptide
CSAGQGEGEQY	HLA-B*08:01	RAKFKQLL	McPAS_IEDB_TBA_VDJdb	Immunogenic peptide
CSAGTGEGGEQ	HLA-B*08:01	RAKFKQLL	McPAS	Immunogenic peptide
CSAHRTENTEA	HLA-A*02:01	GLCTLVAML	McPAS	Immunogenic peptide
CSAPSLLNTEA	HLA-A*02:01	GLCTLVAML	McPAS	Immunogenic peptide
CSARDGTGNGYT	HLA-A*02:01	GLCTLVAML	McPAS_IEDB_TBA_VDJdb	Immunogenic peptide
CSARDRTGNGYT	HLA-A*02:01	GLCTLVAML	McPAS_IEDB_TBA_VDJdb_10X	Immunogenic peptide
CSARDRTGNTIY	HLA-A*02:01	GLCTLVAML	McPAS_IEDB_TBA_VDJdb	Immunogenic peptide
CSARDRVGNTIY	HLA-A*02:01	GLCTLVAML	McPAS_IEDB_TBA_VDJdb	Immunogenic peptide
CSARDSTGKGYT	HLA-A*02:01	GLCTLVAML	McPAS	Immunogenic peptide
CSARGGTGNGYT	HLA-A*02:01	GLCTLVAML	McPAS_IEDB_TBA_VDJdb	Immunogenic peptide
CSARSEVGDTIY	HLA-A*02:01	GLCTLVAML	McPAS_IEDB_TBA_VDJdb	Immunogenic peptide
CSARSEVGNTIY	HLA-A*02:01	GLCTLVAML	McPAS_IEDB_TBA_VDJdb	Immunogenic peptide
CSARSGVGNTIY	HLA-A*02:01	GLCTLVAML	McPAS_IEDB_TBA_VDJdb	Immunogenic peptide
CSARVEPGNGYT	HLA-A*02:01	GLCTLVAML	McPAS_IEDB_TBA_VDJdb	Immunogenic peptide
CSATDSMNTEA	HLA-A*02:01	GLCTLVAML	McPAS	Immunogenic peptide
CSGGQGEGEQ	HLA-B*08:01	RAKFKQLL	McPAS	Immunogenic peptide
CSGGQGEGEQY	HLA-B*08:01	RAKFKQLL	McPAS_IEDB_TBA_VDJdb	Immunogenic peptide
CSGGQGGGEQ	HLA-B*08:01	RAKFKQLL	McPAS	Immunogenic peptide
CSSGTGDGGEQ	HLA-B*08:01	RAKFKQLL	McPAS	Immunogenic peptide
CSTGQGPYEQY	HLA-B*08:01	RAKFKQLL	McPAS_IEDB_TBA_VDJdb	Immunogenic peptide
CSTGSGEGYEQY	HLA-B*08:01	RAKFKQLL	McPAS_IEDB	Immunogenic peptide
CSVDLANTEA	HLA-A*02:01	GLCTLVAML	McPAS	Immunogenic peptide
CSVDLATEA	HLA-A*02:01	GLCTLVAML	McPAS	Immunogenic peptide
CSVEASEGLFNEQ	HLA-A*02:01	GLCTLVAML	McPAS	Immunogenic peptide
CSVEASGGLFNEQ	HLA-A*02:01	GLCTLVAML	McPAS	Immunogenic peptide
CSVETGDEKL	HLA-B*08:01	RAKFKQLL	McPAS	Immunogenic peptide
CSVEYSPTLYNEQ	HLA-A*02:01	GLCTLVAML	McPAS	Immunogenic peptide
CSVGAGDYEQY	HLA-B*08:01	RAKFKQLL	McPAS_IEDB_VDJdb_10X	Immunogenic peptide
CSVGAGEGGPQH	HLA-B*08:01	RAKFKQLL	McPAS_IEDB_TBA_VDJdb	Immunogenic peptide
CSVGAGEGYEQY	HLA-B*08:01	RAKFKQLL	McPAS_IEDB_TBA_VDJdb	Immunogenic peptide
CSVGFGEGYEQY	HLA-B*08:01	RAKFKQLL	McPAS_IEDB_TBA_VDJdb	Immunogenic peptide
CSVGGGTEA	HLA-B*08:01	RAKFKQLL	McPAS	Immunogenic peptide
CSVGGTFYGYT	HLA-A*02:01	GLCTLVAML	McPAS_IEDB_TBA_VDJdb	Immunogenic peptide
CSVGGVSSGVYNEQ	HLA-B*08:01	RAKFKQLL	McPAS	Immunogenic peptide
CSVGPGENGPQH	HLA-B*08:01	RAKFKQLL	McPAS	Immunogenic peptide
CSVGQGEDGPQH	HLA-B*08:01	RAKFKQLL	McPAS_IEDB_TBA_VDJdb	Immunogenic peptide
CSVGQGGNYGYT	HLA-B*08:01	RAKFKQLL	McPAS_IEDB_TBA_VDJdb	Immunogenic peptide
CSVGQGGTNEKL	HLA-A*02:01	GLCTLVAML	McPAS	Immunogenic peptide
CSVGSGEDNEQ	HLA-B*08:01	RAKFKQLL	McPAS	Immunogenic peptide
CSVGSGGTNERL	HLA-A*02:01	GLCTLVAML	McPAS	Immunogenic peptide
CSVGTGDNSPLH	HLA-B*08:01	RAKFKQLL	McPAS_IEDB_TBA_VDJdb	Immunogenic peptide
CSVKGGFPYNEQ	HLA-B*08:01	RAKFKQLL	McPAS	Immunogenic peptide
CSVKGQGTEA	HLA-B*08:01	RAKFKQLL	McPAS	Immunogenic peptide
CSVKGTNTEA	HLA-B*08:01	RAKFKQLL	McPAS	Immunogenic peptide
CSVPGQVLETQY	HLA-A*02:01	GLCTLVAML	McPAS_IEDB_TBA_VDJdb	Immunogenic peptide
CSVPGTDYNEQ	HLA-A*02:01	GLCTLVAML	McPAS	Immunogenic peptide
CSVPSLLNTEA	HLA-A*02:01	GLCTLVAML	McPAS	Immunogenic peptide
CSVQEGGYGYT	HLA-A*02:01	GLCTLVAML	McPAS_IEDB_TBA_VDJdb	Immunogenic peptide
CSVTAGEDDTQY	HLA-B*08:01	RAKFKQLL	McPAS_IEDB_TBA_VDJdb	Immunogenic peptide
CSVTAGEDQPQH	HLA-B*08:01	RAKFKQLL	McPAS_IEDB_TBA_VDJdb	Immunogenic peptide
CSVTSERTGTNWGYT	HLA-B*08:01	RAKFKQLL	McPAS_IEDB	Immunogenic peptide
CSVTSERTGTTWGYT	HLA-B*08:01	RAKFKQLL	McPAS_IEDB	Immunogenic peptide
CSYSPGQGRNEQ	HLA-B*08:01	RAKFKQLL	McPAS	Immunogenic peptide
CAGSQEFLNRRY	HLA-B*08:01	EIYKRWII	McPAS_TBA_VDJdb	Immunogenic peptide
CAIGGHDYGYT	HLA-B*57:01	KAFSPEVIPMF	McPAS_IEDB_TBA_VDJdb	Immunogenic peptide
CAIRPFLGQDDNYGYT	HLA-B*08:01	FLKEKGGL	McPAS_TBA_VDJdb	Immunogenic peptide
CAISECAIRGTSGLTDTQY	HLA-B*57:03	TQGYFPDWQNY	McPAS_TBA	Immunogenic peptide
CAISERAIRGTSGLTDTQY	HLA-B*57:03	TQGYFPDWQNY	McPAS_TBA	Immunogenic peptide
CAISERAIRGTSGLTDTQYL	HLA-B*57:03	TQGYFPDWQNY	McPAS_TBA	Immunogenic peptide
CAISESGGRVDEQY	HLA-B*15:01	GLNKIVRMY	McPAS_TBA_VDJdb	Immunogenic peptide
CALTGGDYGYT	HLA-B*57:01	KAFSPEVIPMF	McPAS_IEDB_TBA_VDJdb	Immunogenic peptide
CASELSGNTIY	HLA-B*08:01	EIYKRWII	McPAS_TBA	Immunogenic peptide
CASGGEFYGYT	HLA-B*57:01	KAFSPEVIPMF	McPAS_IEDB_TBA_VDJdb	Immunogenic peptide
CASKEELSNTGEL	HLA-B*08:01	FLKEKGGL	McPAS_TBA	Immunogenic peptide
CASPHPDRPNYGYT	HLA-B*57:01	KAFSPEVIPMF	McPAS_IEDB_TBA_VDJdb	Immunogenic peptide
CASRGGSGEL	HLA-B*08:01	FLKEKGGL	McPAS_TBA	Immunogenic peptide
CASRKGQGDWEA	HLA-B*27:01	KRWIIMGLNK	McPAS_TBA	Immunogenic peptide
CASRLGRLAYEQY	HLA-B*08:01	EIYKRWII	McPAS_TBA	Immunogenic peptide
CASRPGQGGYEQY	HLA-B*57:03	ISPRTLNAW	McPAS	Immunogenic peptide
CASRSPLGYEQY	HLA-B*57:03	ISPRTLNAW	McPAS	Immunogenic peptide
CASRTQRWETQY	HLA-B*57:03	ISPRTLNAW	McPAS	Immunogenic peptide
CASRTQRWETQY	HLA-B*57:01	QASQEVKNW	McPAS_TBA_VDJdb	Immunogenic peptide
CASSADGSFYEQY	HLA-B*08:01	EIYKRWII	McPAS_TBA_VDJdb	Immunogenic peptide
CASSDGTGVGLGYT	HLA-B*57:01	KAFSPEVIPMF	McPAS_IEDB_TBA_VDJdb	Immunogenic peptide
CASSDNGGDRSPGEL	HLA-B*08:01	EIYKRWII	McPAS_TBA	Immunogenic peptide
CASSEAGGTEA	HLA-B*08:01	EIYKRWII	McPAS_TBA	Immunogenic peptide
CASSELGARVYEQY	HLA-B*08:01	FLKEKGGL	McPAS_TBA_VDJdb	Immunogenic peptide
CASSELGATIYEQY	HLA-B*57:01	KAFSPEVIPMF	McPAS_TBA	Immunogenic peptide
CASSEPPGVRGEA	HLA-B*08:01	EIYKRWII	McPAS_TBA	Immunogenic peptide
CASSESSREVSYNSPLH	HLA-B*08:01	FLKEKGGL	McPAS_TBA_VDJdb	Immunogenic peptide
CASSFIPGQGTHYSNQPQH	HLA-B*08:01	FLKEKGGL	McPAS_TBA_VDJdb	Immunogenic peptide
CASSGPGGEQY	HLA-B*57:01	KAFSPEVIPMF	McPAS_IEDB_TBA_VDJdb	Immunogenic peptide
CASSIAGGGEDTQY	HLA-B*27:01	KRWIIMGLNK	McPAS_TBA	Immunogenic peptide
CASSIQGLRATNEKL	HLA-B*57:03	ISPRTLNAW	McPAS	Immunogenic peptide
CASSKGRYNEQ	HLA-B*57:01	QASQEVKNW	McPAS_TBA	Immunogenic peptide
CASSLAGGYT	HLA-B*57:01	KAFSPEVIPMF	McPAS_IEDB_TBA_VDJdb	Immunogenic peptide
CASSLAPGGIA	HLA-B*57:03	TQGYFPDWQNY	McPAS_TBA	Immunogenic peptide
CASSLAQGWKTQY	HLA-B*57:03	ISPRTLNAW	McPAS	Immunogenic peptide
CASSLDSGFLEQY	HLA-B*15:01	GLNKIVRMY	McPAS_TBA_VDJdb	Immunogenic peptide
CASSLGGGQNGYT	HLA-B*57:01	KAFSPEVIPMF	McPAS_IEDB_TBA_VDJdb	Immunogenic peptide
CASSLGGGYT	HLA-B*57:01	KAFSPEVIPMF	McPAS_IEDB_TBA_VDJdb	Immunogenic peptide
CASSLGLDETQY	HLA-B*57:03	ISPRTLNAW	McPAS	Immunogenic peptide
CASSLGSAKNIQY	HLA-B*08:01	EIYKRWII	McPAS_TBA_VDJdb	Immunogenic peptide
CASSLGYGYT	HLA-B*57:01	QASQEVKNW	McPAS_TBA_VDJdb	Immunogenic peptide
CASSLLDGTRDQQY	HLA-B*08:01	EIYKRWII	McPAS_TBA_VDJdb	Immunogenic peptide
CASSLLPDPRSSGGYT	HLA-B*08:01	EIYKRWII	McPAS_TBA_VDJdb	Immunogenic peptide
CASSLQGAPEQ	HLA-B*15:01	GLNKIVRMY	McPAS_TBA	Immunogenic peptide
CASSLQQTLGA	HLA-B*08:01	EIYKRWII	McPAS_TBA	Immunogenic peptide
CASSLRGTGEL	HLA-B*08:01	FLKEKGGL	McPAS_TBA	Immunogenic peptide
CASSLSGSGWQETQY	HLA-B*08:01	EIYKRWII	McPAS_TBA_VDJdb	Immunogenic peptide
CASSLTYGYT	HLA-B*57:01	KAFSPEVIPMF	McPAS_IEDB_TBA_VDJdb	Immunogenic peptide
CASSLVGQGARQPQH	HLA-B*08:01	EIYKRWII	McPAS_TBA_VDJdb	Immunogenic peptide
CASSLYGEYEQY	HLA-B*27:01	KRWIIMGLNK	McPAS_TBA	Immunogenic peptide
CASSPGGGEL	HLA-B*08:01	EIYKRWII	McPAS_TBA	Immunogenic peptide
CASSPGQTNYGYT	HLA-B*57:01	KAFSPEVIPMF	McPAS_IEDB_TBA_VDJdb	Immunogenic peptide
CASSPPSSYNEQ	HLA-B*15:01	GLNKIVRMY	McPAS_TBA	Immunogenic peptide
CASSPQQTLGA	HLA-B*08:01	EIYKRWII	McPAS_TBA	Immunogenic peptide
CASSPRDSQETQY	HLA-B*57:01	KAFSPEVIPMF	McPAS_IEDB_TBA_VDJdb	Immunogenic peptide
CASSPSFPPDTQY	HLA-B*08:01	EIYKRWII	McPAS_TBA	Immunogenic peptide
CASSQAAGGRA	HLA-B*57:03	TQGYFPDWQNY	McPAS_TBA	Immunogenic peptide
CASSQAAGGRAI	HLA-B*57:03	TQGYFPDWQNY	McPAS_TBA	Immunogenic peptide
CASSQAEGGQNH	HLA-B*57:03	TQGYFPDWQNY	McPAS_TBA	Immunogenic peptide
CASSQDLRGARGYT	HLA-B*08:01	EIYKRWII	McPAS_TBA	Immunogenic peptide
CASSQDRIHTEA	HLA-B*57:03	ISPRTLNAW	McPAS	Immunogenic peptide
CASSQDSSGRVTGEL	HLA-B*08:01	EIYKRWII	McPAS_TBA	Immunogenic peptide
CASSQEMNRVVGNEQ	HLA-B*08:01	FLKEKGGL	McPAS_TBA	Immunogenic peptide
CASSQGLAGDEQ	HLA-B*08:01	EIYKRWII	McPAS_TBA	Immunogenic peptide
CASSQGLAGDEQY	HLA-B*08:01	EIYKRWII	McPAS_TBA	Immunogenic peptide
CASSQGTGSTDTQY	HLA-B*08:01	EIYKRWII	McPAS_TBA	Immunogenic peptide
CASSQGTTDTQY	HLA-B*27:01	KRWIIMGLNK	McPAS_TBA	Immunogenic peptide
CASSQWTGEL	HLA-B*27:01	KRWIIMGLNK	McPAS_TBA	Immunogenic peptide
CASSSGTSGSAGYNEQ	HLA-B*57:03	ISPRTLNAW	McPAS	Immunogenic peptide
CASSSLVNTGEL	HLA-B*57:01	KAFSPEVIPMF	McPAS_TBA	Immunogenic peptide
CASSSMGGGTDTQY	HLA-B*57:01	KAFSPEVIPMF	McPAS_IEDB_TBA_VDJdb	Immunogenic peptide
CASSSPGGVTEA	HLA-B*08:01	EIYKRWII	McPAS_TBA	Immunogenic peptide
CASSSRTGGYGYT	HLA-B*57:01	KAFSPEVIPMF	McPAS_IEDB_TBA_VDJdb	Immunogenic peptide
CASSSSTGQQPQH	HLA-B*57:03	ISPRTLNAW	McPAS	Immunogenic peptide
CASSTLGDSREKL	HLA-B*08:01	EIYKRWII	McPAS_TBA	Immunogenic peptide
CASSTLRDSREKL	HLA-B*08:01	EIYKRWII	McPAS_TBA	Immunogenic peptide
CASSTLTGEDSGPQH	HLA-B*08:01	EIYKRWII	McPAS_TBA	Immunogenic peptide
CASSTNNEQ	HLA-B*57:03	ISPRTLNAW	McPAS	Immunogenic peptide
CASSVEGTIHTDTQY	HLA-B*08:01	EIYKRWII	McPAS_TBA	Immunogenic peptide
CASSVEGTILTDTQY	HLA-B*08:01	EIYKRWII	McPAS_TBA	Immunogenic peptide
CASSVVGDSRETQY	HLA-B*57:01	KAFSPEVIPMF	McPAS_TBA	Immunogenic peptide
CASSYSVVEAAAEA	HLA-B*08:01	EIYKRWII	McPAS_TBA	Immunogenic peptide
CASTGGRGSPLH	HLA-B*08:01	EIYKRWII	McPAS_TBA_VDJdb	Immunogenic peptide
CASTPPG	HLA-B*27:01	KRWIIMGLNK	McPAS_TBA	Immunogenic peptide
CASTRPGQGTYNEFQ	HLA-B*08:01	FLKEKGGL	McPAS_TBA	Immunogenic peptide
CATPGEVLSPNYGYT	HLA-B*57:01	KAFSPEVIPMF	McPAS_IEDB_TBA_VDJdb	Immunogenic peptide
CATSDRMDNEQ	HLA-B*57:01	KAFSPEVIPMF	McPAS_TBA	Immunogenic peptide
CGSSVVGDSRETQY	HLA-B*08:01	EIYKRWII	McPAS_TBA	Immunogenic peptide
CSAIVGSAYEQY	HLA-B*08:01	EIYKRWII	McPAS_TBA	Immunogenic peptide
CSALVEGDEQ	HLA-B*08:01	EIYKRWII	McPAS_TBA	Immunogenic peptide
CSARDPLPEASGGAGTDTQY	HLA-B*27:01	KRWIIMGLNK	McPAS_TBA	Immunogenic peptide
CSARDRADRVLIPDTQY	HLA-B*08:01	EIYKRWII	McPAS_TBA	Immunogenic peptide
CSAREKGSQETQY	HLA-B*57:01	KAFSPEVIPMF	McPAS_IEDB_TBA_VDJdb	Immunogenic peptide
CSARGWVSNNRETQY	HLA-B*57:01	KAFSPEVIPMF	McPAS_IEDB_TBA_VDJdb	Immunogenic peptide
CSASLGGRISGANVLT	HLA-B*08:01	EIYKRWII	McPAS_TBA	Immunogenic peptide
CSASPVGGAYEQY	HLA-B*08:01	EIYKRWII	McPAS_TBA	Immunogenic peptide
CSVDGPTGGYT	HLA-B*08:01	EIYKRWII	McPAS_TBA	Immunogenic peptide
CSVGDQGGSEQY	HLA-B*08:01	FLKEKGGL	McPAS_TBA_VDJdb	Immunogenic peptide
CTSRLDPGFLEQY	HLA-B*15:01	GLNKIVRMY	McPAS_TBA_VDJdb	Immunogenic peptide
CAISEYGASPLH	HLA-B*27:05	KRWIILGLNK	McPAS_TBA	Immunogenic peptide
CARREANYGYT	HLA-B*27:05	KRWIILGLNK	McPAS_TBA	Immunogenic peptide
CASAMTGEGYGYT	HLA-B*27:05	KRWIILGLNK	McPAS_TBA	Immunogenic peptide
CASMGGANTEA	HLA-B*27:05	KRWIILGLNK	McPAS_TBA	Immunogenic peptide
CASRLLGGGQETQY	HLA-B*27:05	KRWIILGLNK	McPAS_TBA_VDJdb	Immunogenic peptide
CASSEGAYEQY	HLA-B*27:05	KRWIILGLNK	McPAS_TBA	Immunogenic peptide
CASSFGQGAIEQY	HLA-B*27:05	KRWIILGLNK	McPAS_TBA	Immunogenic peptide
CASSGGAHTEA	HLA-B*27:05	KRWIILGLNK	McPAS_TBA	Immunogenic peptide
CASSGQLLEA	HLA-B*27:05	KRWIILGLNK	McPAS_TBA	Immunogenic peptide
CASSLDHLAGVNNEQ	HLA-B*27:05	KRWIILGLNK	McPAS_TBA	Immunogenic peptide
CASSLDSYEQY	HLA-B*27:05	KRWIILGLNK	McPAS_TBA_VDJdb	Immunogenic peptide
CASSLEGSRNTEA	HLA-B*27:05	KRWIILGLNK	McPAS_TBA	Immunogenic peptide
CASSLGGLDIEQY	HLA-B*27:05	KRWIILGLNK	McPAS_TBA	Immunogenic peptide
CASSLGGTNHGYT	HLA-B*27:05	KRWIILGLNK	McPAS_TBA	Immunogenic peptide
CASSLGIPGTAQWVYGYT	HLA-B*27:05	KRWIILGLNK	McPAS_TBA_VDJdb	Immunogenic peptide
CASSLRGGNTDTQY	HLA-B*27:05	KRWIILGLNK	McPAS_TBA_VDJdb	Immunogenic peptide
CASSLSSDEHGYT	HLA-B*27:05	KRWIILGLNK	McPAS_TBA	Immunogenic peptide
CASSLVGSYNEQ	HLA-B*27:05	KRWIILGLNK	McPAS_TBA	Immunogenic peptide
CASSLVLAIEQY	HLA-B*27:05	KRWIILGLNK	McPAS_TBA	Immunogenic peptide
CASSMGQNSNEQY	HLA-B*27:05	KRWIILGLNK	McPAS_TBA	Immunogenic peptide
CASSPGQFGNTIY	HLA-B*27:05	KRWIILGLNK	McPAS_TBA_VDJdb	Immunogenic peptide
CASSPGQLGNTIY	HLA-B*27:05	KRWIIMGLNK	McPAS_TBA	Immunogenic peptide
CASSPGQLGNTIY	HLA-B*27:05	KRWIILGLNK	McPAS_TBA_VDJdb	Immunogenic peptide
CASSPGTGKNIQY	HLA-B*27:05	KRWIILGLNK	McPAS_TBA	Immunogenic peptide
CASSPGVFGVTQY	HLA-B*27:05	KRWIILGLNK	McPAS_TBA_VDJdb	Immunogenic peptide
CASSPGVLGNTIY	HLA-B*27:05	KRWIILGLNK	McPAS_TBA_VDJdb	Immunogenic peptide
CASSPTTYGYT	HLA-B*27:05	KRWIILGLNK	McPAS_TBA_VDJdb	Immunogenic peptide
CASSQAQGLSNSPLH	HLA-B*27:05	KRWIILGLNK	McPAS_TBA	Immunogenic peptide
CASSQDGVYSNQPQH	HLA-B*27:05	KRWIILGLNK	McPAS_TBA	Immunogenic peptide
CASSQEGVNTEA	HLA-B*27:05	KRWIILGLNK	McPAS_TBA	Immunogenic peptide
CASSQGLSSNEQ	HLA-B*27:05	KRWIILGLNK	McPAS_TBA	Immunogenic peptide
CASSQGQLGNTIY	HLA-B*27:05	KRWIIMGLNK	McPAS_TBA	Immunogenic peptide
CASSQGQLGNTIY	HLA-B*27:05	KRWIILGLNK	McPAS_TBA_VDJdb	Immunogenic peptide
CASSQGQYGNEQ	HLA-B*27:05	KRWIILGLNK	McPAS_TBA	Immunogenic peptide
CASSQPPDRGYGYT	HLA-B*27:05	KRWIILGLNK	McPAS_TBA	Immunogenic peptide
CASSRTQGPNTDTQY	HLA-B*27:05	KRWIILGLNK	McPAS_TBA	Immunogenic peptide
CASSSKTGEL	HLA-B*27:05	KRWIILGLNK	McPAS_TBA	Immunogenic peptide
CASSSRTGEL	HLA-B*27:05	KRWIILGLNK	McPAS_TBA	Immunogenic peptide
CASSSTRGTEA	HLA-B*27:05	KRWIILGLNK	McPAS_TBA	Immunogenic peptide
CASSTTSGRYEQY	HLA-B*27:05	KRWIILGLNK	McPAS_TBA	Immunogenic peptide
CASSVLGTSGGAEQ	HLA-B*27:05	KRWIILGLNK	McPAS_TBA	Immunogenic peptide
CATSETGEL	HLA-B*27:05	KRWIILGLNK	McPAS_TBA	Immunogenic peptide
CATSGVTGEL	HLA-B*27:05	KRWIILGLNK	McPAS_TBA	Immunogenic peptide
CAWSLTGMNQPQH	HLA-B*27:05	KRWIILGLNK	McPAS_TBA_VDJdb	Immunogenic peptide
CSARDLGLAGDTDTQY	HLA-B*27:05	KRWIILGLNK	McPAS_TBA_VDJdb	Immunogenic peptide
CSARDWASGLSSYEQY	HLA-B*27:05	KRWIILGLNK	McPAS_TBA_VDJdb	Immunogenic peptide
CSARREANYGYT	HLA-B*27:05	KRWIILGLNK	McPAS_TBA	Immunogenic peptide
CASSFGQGAIEQY	HLA-B*27:01	KRWIILGLNK	McPAS_TBA_VDJdb	Immunogenic peptide
CASSGLAGLGQ	HLA-B*27:01	KRWIILGLNK	McPAS_TBA	Immunogenic peptide
CASSLEGGAALWDTQY	HLA-B*27:01	KRWIILGLNK	McPAS_TBA_VDJdb	Immunogenic peptide
CASSLVLATEQY	HLA-B*27:01	KRWIILGLNK	McPAS_TBA	Immunogenic peptide
CASSMIQGADTQY	HLA-B*42:01	TPQDLNTML	McPAS_TBA_VDJdb	Immunogenic peptide
CASSQDQTLYFMNTEA	HLA-B*27:01	KRWIILGLNK	McPAS_TBA	Immunogenic peptide
CASSQDRMDRAGEQY	HLA-B*27:01	KRWIILGLNK	McPAS_TBA_VDJdb	Immunogenic peptide
CASSQGQLGNTLY	HLA-B*27:01	KRWIILGLNK	McPAS_TBA	Immunogenic peptide
CASSSGDETQY	HLA-B*57:01	KAFSPEVIPMF	McPAS_TBA	Immunogenic peptide
CATSEAANTGEL	HLA-B*57:01	KAFSPEVIPMF	McPAS_TBA	Immunogenic peptide
CATSRDGAGSNEKL	HLA-B*27:01	KRWIILGLNK	McPAS_TBA	Immunogenic peptide
CASGGGTVYEQY	HLA-B*27:05	KRWIILGLNK	McPAS_TBA	Immunogenic peptide
CASRPGLASNEQ	HLA-B*27:05	KRWIILGLNK	McPAS_TBA	Immunogenic peptide
CASRPGQGATEA	HLA-B*27:05	KRWIILGLNK	McPAS_TBA	Immunogenic peptide
CASSAGPGQYGNTIY	HLA-B*27:05	KRWIILGLNK	McPAS_TBA	Immunogenic peptide
CASSARTGEL	HLA-B*27:05	KRWIILGLNK	McPAS_TBA	Immunogenic peptide
CASSEADFEAF	HLA-B*27:05	KRWIILGLNK	McPAS_TBA	Immunogenic peptide
CASSEDRDTEAF	HLA-B*27:05	KRWIILGLNK	McPAS_TBA	Immunogenic peptide
CASSGGRRA	HLA-B*27:05	KRWIILGLNK	McPAS_TBA	Immunogenic peptide
CASSGGRRAF	HLA-B*27:05	KRWIILGLNK	McPAS_TBA	Immunogenic peptide
CASSGGVFYGYT	HLA-B*27:05	KRWIILGLNK	McPAS_TBA	Immunogenic peptide
CASSGSNLEA	HLA-B*27:05	KRWIILGLNK	McPAS_TBA	Immunogenic peptide
CASSLAGGDSYEQY	HLA-B*27:05	KRWIILGLNK	McPAS_TBA	Immunogenic peptide
CASSLDRLEQ	HLA-B*27:05	KRWIILGLNK	McPAS_TBA	Immunogenic peptide
CASSLEGGANL	HLA-B*27:05	KRWIILGLNK	McPAS_TBA	Immunogenic peptide
CASSLEGRYSNQPQH	HLA-B*27:05	KRWIILGLNK	McPAS_TBA	Immunogenic peptide
CASSLGTGKVEGYT	HLA-B*27:05	KRWIILGLNK	McPAS_TBA	Immunogenic peptide
CASSLLAGGTDTQY	HLA-B*27:05	KRWIILGLNK	McPAS_TBA	Immunogenic peptide
CASSLSGRWSTDTQY	HLA-B*27:05	KRWIILGLNK	McPAS_TBA	Immunogenic peptide
CASSLTNLGEQY	HLA-B*27:05	KRWIILGLNK	McPAS_TBA	Immunogenic peptide
CASSPEGPRAIEQ	HLA-B*27:05	KRWIILGLNK	McPAS_TBA	Immunogenic peptide
CASSPGQFSHEQY	HLA-B*27:05	KRWIILGLNK	McPAS_TBA	Immunogenic peptide
CASSPGTNAYEQY	HLA-B*27:05	KRWIILGLNK	McPAS	Immunogenic peptide
CASSPGTSTYEQY	HLA-B*27:05	KRWIILGLNK	McPAS_TBA	Immunogenic peptide
CASSPLGNSGNTIY	HLA-B*27:05	KRWIILGLNK	McPAS_TBA	Immunogenic peptide
CASSPLGVRAYEQY	HLA-B*27:05	KRWIILGLNK	McPAS_TBA	Immunogenic peptide
CASSPRTGEL	HLA-B*27:05	KRWIILGLNK	McPAS_TBA	Immunogenic peptide
CASSQARASHLI	HLA-B*27:05	KRWIILGLNK	McPAS_TBA	Immunogenic peptide
CASSQGSGSGNTIY	HLA-B*27:05	KRWIILGLNK	McPAS_TBA	Immunogenic peptide
CASSQRTGEL	HLA-B*27:05	KRWIILGLNK	McPAS_TBA	Immunogenic peptide
CASSQVLRGVYGYT	HLA-B*27:05	KRWIILGLNK	McPAS_TBA	Immunogenic peptide
CASSRATGEL	HLA-B*27:05	KRWIILGLNK	McPAS_TBA	Immunogenic peptide
CASSRDSNEQ	HLA-B*27:05	KRWIILGLNK	McPAS_TBA	Immunogenic peptide
CASSRTTGEL	HLA-B*27:05	KRWIILGLNK	McPAS_TBA	Immunogenic peptide
CASSSPDRTYGYT	HLA-B*27:05	KRWIILGLNK	McPAS_TBA	Immunogenic peptide
CASSSSGGAGDTQY	HLA-B*27:05	KRWIILGLNK	McPAS_TBA	Immunogenic peptide
CASSVVRGNPNEQ	HLA-B*27:05	KRWIILGLNK	McPAS_TBA	Immunogenic peptide
CASTNRGSEQY	HLA-B*27:05	KRWIILGLNK	McPAS_TBA	Immunogenic peptide
CATLGGFPDGYT	HLA-B*27:05	KRWIILGLNK	McPAS_TBA	Immunogenic peptide
CATSETGTTLEQY	HLA-B*27:05	KRWIILGLNK	McPAS_TBA	Immunogenic peptide
CATSRELTGGPSYEQY	HLA-B*27:05	KRWIILGLNK	McPAS_TBA	Immunogenic peptide
CSAPTTEVAGSTDTQY	HLA-B*27:05	KRWIILGLNK	McPAS_TBA	Immunogenic peptide
CSARDGGEQY	HLA-B*27:05	KRWIILGLNK	McPAS_TBA	Immunogenic peptide
CSARDRGTREVADNYGYT	HLA-B*27:05	KRWIILGLNK	McPAS_TBA	Immunogenic peptide
CSARDRTRANYGYT	HLA-B*27:05	KRWIILGLNK	McPAS_TBA	Immunogenic peptide
CSAREGLAGVLYEQY	HLA-B*27:05	KRWIILGLNK	McPAS_TBA	Immunogenic peptide
CSAREGVEGYT	HLA-B*27:05	KRWIILGLNK	McPAS_TBA	Immunogenic peptide
CAISEFGLAGSDEQ	HLA-B*08:01	ELRRKMMYM	McPAS	Immunogenic peptide
CAISTGDSNQPQH	HLA-B*35:01	EPLPQGQLTAY	McPAS_IEDB_TBA_VDJdb	Immunogenic peptide
CASNRESAYT	HLA-B*35:01	HPVGEADYFEY	McPAS_VDJdb	Immunogenic peptide
CASREKGYDEQ	HLA-B*35:01	HPVGEADYFEY	McPAS	Immunogenic peptide
CASSFNGPNTEA	HLA-B*08:01	ELRRKMMYM	McPAS	Immunogenic peptide
CASSGTGTEA	HLA-B*35:01	IPSINVHHY	McPAS	Immunogenic peptide
CASSGVEGITVNTEA	HLA-B*08:01	QIKVRVDMV	McPAS	Immunogenic peptide
CASSHTGAEA	HLA-B*35:01	IPSINVHHY	McPAS	Immunogenic peptide
CASSKTGTEA	HLA-B*35:01	IPSINVHHY	McPAS	Immunogenic peptide
CASSLALDEQ	HLA-B*35:01	IPSINVHHY	McPAS	Immunogenic peptide
CASSLDLGSTEA	HLA-B*35:01	IPSINVHHY	McPAS	Immunogenic peptide
CASSLFDGTGSTEA	HLA-B*08:01	ELRRKMMYM	McPAS	Immunogenic peptide
CASSLGVDFNYGYT	HLA-A*02:01	YSEHPTFTSQY	McPAS	Immunogenic peptide
CASSLKPGLSIDTQY	HLA-B*08:01	QIKVRVDMV	McPAS_TBA_VDJdb	Immunogenic peptide
CASSLKTGELV	HLA-B*35:01	HPVGEADYFEY	McPAS	Immunogenic peptide
CASSLSGGLWSYEQY	HLA-A*02:01	YSEHPTFTSQY	McPAS	Immunogenic peptide
CASSLTGSEA	HLA-B*35:01	IPSINVHHY	McPAS	Immunogenic peptide
CASSLTGTEA	HLA-B*35:01	IPSINVHHY	McPAS	Immunogenic peptide
CASSLTQGANTEA	HLA-B*08:01	ELRRKMMYM	McPAS	Immunogenic peptide
CASSLYEEVLLSYNEQ	HLA-B*08:01	ELRRKMMYM	McPAS	Immunogenic peptide
CASSPALDAQY	HLA-B*35:01	IPSINVHHY	McPAS_VDJdb	Immunogenic peptide
CASSPDLGSTEA	HLA-B*35:01	IPSINVHHY	McPAS	Immunogenic peptide
CASSPGTEQ	HLA-B*35:01	IPSINVHHY	McPAS	Immunogenic peptide
CASSPREMLYNEQ	HLA-B*35:01	HPVGEADYFEY	McPAS	Immunogenic peptide
CASSPTGGEL	HLA-B*35:01	IPSINVHHY	McPAS	Immunogenic peptide
CASSPTPGQRNGYT	HLA-B*08:01	QIKVRVDMV	McPAS_TBA_VDJdb	Immunogenic peptide
CASSPTTAYEQY	HLA-B*35:01	IPSINVHHY	McPAS_VDJdb	Immunogenic peptide
CASSQAGVEQ	HLA-B*35:01	HPVGEADYFEY	McPAS	Immunogenic peptide
CASSQAGVEQY	HLA-B*35:01	HPVGEADYFEY	McPAS_VDJdb	Immunogenic peptide
CASSQGGSYNEQ	HLA-B*08:01	ELRRKMMYM	McPAS	Immunogenic peptide
CASSRAGAYNEQ	HLA-B*08:01	QIKVRVDMV	McPAS	Immunogenic peptide
CASSRLAGADTQY	HLA-B*08:01	QIKVRVDMV	McPAS_TBA_VDJdb	Immunogenic peptide
CASSSGGVYEQY	HLA-B*35:01	IPSINVHHY	McPAS_VDJdb	Immunogenic peptide
CASSSPLLSSDTQY	HLA-A*02:01	YSEHPTFTSQY	McPAS	Immunogenic peptide
CASSTGDHSNQPQH	HLA-A*02:01	YSEHPTFTSQY	McPAS	Immunogenic peptide
CASSTGDHSNQPQH	HLA-B*35:01	EPLPQGQLTAY	McPAS_VDJdb	Immunogenic peptide
CASSYSTAGEL	HLA-B*35:01	IPSINVHHY	McPAS	Immunogenic peptide
CASSYSTGQLQH	HLA-B*35:01	IPSINVHHY	McPAS_VDJdb	Immunogenic peptide
CASSYTGSEA	HLA-B*35:01	IPSINVHHY	McPAS	Immunogenic peptide
CATGTGDSNQPQH	HLA-B*35:01	EPLPQGQLTAY	McPAS_IEDB_TBA_VDJdb	Immunogenic peptide
CATSGPSASYEQY	HLA-A*02:01	YSEHPTFTSQY	McPAS	Immunogenic peptide
CATSGRYGEQ	HLA-B*35:01	HPVGEADYFEY	McPAS	Immunogenic peptide
CATSSPGLASDEQ	HLA-A*02:01	YSEHPTFTSQY	McPAS	Immunogenic peptide
CATSVPSGRSYNEQ	HLA-B*08:01	QIKVRVDMV	McPAS	Immunogenic peptide
CSVMRGEHDEQY	HLA-B*35:01	IPSINVHHY	McPAS_VDJdb	Immunogenic peptide
CSVMRTDFDQY	HLA-B*35:01	IPSINVHHY	McPAS_VDJdb	Immunogenic peptide
CSVMRTDFQY	HLA-B*35:01	IPSINVHHY	McPAS_VDJdb	Immunogenic peptide
CSVTGTSYEQY	HLA-A*02:01	YSEHPTFTSQY	McPAS	Immunogenic peptide
CSVVGRYYEQY	HLA-A*02:01	YSEHPTFTSQY	McPAS	Immunogenic peptide
CAGTGIRSAGEL	HLA-A*24:02	QYDPVAALF	McPAS_IEDB	Immunogenic peptide
CAIKGTVSTQETQY	HLA-A*24:02	QYDPVAALF	McPAS_IEDB_VDJdb	Immunogenic peptide
CAISDPGHRFGEA	HLA-A*24:02	QYDPVAALF	McPAS_IEDB	Immunogenic peptide
CASDRGGNTGEL	HLA-A*24:02	QYDPVAALF	McPAS_IEDB	Immunogenic peptide
CASINRGTDPYEQY	HLA-A*24:02	QYDPVAALF	McPAS_IEDB_VDJdb	Immunogenic peptide
CASKPRDSGDTQY	HLA-A*24:02	QYDPVAALF	McPAS_IEDB_VDJdb	Immunogenic peptide
CASRGQVSSQETQY	HLA-A*24:02	QYDPVAALF	McPAS_IEDB_VDJdb	Immunogenic peptide
CASSDPGDSLNGYT	HLA-A*24:02	QYDPVAALF	McPAS_IEDB	Immunogenic peptide
CASSFTLSPETQY	HLA-A*24:02	QYDPVAALF	McPAS_IEDB_VDJdb	Immunogenic peptide
CASSLDTDTQY	HLA-A*24:02	QYDPVAALF	McPAS_IEDB_VDJdb	Immunogenic peptide
CASSLGAGGPSDTQY	HLA-A*24:02	QYDPVAALF	McPAS_IEDB_VDJdb	Immunogenic peptide
CASSLGGLAPSTDTQY	HLA-A*24:02	QYDPVAALF	McPAS_IEDB_VDJdb	Immunogenic peptide
CASSLNSVGTEA	HLA-A*24:02	QYDPVAALF	McPAS_IEDB	Immunogenic peptide
CASSLSSTRTDTQY	HLA-A*24:02	QYDPVAALF	McPAS_IEDB_VDJdb	Immunogenic peptide
CASSPDRGRGYT	HLA-A*24:02	QYDPVAALF	McPAS_IEDB_VDJdb	Immunogenic peptide
CASSQGQGAQNQPQH	HLA-A*24:02	QYDPVAALF	McPAS_IEDB_VDJdb	Immunogenic peptide
CASSQVSTGETQY	HLA-A*24:02	QYDPVAALF	McPAS_IEDB_VDJdb	Immunogenic peptide
CASSSDIGGGSYGYT	HLA-A*24:02	QYDPVAALF	McPAS_IEDB	Immunogenic peptide
CASSSIQGAAGEL	HLA-A*24:02	QYDPVAALF	McPAS_IEDB	Immunogenic peptide
CASSSNQGATQY	HLA-A*24:02	QYDPVAALF	McPAS_IEDB_VDJdb	Immunogenic peptide
CASSSTGGGGAEA	HLA-A*24:02	QYDPVAALF	McPAS_IEDB	Immunogenic peptide
CASSSTGGGGTEA	HLA-A*24:02	QYDPVAALF	McPAS_IEDB	Immunogenic peptide
CASTPRDRSNYEQY	HLA-A*24:02	QYDPVAALF	McPAS_IEDB_VDJdb	Immunogenic peptide
CSARFSGQGTEA	HLA-A*24:02	QYDPVAALF	McPAS_IEDB	Immunogenic peptide
CSARNPGLYEQY	HLA-A*24:02	QYDPVAALF	McPAS_IEDB_VDJdb	Immunogenic peptide
CSAMREVNTEA	HLA-A*02:01	GLCTLVAML	McPAS	Immunogenic peptide
CSARGTGNGYT	HLA-A*02:01	GLCTLVAML	McPAS_IEDB	Immunogenic peptide
CSARSETGNTIY	HLA-A*02:01	GLCTLVAML	McPAS_IEDB_VDJdb_10X	Immunogenic peptide
CSVGAGGTNEKL	HLA-A*02:01	GLCTLVAML	McPAS_IEDB	Immunogenic peptide
CSVGSGGTNEKL	HLA-A*02:01	GLCTLVAML	McPAS_IEDB	Immunogenic peptide
CSVQGGTNEKL	HLA-A*02:01	GLCTLVAML	McPAS	Immunogenic peptide
CAGGTGETSPGEL	HLA-A*02:01	GLCTLVAML	McPAS_IEDB	Immunogenic peptide
CAGRPRLAGGNNQE	HLA-B*08:01	RAKFKQLL	McPAS	Immunogenic peptide
CASGTGESGYT	HLA-B*08:01	RAKFKQLL	McPAS_IEDB_VDJdb	Immunogenic peptide
CASGWGSQPQH	HLA-A*11:01	AVFDRKSDAK	McPAS_IEDB_VDJdb	Immunogenic peptide
CASKMRGDVYEQY	HLA-B*08:01	RAKFKQLL	McPAS_IEDB_VDJdb	Immunogenic peptide
CASLFTGTSPTDTQY	HLA-B*08:01	RAKFKQLL	McPAS_IEDB_VDJdb	Immunogenic peptide
CASLRGLGTDTQY	HLA-B*08:01	RAKFKQLL	McPAS_IEDB_VDJdb	Immunogenic peptide
CASMGGASYNEQ	HLA-A*02:01	YVLDHLIVV	McPAS	Immunogenic peptide
CASNILGQADTQY	HLA-B*08:01	RAKFKQLL	McPAS	Immunogenic peptide
CASRATMGGGTEA	HLA-A*02:01	YVLDHLIVV	McPAS	Immunogenic peptide
CASRDPGLAGEGHGEL	HLA-B*08:01	RAKFKQLL	McPAS	Immunogenic peptide
CASREGDINTGEL	HLA-A*11:01	IVTDFSVIK	McPAS	Immunogenic peptide
CASRGLLGGITEA	HLA-A*02:01	YVLDHLIVV	McPAS	Immunogenic peptide
CASRTTSGGASEQ	HLA-A*02:01	YVLDHLIVV	McPAS	Immunogenic peptide
CASRYTGQETYEQY	HLA-B*08:01	RAKFKQLL	McPAS_IEDB_VDJdb	Immunogenic peptide
CASSAASGTDTQY	HLA-B*08:01	FLRGRAYGL	McPAS_IEDB_VDJdb	Immunogenic peptide
CASSAGRVSPGEL	HLA-A*02:01	GLCTLVAML	McPAS_IEDB	Immunogenic peptide
CASSATGLSVTDTQY	HLA-B*08:01	RAKFKQLL	McPAS_IEDB_VDJdb	Immunogenic peptide
CASSAWDINTGEL	HLA-A*11:01	IVTDFSVIK	McPAS	Immunogenic peptide
CASSDLANEQ	HLA-A*02:01	YVLDHLIVV	McPAS	Immunogenic peptide
CASSDLNSPLH	HLA-B*08:01	RAKFKQLL	McPAS_IEDB_VDJdb	Immunogenic peptide
CASSEASGGFYNEQ	HLA-A*11:01	IVTDFSVIK	McPAS	Immunogenic peptide
CASSEGRLSGEL	HLA-A*02:01	GLCTLVAML	McPAS	Immunogenic peptide
CASSELGRFIIQPQH	HLA-A*02:01	GLCTLVAML	McPAS_VDJdb	Immunogenic peptide
CASSFMQGDSPLH	HLA-B*08:01	RAKFKQLL	McPAS_IEDB_VDJdb	Immunogenic peptide
CASSFQGSNEKL	HLA-B*08:01	RAKFKQLL	McPAS	Immunogenic peptide
CASSFRGEGSYEQY	HLA-B*08:01	RAKFKQLL	McPAS_IEDB_VDJdb	Immunogenic peptide
CASSFRLGQGHYGYT	HLA-A*02:01	YVLDHLIVV	McPAS_IEDB_VDJdb	Immunogenic peptide
CASSFSGQGAANKEL	HLA-B*08:01	RAKFKQLL	McPAS	Immunogenic peptide
CASSFSGSLTTEA	HLA-B*08:01	RAKFKQLL	McPAS	Immunogenic peptide
CASSFSLGAAGEL	HLA-A*02:01	YVLDHLIVV	McPAS	Immunogenic peptide
CASSFVGEYEQY	HLA-B*08:01	RAKFKQLL	McPAS	Immunogenic peptide
CASSGLNSPLH	HLA-B*08:01	RAKFKQLL	McPAS_IEDB_VDJdb	Immunogenic peptide
CASSGSAGGVWDNEQ	HLA-B*08:01	RAKFKQLL	McPAS	Immunogenic peptide
CASSGSSGGYYNEQE	HLA-A*11:01	IVTDFSVIK	McPAS	Immunogenic peptide
CASSIDGTAYEQY	HLA-A*02:01	GLCTLVAML	McPAS_IEDB_VDJdb	Immunogenic peptide
CASSIVGAHTEA	HLA-A*11:01	IVTDFSVIK	McPAS	Immunogenic peptide
CASSKWTGGNQW	HLA-A*02:01	GLCTLVAML	McPAS	Immunogenic peptide
CASSLAGGSYNSPLH	HLA-A*11:01	IVTDFSVIK	McPAS_IEDB_VDJdb	Immunogenic peptide
CASSLAPSYEQY	HLA-B*08:01	RAKFKQLL	McPAS_IEDB_VDJdb	Immunogenic peptide
CASSLAVEGVSRMNTEA	HLA-A*02:01	YVLDHLIVV	McPAS	Immunogenic peptide
CASSLAVLSSYNEQ	HLA-B*08:01	RAKFKQLL	McPAS	Immunogenic peptide
CASSLDLSSGANVLT	HLA-A*02:01	YVLDHLIVV	McPAS_IEDB_VDJdb	Immunogenic peptide
CASSLDSQSSGNTIY	HLA-B*08:01	RAKFKQLL	McPAS_IEDB_VDJdb	Immunogenic peptide
CASSLEGSYEQY	HLA-B*08:01	RAKFKQLL	McPAS_IEDB_VDJdb	Immunogenic peptide
CASSLGLENEQ	HLA-A*02:01	GLCTLVAML	McPAS_IEDB	Immunogenic peptide
CASSLGLGVNNEQ	HLA-B*08:01	RAKFKQLL	McPAS	Immunogenic peptide
CASSLGRDGVY	HLA-B*08:01	RAKFKQLL	McPAS_IEDB_VDJdb	Immunogenic peptide
CASSLGSGNYGYT	HLA-A*11:01	IVTDFSVIK	McPAS_IEDB_VDJdb	Immunogenic peptide
CASSLGTGHNEQ	HLA-B*08:01	RAKFKQLL	McPAS	Immunogenic peptide
CASSLHFEVEKL	HLA-A*02:01	YVLDHLIVV	McPAS	Immunogenic peptide
CASSLIASGGYNEQ	HLA-B*08:01	RAKFKQLL	McPAS	Immunogenic peptide
CASSLLGEKAYEQY	HLA-B*08:01	RAKFKQLL	McPAS_IEDB_VDJdb	Immunogenic peptide
CASSLLGHPSGEL	HLA-B*08:01	RAKFKQLL	McPAS	Immunogenic peptide
CASSLLGQDNSPLH	HLA-B*08:01	RAKFKQLL	McPAS_IEDB_VDJdb	Immunogenic peptide
CASSLLGQYNSPLH	HLA-B*08:01	RAKFKQLL	McPAS_IEDB_VDJdb	Immunogenic peptide
CASSLLGTENTEA	HLA-B*08:01	RAKFKQLL	McPAS	Immunogenic peptide
CASSLLIGANNEQY	HLA-B*08:01	RAKFKQLL	McPAS	Immunogenic peptide
CASSLMASGGYNEQ	HLA-B*08:01	RAKFKQLL	McPAS	Immunogenic peptide
CASSLMGNSPLH	HLA-B*08:01	RAKFKQLL	McPAS_IEDB_VDJdb	Immunogenic peptide
CASSLMGVRDTEA	HLA-B*08:01	RAKFKQLL	McPAS	Immunogenic peptide
CASSLPGTSGISQDTQY	HLA-B*08:01	RAKFKQLL	McPAS_IEDB_VDJdb	Immunogenic peptide
CASSLPRGRDNEQ	HLA-B*08:01	RAKFKQLL	McPAS	Immunogenic peptide
CASSLSSPGNQPQH	HLA-B*08:01	RAKFKQLL	McPAS_IEDB_VDJdb	Immunogenic peptide
CASSLSVSTSLDTQY	HLA-A*02:01	YVLDHLIVV	McPAS_IEDB_VDJdb	Immunogenic peptide
CASSLTAPGIQPQH	HLA-B*08:01	RAKFKQLL	McPAS_IEDB_VDJdb	Immunogenic peptide
CASSLTEAGNQPHH	HLA-B*08:01	RAKFKQLL	McPAS_IEDB	Immunogenic peptide
CASSLTEAGNQPHQ	HLA-B*08:01	RAKFKQLL	McPAS_IEDB	Immunogenic peptide
CASSLTGAGDQPQH	HLA-B*08:01	RAKFKQLL	McPAS_IEDB_VDJdb	Immunogenic peptide
CASSLTGPGDQPQH	HLA-B*08:01	RAKFKQLL	McPAS_IEDB_VDJdb	Immunogenic peptide
CASSLTLLGNNEQY	HLA-B*08:01	RAKFKQLL	McPAS_IEDB_VDJdb	Immunogenic peptide
CASSLTSATGEL	HLA-A*11:01	AVFDRKSDAK	McPAS	Immunogenic peptide
CASSLTTGIQY	HLA-A*02:01	YVLDHLIVV	McPAS_IEDB_VDJdb	Immunogenic peptide
CASSLTVAGDTEA	HLA-B*08:01	RAKFKQLL	McPAS	Immunogenic peptide
CASSLVLSSPTYEQY	HLA-B*08:01	RAKFKQLL	McPAS_IEDB_VDJdb	Immunogenic peptide
CASSLVSSGANVLT	HLA-B*08:01	RAKFKQLL	McPAS_IEDB_VDJdb	Immunogenic peptide
CASSLVTGEGLGEQ	HLA-B*08:01	RAKFKQLL	McPAS	Immunogenic peptide
CASSLVVAGGLYEQ	HLA-B*08:01	RAKFKQLL	McPAS	Immunogenic peptide
CASSLVVIQETQY	HLA-B*08:01	RAKFKQLL	McPAS_IEDB_VDJdb	Immunogenic peptide
CASSLYSDTQY	HLA-A*02:01	YVLDHLIVV	McPAS_IEDB_VDJdb	Immunogenic peptide
CASSMLLGGGQPQH	HLA-A*02:01	YVLDHLIVV	McPAS_IEDB_VDJdb	Immunogenic peptide
CASSPGAGLYNEQ	HLA-A*02:01	YVLDHLIVV	McPAS	Immunogenic peptide
CASSPGQGVTPLH	HLA-B*08:01	RAKFKQLL	McPAS_IEDB_VDJdb	Immunogenic peptide
CASSPGQVTPLH	HLA-B*08:01	RAKFKQLL	McPAS_IEDB_VDJdb	Immunogenic peptide
CASSPGTGSYEQY	HLA-B*08:01	RAKFKQLL	McPAS_IEDB_VDJdb	Immunogenic peptide
CASSPGTLSALGEL	HLA-A*02:01	GLCTLVAML	McPAS	Immunogenic peptide
CASSPITRIVGDTQY	HLA-B*08:01	RAKFKQLL	McPAS_IEDB_VDJdb	Immunogenic peptide
CASSPLIGTSGTEA	HLA-B*08:01	RAKFKQLL	McPAS	Immunogenic peptide
CASSPPGTPGRGWYDT	HLA-B*08:01	RAKFKQLL	McPAS	Immunogenic peptide
CASSPPLGLHTGEL	HLA-A*02:01	YVLDHLIVV	McPAS	Immunogenic peptide
CASSPSLVGSADTQY	HLA-A*02:01	YVLDHLIVV	McPAS_IEDB_VDJdb	Immunogenic peptide
CASSPSPGDNEQ	HLA-B*08:01	RAKFKQLL	McPAS	Immunogenic peptide
CASSPTGAGNQPQH	HLA-B*08:01	RAKFKQLL	McPAS_IEDB_VDJdb	Immunogenic peptide
CASSPTGSGGGDEETQY	HLA-B*08:01	RAKFKQLL	McPAS	Immunogenic peptide
CASSPTSGEYNEQ	HLA-B*08:01	RAKFKQLL	McPAS	Immunogenic peptide
CASSPWASGTQETQY	HLA-B*08:01	RAKFKQLL	McPAS_IEDB_VDJdb	Immunogenic peptide
CASSPYGIDEQY	HLA-B*08:01	RAKFKQLL	McPAS_IEDB_VDJdb	Immunogenic peptide
CASSQAGQGNSPLH	HLA-B*08:01	RAKFKQLL	McPAS_IEDB_VDJdb	Immunogenic peptide
CASSQAQGMGNSPLH	HLA-B*08:01	RAKFKQLL	McPAS_IEDB_VDJdb	Immunogenic peptide
CASSQEGTGSYEQY	HLA-A*11:01	AVFDRKSDAK	McPAS_IEDB_VDJdb	Immunogenic peptide
CASSQETGSYEQ	HLA-B*08:01	RAKFKQLL	McPAS	Immunogenic peptide
CASSQGPNLQETQY	HLA-B*08:01	RAKFKQLL	McPAS_IEDB_VDJdb	Immunogenic peptide
CASSQGTGGGYGYT	HLA-B*08:01	RAKFKQLL	McPAS_IEDB_VDJdb	Immunogenic peptide
CASSQGVGENTEA	HLA-B*08:01	RAKFKQLL	McPAS	Immunogenic peptide
CASSQIVTSAAQY	HLA-B*08:01	RAKFKQLL	McPAS_IEDB_VDJdb	Immunogenic peptide
CASSQLGQSETQY	HLA-B*08:01	RAKFKQLL	McPAS_IEDB_VDJdb	Immunogenic peptide
CASSQSIGGEL	HLA-B*08:01	RAKFKQLL	McPAS	Immunogenic peptide
CASSQTLAGGGETQY	HLA-A*02:01	YVLDHLIVV	McPAS_IEDB_VDJdb	Immunogenic peptide
CASSQTTSVNTEA	HLA-B*08:01	RAKFKQLL	McPAS	Immunogenic peptide
CASSQVQGTSGGEQY	HLA-B*08:01	RAKFKQLL	McPAS_IEDB_VDJdb	Immunogenic peptide
CASSQVRGGYEQ	HLA-B*08:01	RAKFKQLL	McPAS	Immunogenic peptide
CASSQVRGRGEQY	HLA-B*08:01	RAKFKQLL	McPAS_IEDB_VDJdb	Immunogenic peptide
CASSRGQGSADTQY	HLA-A*02:01	YVLDHLIVV	McPAS_IEDB_VDJdb	Immunogenic peptide
CASSRGTGEGYEQY	HLA-B*08:01	RAKFKQLL	McPAS_IEDB_VDJdb	Immunogenic peptide
CASSRLDRDSYEQY	HLA-B*08:01	RAKFKQLL	McPAS_IEDB_VDJdb	Immunogenic peptide
CASSRTDDTEA	HLA-B*08:01	RAKFKQLL	McPAS	Immunogenic peptide
CASSRTSATGEL	HLA-A*11:01	AVFDRKSDAK	McPAS_IEDB	Immunogenic peptide
CASSRTSGGFYNEQE	HLA-A*11:01	IVTDFSVIK	McPAS	Immunogenic peptide
CASSSDPSGSIAYEQY	HLA-B*08:01	RAKFKQLL	McPAS_IEDB_VDJdb	Immunogenic peptide
CASSSGQAYEQ	HLA-B*08:01	FLRGRAYGL	McPAS_IEDB	Immunogenic peptide
CASSSHVINQ	HLA-B*08:01	RAKFKQLL	McPAS	Immunogenic peptide
CASSSLQGNGQPQH	HLA-A*02:01	YVLDHLIVV	McPAS_IEDB_VDJdb	Immunogenic peptide
CASSSMVAGEYEQ	HLA-B*08:01	RAKFKQLL	McPAS	Immunogenic peptide
CASSSNRDRNTIY	HLA-B*08:01	RAKFKQLL	McPAS_IEDB_VDJdb	Immunogenic peptide
CASSSPGDYTYEQY	HLA-A*02:01	YVLDHLIVV	McPAS_IEDB_VDJdb	Immunogenic peptide
CASSSPGGRGNTEA	HLA-A*02:01	YVLDHLIVV	McPAS	Immunogenic peptide
CASSSTGPGNSPLH	HLA-B*08:01	RAKFKQLL	McPAS_IEDB_VDJdb	Immunogenic peptide
CASSSTGRDTDTQY	HLA-B*08:01	RAKFKQLL	McPAS_IEDB_VDJdb	Immunogenic peptide
CASSTGRVAPGEL	HLA-A*02:01	GLCTLVAML	McPAS	Immunogenic peptide
CASSTPTSGVNTGEL	HLA-B*08:01	RAKFKQLL	McPAS	Immunogenic peptide
CASSTTRAGDQPQH	HLA-B*08:01	RAKFKQLL	McPAS_IEDB_VDJdb	Immunogenic peptide
CASSVAGGDEQ	HLA-A*02:01	GLCTLVAML	McPAS	Immunogenic peptide
CASSVASGTDTQY	HLA-B*08:01	FLRGRAYGL	McPAS_IEDB_VDJdb	Immunogenic peptide
CASSVGDWAQGNTIY	HLA-A*11:01	IVTDFSVIK	McPAS_IEDB_VDJdb	Immunogenic peptide
CASSVLAGDTQY	HLA-B*08:01	RAKFKQLL	McPAS_IEDB_VDJdb	Immunogenic peptide
CASSWGQGSNYGYT	HLA-A*11:01	IVTDFSVIK	McPAS_IEDB_VDJdb	Immunogenic peptide
CASSYLDGSTNSPLH	HLA-B*08:01	RAKFKQLL	McPAS	Immunogenic peptide
CASSYMGVEQ	HLA-A*02:01	YVLDHLIVV	McPAS	Immunogenic peptide
CASTAGQTTNFNEQ	HLA-A*02:01	GLCTLVAML	McPAS	Immunogenic peptide
CASTREGNLTGEL	HLA-A*02:01	GLCTLVAML	McPAS	Immunogenic peptide
CASTTEGGLIHEKL	HLA-A*02:01	YVLDHLIVV	McPAS	Immunogenic peptide
CATKRTGTDTQY	HLA-B*08:01	RAKFKQLL	McPAS_IEDB_VDJdb	Immunogenic peptide
CATSAGTPDNEQ	HLA-B*08:01	RAKFKQLL	McPAS	Immunogenic peptide
CATSDWAGEMETQY	HLA-A*02:01	YVLDHLIVV	McPAS_IEDB_VDJdb	Immunogenic peptide
CATSSFPRLEWDEQ	HLA-B*08:01	RAKFKQLL	McPAS	Immunogenic peptide
CATTQYGTDTQY	HLA-B*08:01	RAKFKQLL	McPAS_IEDB_VDJdb	Immunogenic peptide
CATWTGTYEQY	HLA-A*02:01	YVLDHLIVV	McPAS	Immunogenic peptide
CAWSGLSGSYNEQ	HLA-A*02:01	YVLDHLIVV	McPAS	Immunogenic peptide
CSAIPSYLSIGEQ	HLA-A*02:01	YVLDHLIVV	McPAS	Immunogenic peptide
CSANDRSYNEQ	HLA-A*02:01	YVLDHLIVV	McPAS	Immunogenic peptide
CSAPIPPYNEQ	HLA-A*02:01	YVLDHLIVV	McPAS	Immunogenic peptide
CSARDEVGNTIY	HLA-A*02:01	GLCTLVAML	McPAS_VDJdb	Immunogenic peptide
CSARDRVGNGYT	HLA-A*02:01	GLCTLVAML	McPAS_IEDB_VDJdb	Immunogenic peptide
CSARGAGFSGANVLT	HLA-A*02:01	YVLDHLIVV	McPAS_IEDB_VDJdb	Immunogenic peptide
CSARGEAITKEL	HLA-A*02:01	GLCTLVAML	McPAS	Immunogenic peptide
CSARPTSNYEQ	HLA-A*02:01	YVLDHLIVV	McPAS	Immunogenic peptide
CSARSRVGNTIY	HLA-A*02:01	GLCTLVAML	McPAS_IEDB_VDJdb_10X	Immunogenic peptide
CSASNQESYGYT	HLA-A*02:01	YVLDHLIVV	McPAS_IEDB_VDJdb	Immunogenic peptide
CSGGTDGTNEKEL	HLA-A*02:01	GLCTLVAML	McPAS	Immunogenic peptide
CSQTNREYNEQ	HLA-A*02:01	YVLDHLIVV	McPAS	Immunogenic peptide
CSSLGTSFRTDTQY	HLA-A*02:01	YVLDHLIVV	McPAS	Immunogenic peptide
CSSSLRGSNQPQH	HLA-A*02:01	YVLDHLIVV	McPAS	Immunogenic peptide
CSSSLTGSGQPQH	HLA-A*02:01	YVLDHLIVV	McPAS	Immunogenic peptide
CSTGTGEGGTQY	HLA-B*08:01	RAKFKQLL	McPAS_IEDB_VDJdb	Immunogenic peptide
CSVGGTFYGYT	HLA-A*02:01	GLCTLVAML	McPAS_IEDB_TBA_VDJdb	Immunogenic peptide
CSVGSVGTNEKEL	HLA-A*02:01	GLCTLVAML	McPAS	Immunogenic peptide
CSVGTGGTNEKEL	HLA-A*02:01	GLCTLVAML	McPAS	Immunogenic peptide
CSVGTVGTNEKEL	HLA-A*02:01	GLCTLVAML	McPAS	Immunogenic peptide
CSVSAGEEDTQY	HLA-B*08:01	RAKFKQLL	McPAS_IEDB_VDJdb	Immunogenic peptide
CVSGWGSQPQH	HLA-A*11:01	AVFDRKSDAK	McPAS_IEDB	Immunogenic peptide
CASKGTVTGEL	HLA-A*24:02	RYPLTFGWCF	McPAS	Immunogenic peptide
CASLPSVGKGAYEQY	HLA-A*24:02	RYPLTFGWCF	McPAS_TBA	Immunogenic peptide
CASSAPRETQY	HLA-A*24:02	RYPLTFGWCF	McPAS_TBA	Immunogenic peptide
CASSDFSKGTDTQY	HLA-A*24:02	RYPLTFGWCF	McPAS_TBA	Immunogenic peptide
CASSDTSGANTGEL	HLA-A*24:02	RYPLTFGW	McPAS	Immunogenic peptide
CASSDVGQGSSNYGYT	HLA-A*24:02	RYPLTFGWCF	McPAS_TBA	Immunogenic peptide
CASSEGFGQGGIEQ	HLA-A*24:02	RYPLTFGWCF	McPAS	Immunogenic peptide
CASSETGGTYEQY	HLA-A*24:02	RYPLTFGWCF	McPAS_TBA	Immunogenic peptide
CASSIDPPGLADNEQ	HLA-A*24:02	RYPLTFGWCF	McPAS	Immunogenic peptide
CASSIRDRVPETQY	HLA-A*24:02	RYPLTFGW	McPAS_TBA	Immunogenic peptide
CASSISAGEGVPEQY	HLA-A*24:02	RYPLTFGWCF	McPAS_IEDB_TBA	Immunogenic peptide
CASSLAVRGLSGDP	HLA-A*24:02	RYPLTFGW	McPAS	Immunogenic peptide
CASSLESLGLASVDEQ	HLA-A*24:02	RYPLTFGWCF	McPAS	Immunogenic peptide
CASSLGRDRPTPYEQY	HLA-A*24:02	RYPLTFGWCF	McPAS_TBA	Immunogenic peptide
CASSLMGLAGVPGEL	HLA-A*24:02	RYPLTFGWCF	McPAS_TBA	Immunogenic peptide
CASSLRPGRANTGEL	HLA-A*24:02	RYPLTFGWCF	McPAS	Immunogenic peptide
CASSLTSGANTGEL	HLA-A*24:02	RYPLTFGW	McPAS	Immunogenic peptide
CASSLVSGRGNEQ	HLA-A*24:02	RYPLTFGWCF	McPAS	Immunogenic peptide
CASSPGSGELGAGEL	HLA-A*24:02	RYPLTFGWCF	McPAS	Immunogenic peptide
CASSPRDKPNYGYT	HLA-A*24:02	RYPLTFGW	McPAS_TBA	Immunogenic peptide
CASSPSTGKGNQPQH	HLA-A*24:02	RYPLTFGWCF	McPAS_TBA	Immunogenic peptide
CASSPVAGVYEQY	HLA-A*24:02	RYPLTFGWCF	McPAS_TBA	Immunogenic peptide
CASSQPTGREQY	HLA-A*24:02	RYPLTFGW	McPAS_IEDB_TBA	Immunogenic peptide
CASSQRDRGTDTEA	HLA-A*24:02	RYPLTFGWCF	McPAS	Immunogenic peptide
CASSQRDSQETQY	HLA-A*24:02	RYPLTFGWCF	McPAS	Immunogenic peptide
CASSQSPGQGVGEQ	HLA-A*24:02	RYPLTFGWCF	McPAS	Immunogenic peptide
CASSQSRQGAQPQH	HLA-A*24:02	RYPLTFGWCF	McPAS_TBA	Immunogenic peptide
CASSSLGQGAPEA	HLA-A*24:02	RYPLTFGWCF	McPAS	Immunogenic peptide
CASSSPGQGYGYT	HLA-A*24:02	RYPLTFGWCF	McPAS_TBA	Immunogenic peptide
CASSTALRTGNYGYT	HLA-A*24:02	RYPLTFGWCF	McPAS_TBA	Immunogenic peptide
CASSYDRGYEQY	HLA-A*24:02	RYPLTFGWCF	McPAS_TBA	Immunogenic peptide
CASSYDRSYEQY	HLA-A*24:02	RYPLTFGWCF	McPAS_TBA	Immunogenic peptide
CASSYSHRLGLHEQY	HLA-A*24:02	RYPLTFGWCF	McPAS_IEDB_TBA	Immunogenic peptide
CASSYSIGTGVNNYGYT	HLA-A*24:02	RYPLTFGWCF	McPAS_TBA	Immunogenic peptide
CASTSFGQGTNEQ	HLA-A*24:02	RYPLTFGWCF	McPAS	Immunogenic peptide
CASTTSNEQ	HLA-A*24:02	RYPLTFGWCF	McPAS	Immunogenic peptide
CSARDPIRLISYEQY	HLA-A*24:02	RYPLTFGW	McPAS_IEDB_TBA	Immunogenic peptide
CSARDPVSTYEQY	HLA-A*24:02	RYPLTFGW	McPAS_IEDB_TBA	Immunogenic peptide
CACSIRSAYEQY	HLA-A*02:01	GILGFVFTL	McPAS	Immunogenic peptide
CAISATGGDYGYT	HLA-B*07:02	TPRVTGGGAM	McPAS_VDJdb	Immunogenic peptide
CAISEPGTSTDTQY	HLA-A*02:01	YSEHPTFTSQY	McPAS	Immunogenic peptide
CAISEPTSGRDTQY	HLA-A*02:01	YSEHPTFTSQY	McPAS	Immunogenic peptide
CAISESGSPEQY	HLA-A*02:01	YSEHPTFTSQY	McPAS	Immunogenic peptide
CAISEWDIHSSGNTIY	HLA-A*02:01	NLVPMVATV	McPAS_VDJdb	Immunogenic peptide
CAISGPGGPTGEL	HLA-A*02:01	YSEHPTFTSQY	McPAS	Immunogenic peptide
CARTGNYGYT	HLA-B*08:01	QIKVRVKMV	McPAS	Immunogenic peptide
CASALGASGITQY	HLA-B*07:02	TPRVTGGGAM	McPAS_VDJdb	Immunogenic peptide
CASDSGVFSYEQY	HLA-B*07:02	TPRVTGGGAM	McPAS_VDJdb	Immunogenic peptide
CASGLGSSPMFNEQ	HLA-B*07:02	TPRVTGGGAM	McPAS	Immunogenic peptide
CASKWTSGGPNTGEL	HLA-B*08:01	QIKVRVKMV	McPAS	Immunogenic peptide
CASMGLPGYEQ	HLA-A*02:01	YSEHPTFTSQY	McPAS	Immunogenic peptide
CASQDTNSYEQY	HLA-B*35:02	EPLPQGQLTAY	McPAS	Immunogenic peptide
CASRIGGAPNNEQ	HLA-B*07:02	TPRVTGGGAM	McPAS	Immunogenic peptide
CASRLGLAGGINEQ	HLA-B*07:02	TPRVTGGGAM	McPAS	Immunogenic peptide
CASRRRESHAYEQY	HLA-B*08:01	QIKVRVKMV	McPAS_TBA_VDJdb	Immunogenic peptide
CASRTGTGNLYEQY	HLA-B*07:02	TPRVTGGGAM	McPAS_VDJdb	Immunogenic peptide
CASRTGTGSYRQY	HLA-B*07:02	TPRVTGGGAM	McPAS_VDJdb	Immunogenic peptide
CASRVGLAGNNEQ	HLA-B*07:02	TPRVTGGGAM	McPAS	Immunogenic peptide
CASSARATDTQY	HLA-A*02:01	GILGFVFTL	McPAS_VDJdb	Immunogenic peptide
CASSATGSTYEQY	HLA-A*02:01	GILGFVFTL	McPAS_VDJdb	Immunogenic peptide
CASSDTPQPFSSGYT	HLA-B*35:01	EPLPQGQLTAY	McPAS_VDJdb	Immunogenic peptide
CASSDVAPAPFYGYT	HLA-B*35:01	EPLPQGQLTAY	McPAS_VDJdb	Immunogenic peptide
CASSEPSTANEQ	HLA-A*02:01	YSEHPTFTSQY	McPAS	Immunogenic peptide
CASSESEQGYTGEL	HLA-B*08:01	QIKVRVKMV	McPAS	Immunogenic peptide
CASSFQGADYGYT	HLA-B*07:02	TPRVTGGGAM	McPAS_VDJdb	Immunogenic peptide
CASSGGQGRTMNTEA	HLA-B*08:01	QIKVRVKMV	McPAS	Immunogenic peptide
CASSGGSSDTQY	HLA-A*02:01	YSEHPTFTSQY	McPAS	Immunogenic peptide
CASSGRSNTEA	HLA-A*02:01	GILGFVFTL	McPAS	Immunogenic peptide
CASSGRSTDTQY	HLA-A*02:01	GILGFVFTL	McPAS_IEDB_TBA_VDJdb	Immunogenic peptide
CASSIDLRGYQNIQY	HLA-B*35:01	EPLPQGQLTAY	McPAS_VDJdb	Immunogenic peptide
CASSIGTANNSPLH	HLA-B*07:02	TPRVTGGGAM	McPAS_VDJdb	Immunogenic peptide
CASSIISVDGYT	HLA-A*02:01	GILGFVFTL	McPAS_VDJdb	Immunogenic peptide
CASSIRSAYEQY	HLA-A*02:01	GILGFVFTL	McPAS_IEDB_TBA_VDJdb_10X	Immunogenic peptide
CASSIRSNTEA	HLA-A*02:01	GILGFVFTL	McPAS	Immunogenic peptide
CASSIRSSYEQY	HLA-A*02:01	GILGFVFTL	McPAS_IEDB_TBA_VDJdb	Immunogenic peptide
CASSITSSYNEQ	HLA-A*02:01	GILGFVFTL	McPAS	Immunogenic peptide
CASSIYSNTEA	HLA-A*02:01	GILGFVFTL	McPAS	Immunogenic peptide
CASSKDPPGTGGASGYT	HLA-B*07:02	TPRVTGGGAM	McPAS_VDJdb	Immunogenic peptide
CASSKEDREKETQY	HLA-B*07:02	TPRVTGGGAM	McPAS_VDJdb	Immunogenic peptide
CASSLEGDMDSEQY	HLA-A*02:01	YSEHPTFTSQY	McPAS	Immunogenic peptide
CASSLEGFTDTQY	HLA-B*08:01	QIKVRVKMV	McPAS_TBA_VDJdb	Immunogenic peptide
CASSLEGTGANSPLH	HLA-B*07:02	TPRVTGGGAM	McPAS_VDJdb	Immunogenic peptide
CASSLFLAGGYEQY	HLA-A*02:01	YSEHPTFTSQY	McPAS	Immunogenic peptide
CASSLGAAGREL	HLA-B*07:02	TPRVTGGGAM	McPAS	Immunogenic peptide
CASSLGPAGNTEA	HLA-B*07:02	TPRVTGGGAM	McPAS	Immunogenic peptide
CASSLGPASYEQY	HLA-B*07:02	TPRVTGGGAM	McPAS_VDJdb	Immunogenic peptide
CASSLGPATYEQY	HLA-B*07:02	TPRVTGGGAM	McPAS	Immunogenic peptide
CASSLGPNNYYGYT	HLA-B*07:02	TPRVTGGGAM	McPAS_VDJdb	Immunogenic peptide
CASSLGQLYGYT	HLA-A*02:01	YSEHPTFTSQY	McPAS	Immunogenic peptide
CASSLGSANTDTQY	HLA-B*07:02	TPRVTGGGAM	McPAS_VDJdb	Immunogenic peptide
CASSLGSTPYEQY	HLA-B*07:02	TPRVTGGGAM	McPAS_VDJdb	Immunogenic peptide
CASSLGVSEPQH	HLA-B*08:01	QIKVRVKMV	McPAS_TBA_VDJdb	Immunogenic peptide
CASSLGWEYNEQ	HLA-B*08:01	QIKVRVKMV	McPAS	Immunogenic peptide
CASSLLRDSPTDTQY	HLA-A*02:01	YSEHPTFTSQY	McPAS	Immunogenic peptide
CASSLMTGEL	HLA-B*35:01	HPVGEADYFEY	McPAS	Immunogenic peptide
CASSLPSGGTNNEQ	HLA-B*07:02	RPPIFIRRL	McPAS	Immunogenic peptide
CASSLSHSTGNYGYT	HLA-B*07:02	TPRVTGGGAM	McPAS_VDJdb	Immunogenic peptide
CASSLSPGQKYEQY	HLA-B*07:02	TPRVTGGGAM	McPAS_VDJdb	Immunogenic peptide
CASSLSPSTGRVEQY	HLA-B*07:02	TPRVTGGGAM	McPAS_VDJdb	Immunogenic peptide
CASSLSRGAYEQY	HLA-B*08:01	QIKVRVKMV	McPAS_TBA_VDJdb	Immunogenic peptide
CASSLSVGVNTEA	HLA-B*07:02	TPRVTGGGAM	McPAS	Immunogenic peptide
CASSLSYSTLSYEQY	HLA-B*07:02	TPRVTGGGAM	McPAS_VDJdb	Immunogenic peptide
CASSLTGGYNEQ	HLA-B*35:01	HPVGEADYFEY	McPAS	Immunogenic peptide
CASSLTQGLAGVEQY	HLA-B*08:01	QIKVRVKMV	McPAS_TBA_VDJdb	Immunogenic peptide
CASSLWGALYEQY	HLA-B*08:01	QIKVRVKMV	McPAS_TBA_VDJdb	Immunogenic peptide
CASSMFALDTQY	HLA-A*02:01	GILGFVFTL	McPAS_VDJdb	Immunogenic peptide
CASSMGSYGYT	HLA-A*02:01	GILGFVFTL	McPAS_IEDB_VDJdb_10X	Immunogenic peptide
CASSMRSSYEQY	HLA-A*02:01	GILGFVFTL	McPAS_IEDB_TBA_VDJdb_10X	Immunogenic peptide
CASSPASGAFGYNEQ	HLA-B*35:02	EPLPQGQLTAY	McPAS	Immunogenic peptide
CASSPDRGLNNEQ	HLA-A*02:01	YSEHPTFTSQY	McPAS	Immunogenic peptide
CASSPGGQGGQPQH	HLA-B*08:01	QIKVRVKMV	McPAS_TBA_VDJdb	Immunogenic peptide
CASSPGKLDSEETQY	HLA-B*07:02	TPRVTGGGAM	McPAS_VDJdb	Immunogenic peptide
CASSPGLGAEA	HLA-A*02:01	YSEHPTFTSQY	McPAS	Immunogenic peptide
CASSPGSWGSTDTQY	HLA-A*02:01	YSEHPTFTSQY	McPAS	Immunogenic peptide
CASSPLFGREPDGETQY	HLA-A*02:01	NLVPMVATV	McPAS_VDJdb	Immunogenic peptide
CASSPRDSQPYGYT	HLA-B*07:02	TPRVTGGGAM	McPAS_VDJdb	Immunogenic peptide
CASSPSDPGANVLT	HLA-A*02:01	GLCTLVAML	McPAS_VDJdb	Immunogenic peptide
CASSPSGTSPKNEQ	HLA-B*35:01	HPVGEADYFEY	McPAS	Immunogenic peptide
CASSPVGPWDEKL	HLA-A*02:01	YSEHPTFTSQY	McPAS	Immunogenic peptide
CASSQDGAGGLGEQ	HLA-A*02:01	GLCTLVAML	McPAS_IEDB	Immunogenic peptide
CASSQDGLAGGAFNEQ	HLA-A*02:01	GLCTLVAML	McPAS	Immunogenic peptide
CASSQRSTGEL	HLA-A*02:01	GILGFVFTL	McPAS	Immunogenic peptide
CASSQVLGVLSSYEQY	HLA-A*02:01	YSEHPTFTSQY	McPAS	Immunogenic peptide
CASSQVLRVLSYNEQ	HLA-A*02:01	YSEHPTFTSQY	McPAS	Immunogenic peptide
CASSQWERDPQY	HLA-A*02:01	YSEHPTFTSQY	McPAS	Immunogenic peptide
CASSRLAGGTGEL	HLA-B*08:01	QIKVRVKMV	McPAS	Immunogenic peptide
CASSRLAGSTDTQY	HLA-B*08:01	QIKVRVKMV	McPAS_TBA_VDJdb	Immunogenic peptide
CASSRLGGGHRGAV	HLA-B*08:01	QIKVRVKMV	McPAS	Immunogenic peptide
CASSSGQEA	HLA-B*07:02	TPRVTGGGAM	McPAS	Immunogenic peptide
CASSSGTSGYEQY	HLA-B*08:01	QIKVRVKMV	McPAS_TBA_VDJdb	Immunogenic peptide
CASSSGTSGYYNEQ	HLA-A*02:01	GLCTLVAML	McPAS	Immunogenic peptide
CASSSPRESTDTQY	HLA-A*02:01	YSEHPTFTSQY	McPAS	Immunogenic peptide
CASSSPRLAGGPSGTGEL	HLA-A*02:01	YSEHPTFTSQY	McPAS	Immunogenic peptide
CASSSQRESSDTQY	HLA-A*02:01	YSEHPTFTSQY	McPAS	Immunogenic peptide
CASSSREVTGEL	HLA-B*08:01	QIKVRVKMV	McPAS	Immunogenic peptide
CASSSSSWDRPQH	HLA-B*07:02	TPRVTGGGAM	McPAS_VDJdb	Immunogenic peptide
CASSSTLAGGPYEQ	HLA-A*02:01	YSEHPTFTSQY	McPAS	Immunogenic peptide
CASSTQDLQGARSPLH	HLA-B*07:02	TPRVTGGGAM	McPAS_VDJdb	Immunogenic peptide
CASSTRSGTEQY	HLA-A*02:01	GILGFVFTL	McPAS_VDJdb	Immunogenic peptide
CASSTRSSYEQY	HLA-A*02:01	GILGFVFTL	McPAS_IEDB_TBA_VDJdb_10X	Immunogenic peptide
CASSV	HLA-A*02:01	YSEHPTFTSQY	McPAS	Immunogenic peptide
CASSVGPGNTIY	HLA-B*07:02	TPRVTGGGAM	McPAS_VDJdb	Immunogenic peptide
CASSVRQEPYNEQ	HLA-A*01:01	VLEETSVML	McPAS	Immunogenic peptide
CASSYGPVETEA	HLA-B*08:01	QIKVRVKMV	McPAS	Immunogenic peptide
CASSYSPPIPGQGIDEQY	HLA-A*02:01	YSEHPTFTSQY	McPAS	Immunogenic peptide
CASTETSGSSYNEQ	HLA-B*07:02	TPRVTGGGAM	McPAS	Immunogenic peptide
CASTLGSAGPQFNEQ	HLA-B*07:02	TPRVTGGGAM	McPAS	Immunogenic peptide
CASTRADTGEL	HLA-A*02:01	YSEHPTFTSQY	McPAS	Immunogenic peptide
CASTSRVGEA	HLA-B*35:01	HPVGEADYFEY	McPAS	Immunogenic peptide
CASTSWGLQGPTGEL	HLA-A*02:01	YSEHPTFTSQY	McPAS	Immunogenic peptide
CATAEGAGEL	HLA-B*07:02	TPRVTGGGAM	McPAS	Immunogenic peptide
CATAQNRLQETQY	HLA-A*02:01	YSEHPTFTSQY	McPAS	Immunogenic peptide
CATSLLVRDNEQ	HLA-A*02:01	YSEHPTFTSQY	McPAS	Immunogenic peptide
CATSRPLDSTDTQY	HLA-A*02:01	YSEHPTFTSQY	McPAS	Immunogenic peptide
CATSRPTSGSDEQ	HLA-A*02:01	YSEHPTFTSQY	McPAS	Immunogenic peptide
CATSSPMGSTDTQY	HLA-A*02:01	YSEHPTFTSQY	McPAS	Immunogenic peptide
CATSSPQGASDEQY	HLA-A*02:01	YSEHPTFTSQY	McPAS	Immunogenic peptide
CATSSRDTSSDEQ	HLA-A*02:01	YSEHPTFTSQY	McPAS	Immunogenic peptide
CSADIQGAIGETQY	HLA-A*02:01	YSEHPTFTSQY	McPAS	Immunogenic peptide
CSAEDTSGITDTQY	HLA-A*02:01	YSEHPTFTSQY	McPAS	Immunogenic peptide
CSAPDRDTEA	HLA-A*02:01	YSEHPTFTSQY	McPAS	Immunogenic peptide
CSAPGWDTEA	HLA-A*02:01	YSEHPTFTSQY	McPAS	Immunogenic peptide
CSARDKTGNGYT	HLA-A*02:01	GLCTLVAML	McPAS_IEDB_VDJdb	Immunogenic peptide
CSARDQGEWGIKETQY	HLA-B*07:02	RPPIFIRRL	McPAS_VDJdb	Immunogenic peptide
CSARDRPGGPSNQPQH	HLA-A*02:01	GLCTLVAML	McPAS_VDJdb	Immunogenic peptide
CSARDSPGNGYT	HLA-A*02:01	GLCTLVAML	McPAS	Immunogenic peptide
CSARSRVGNTIY	HLA-A*02:01	GLCTLVAML	McPAS_IEDB_VDJdb_10X	Immunogenic peptide
CSGGALGQDFGGYT	HLA-B*07:02	TPRVTGGGAM	McPAS_VDJdb	Immunogenic peptide
CSGVVGRGAYNEQ	HLA-A*02:01	YSEHPTFTSQY	McPAS	Immunogenic peptide
CSGVVGRGAYNEQ	HLA-B*08:01	QIKVRVKMV	McPAS	Immunogenic peptide
CSGWGGTRDHGYT	HLA-B*08:01	QIKVRVKMV	McPAS_TBA_VDJdb	Immunogenic peptide
CSVDRHSYNEQ	HLA-B*08:01	QIKVRVKMV	McPAS	Immunogenic peptide
CSVEDLRNYGYT	HLA-A*02:01	YSEHPTFTSQY	McPAS	Immunogenic peptide
CSVEESGLAGNTGEL	HLA-B*08:01	QIKVRVKMV	McPAS	Immunogenic peptide
CSVEGLAGTGEL	HLA-A*02:01	YSEHPTFTSQY	McPAS	Immunogenic peptide
CSVEPLWSPEA	HLA-A*02:01	YSEHPTFTSQY	McPAS	Immunogenic peptide
CSVGEGANYGYT	HLA-A*02:01	YSEHPTFTSQY	McPAS	Immunogenic peptide
CSVGQGATEQY	HLA-A*01:01	VLEETSVML	McPAS	Immunogenic peptide
CSVGRDRDHGYT	HLA-B*08:01	QIKVRVKMV	McPAS_TBA_VDJdb	Immunogenic peptide
CSVGTGEDGEQY	HLA-A*02:01	YSEHPTFTSQY	McPAS	Immunogenic peptide
CSVPTVNTEA	HLA-A*02:01	YSEHPTFTSQY	McPAS	Immunogenic peptide
CSVRFSANYGYT	HLA-B*08:01	QIKVRVKMV	McPAS	Immunogenic peptide
CSVTGGTYEQY	HLA-A*02:01	YSEHPTFTSQY	McPAS	Immunogenic peptide
CSVWGETQY	HLA-A*02:01	YSEHPTFTSQY	McPAS	Immunogenic peptide
CVSSIRSAYEQY	HLA-A*02:01	GILGFVFTL	McPAS_IEDB	Immunogenic peptide
CVSSSGANVLT	HLA-B*07:02	TPRVTGGGAM	McPAS	Immunogenic peptide
CKNPTA	HLA-B*07:02	TPRVTGGGAM	McPAS	Immunogenic peptide
CASRMNTEA	HLA-A*02:01	ALTPVVVTL	McPAS_IEDB_TBA	Immunogenic peptide
CASRPFVNTEA	HLA-A*02:01	NLVPMVATV	McPAS_IEDB	Immunogenic peptide
CASSAQGFGEL	HLA-A*02:01	ALTPVVVTL	McPAS_IEDB_TBA	Immunogenic peptide
CASSEGRETQY	HLA-A*02:01	ALTPVVVTL	McPAS_IEDB_TBA_VDJdb	Immunogenic peptide
CASSFSLPYEQY	HLA-A*02:01	NLVPMVATV	McPAS_IEDB_TBA_VDJdb	Immunogenic peptide
CASSIGQGPYEQY	HLA-A*02:01	ALTPVVVTL	McPAS_IEDB_TBA_VDJdb	Immunogenic peptide
CASSLGGRRYEQY	HLA-A*02:01	ALTPVVVTL	McPAS_IEDB_TBA_VDJdb	Immunogenic peptide
CASSLGQKEQY	HLA-A*02:01	ALTPVVVTL	McPAS_IEDB_TBA_VDJdb	Immunogenic peptide
CASSSEFGDTAYNEQ	HLA-A*02:01	NLVPMVATV	McPAS_IEDB	Immunogenic peptide
CASTIVSGYT	HLA-A*02:01	NLVPMVATV	McPAS_IEDB	Immunogenic peptide
CASGVRSAYEQY	HLA-A*02:01	GILGFVFTL	McPAS_IEDB_VDJdb	Immunogenic peptide
CASRAGRAYEQY	HLA-A*02:01	GILGFVFTL	McPAS_IEDB_VDJdb	Immunogenic peptide
CASSADGILNTEA	HLA-A*02:01	GILGFVFTL	McPAS	Immunogenic peptide
CASSAGSYGYT	HLA-A*02:01	GILGFVFTL	McPAS_IEDB_VDJdb	Immunogenic peptide
CASSALGAGGDTQY	HLA-A*02:01	GILGFVFTL	McPAS_IEDB_VDJdb	Immunogenic peptide
CASSARSAETQY	HLA-A*02:01	GILGFVFTL	McPAS_IEDB_VDJdb	Immunogenic peptide
CASSARVGNEQY	HLA-A*02:01	GILGFVFTL	McPAS_IEDB_VDJdb	Immunogenic peptide
CASSASGRYNEQ	HLA-A*02:01	GILGFVFTL	McPAS	Immunogenic peptide
CASSETSINEQ	HLA-A*02:01	GILGFVFTL	McPAS	Immunogenic peptide
CASSFRSANEQ	HLA-A*02:01	GILGFVFTL	McPAS	Immunogenic peptide
CASSGRSAETQY	HLA-A*02:01	GILGFVFTL	McPAS_IEDB_VDJdb	Immunogenic peptide
CASSGRSAGEL	HLA-A*02:01	GILGFVFTL	McPAS	Immunogenic peptide
CASSIFGSYEQY	HLA-A*02:01	GILGFVFTL	McPAS_IEDB_VDJdb	Immunogenic peptide
CASSIFSAGNEQ	HLA-A*02:01	GILGFVFTL	McPAS	Immunogenic peptide
CASSIFSNQPQH	HLA-A*02:01	GILGFVFTL	McPAS_IEDB_VDJdb	Immunogenic peptide
CASSIGAYGYT	HLA-A*02:01	GILGFVFTL	McPAS_IEDB_VDJdb_10X	Immunogenic peptide
CASSIGHYGYT	HLA-A*02:01	GILGFVFTL	McPAS_IEDB_VDJdb	Immunogenic peptide
CASSIGLYGYT	HLA-A*02:01	GILGFVFTL	McPAS_IEDB_TBA_VDJdb	Immunogenic peptide
CASSIGYYGYT	HLA-A*02:01	GILGFVFTL	McPAS_IEDB_TBA_VDJdb_10X	Immunogenic peptide
CASSIHSGGNTEA	HLA-A*02:01	GILGFVFTL	McPAS	Immunogenic peptide
CASSILGASYNEQFT	HLA-A*02:01	GILGFVFTL	McPAS	Immunogenic peptide
CASSIQSTDTQY	HLA-A*02:01	GILGFVFTL	McPAS_IEDB_VDJdb	Immunogenic peptide
CASSIRAGEKL	HLA-A*02:01	GILGFVFTL	McPAS_IEDB	Immunogenic peptide
CASSIRAGYEQ	HLA-A*02:01	GILGFVFTL	McPAS	Immunogenic peptide
CASSIRAGYEQY	HLA-A*02:01	GILGFVFTL	McPAS_IEDB_VDJdb	Immunogenic peptide
CASSIRNSYNEQ	HLA-A*02:01	GILGFVFTL	McPAS	Immunogenic peptide
CASSIRSADTQY	HLA-A*02:01	GILGFVFTL	McPAS_IEDB_VDJdb_10X	Immunogenic peptide
CASSIRSAGEL	HLA-A*02:01	GILGFVFTL	McPAS	Immunogenic peptide
CASSIRSAWAQY	HLA-A*02:01	GILGFVFTL	McPAS_IEDB_VDJdb	Immunogenic peptide
CASSIRSAYERY	HLA-A*02:01	GILGFVFTL	McPAS_IEDB_VDJdb	Immunogenic peptide
CASSIRSGEPQH	HLA-A*02:01	GILGFVFTL	McPAS_IEDB_VDJdb	Immunogenic peptide
CASSIRSGNIQY	HLA-A*02:01	GILGFVFTL	McPAS_IEDB_VDJdb	Immunogenic peptide
CASSIRSGNTEA	HLA-A*02:01	GILGFVFTL	McPAS	Immunogenic peptide
CASSIRSGYEQY	HLA-A*02:01	GILGFVFTL	McPAS_IEDB_TBA_VDJdb_10X	Immunogenic peptide
CASSIRSNQPQH	HLA-A*02:01	GILGFVFTL	McPAS_IEDB_VDJdb_10X	Immunogenic peptide
CASSIRSQETQY	HLA-A*02:01	GILGFVFTL	McPAS_IEDB_VDJdb_10X	Immunogenic peptide
CASSIRSSEEQY	HLA-A*02:01	GILGFVFTL	McPAS_IEDB_VDJdb	Immunogenic peptide
CASSIRSSYGQY	HLA-A*02:01	GILGFVFTL	McPAS_IEDB_VDJdb	Immunogenic peptide
CASSIRSSYNEQ	HLA-A*02:01	GILGFVFTL	McPAS	Immunogenic peptide
CASSIRSTDTQY	HLA-A*02:01	GILGFVFTL	McPAS_IEDB_TBA_VDJdb	Immunogenic peptide
CASSIRSTGEL	HLA-A*02:01	GILGFVFTL	McPAS_IEDB	Immunogenic peptide
CASSIRSVAEA	HLA-A*02:01	GILGFVFTL	McPAS	Immunogenic peptide
CASSIRSVYEQY	HLA-A*02:01	GILGFVFTL	McPAS_IEDB_VDJdb	Immunogenic peptide
CASSISSTGEL	HLA-A*02:01	GILGFVFTL	McPAS_IEDB	Immunogenic peptide
CASSITGGEGGEL	HLA-A*02:01	GILGFVFTL	McPAS	Immunogenic peptide
CASSITSLGEL	HLA-A*02:01	GILGFVFTL	McPAS	Immunogenic peptide
CASSIVHAADTQY	HLA-A*02:01	GILGFVFTL	McPAS_IEDB_VDJdb	Immunogenic peptide
CASSIYRLGYEQY	HLA-A*02:01	GILGFVFTL	McPAS_IEDB_VDJdb	Immunogenic peptide
CASSKRSTDTQY	HLA-A*02:01	GILGFVFTL	McPAS_IEDB_TBA_VDJdb_10X	Immunogenic peptide
CASSKSASYEQY	HLA-A*02:01	GILGFVFTL	McPAS_IEDB_VDJdb	Immunogenic peptide
CASSLRSAYEQY	HLA-A*02:01	GILGFVFTL	McPAS_IEDB_VDJdb	Immunogenic peptide
CASSLRSTGEL	HLA-A*02:01	GILGFVFTL	McPAS	Immunogenic peptide
CASSMERTGSDTGEL	HLA-A*02:01	GILGFVFTL	McPAS	Immunogenic peptide
CASSMGSYGYT	HLA-A*02:01	GILGFVFTL	McPAS_IEDB_VDJdb_10X	Immunogenic peptide
CASSMRSAYEQY	HLA-A*02:01	GILGFVFTL	McPAS_IEDB_VDJdb_10X	Immunogenic peptide
CASSMRSGNTIY	HLA-A*02:01	GILGFVFTL	McPAS_IEDB_VDJdb	Immunogenic peptide
CASSMRSSGEQY	HLA-A*02:01	GILGFVFTL	McPAS_IEDB_VDJdb	Immunogenic peptide
CASSMRSSYEQY	HLA-A*02:01	GILGFVFTL	McPAS_IEDB_TBA_VDJdb_10X	Immunogenic peptide
CASSMRSTDTQY	HLA-A*02:01	GILGFVFTL	McPAS_IEDB_TBA_VDJdb_10X	Immunogenic peptide
CASSMVGGVYGYT	HLA-A*02:01	GILGFVFTL	McPAS_IEDB_VDJdb	Immunogenic peptide
CASSPHEAAEQY	HLA-A*02:01	GILGFVFTL	McPAS_IEDB_VDJdb	Immunogenic peptide
CASSPHGAAEQY	HLA-A*02:01	GILGFVFTL	McPAS_IEDB_VDJdb	Immunogenic peptide
CASSPQDRDFYEQY	HLA-A*02:01	GILGFVFTL	McPAS_IEDB_VDJdb	Immunogenic peptide
CASSPRSAGEL	HLA-A*02:01	GILGFVFTL	McPAS	Immunogenic peptide
CASSPRSAYEQY	HLA-A*02:01	GILGFVFTL	McPAS_IEDB_VDJdb	Immunogenic peptide
CASSPRSGETQY	HLA-A*02:01	GILGFVFTL	McPAS_IEDB_VDJdb	Immunogenic peptide
CASSQGFYGYT	HLA-A*02:01	GILGFVFTL	McPAS_IEDB_VDJdb	Immunogenic peptide
CASSQGSYGYT	HLA-A*02:01	GILGFVFTL	McPAS_IEDB_VDJdb_10X	Immunogenic peptide
CASSQRSTGEL	HLA-A*02:01	GILGFVFTL	McPAS	Immunogenic peptide
CASSRRSNQPQHFT	HLA-A*02:01	GILGFVFTL	McPAS	Immunogenic peptide
CASSRRSTQPQH	HLA-A*02:01	GILGFVFTL	McPAS_IEDB_VDJdb	Immunogenic peptide
CASSSGSYGYT	HLA-A*02:01	GILGFVFTL	McPAS_IEDB_VDJdb	Immunogenic peptide
CASSSRASYEQY	HLA-A*02:01	GILGFVFTL	McPAS_IEDB_TBA_VDJdb_10X	Immunogenic peptide
CASSSRSGEKL	HLA-A*02:01	GILGFVFTL	McPAS	Immunogenic peptide
CASSSRSGVEQY	HLA-A*02:01	GILGFVFTL	McPAS_IEDB_VDJdb_10X	Immunogenic peptide
CASSSRSGYEQY	HLA-A*02:01	GILGFVFTL	McPAS_IEDB_VDJdb	Immunogenic peptide
CASSTLTGGHQPQH	HLA-A*02:01	GILGFVFTL	McPAS_IEDB_VDJdb	Immunogenic peptide
CASSTRAAGEL	HLA-A*02:01	GILGFVFTL	McPAS	Immunogenic peptide
CASSTRAGETQY	HLA-A*02:01	GILGFVFTL	McPAS_IEDB_VDJdb	Immunogenic peptide
CASSTRSGDTQY	HLA-A*02:01	GILGFVFTL	McPAS_IEDB_VDJdb_10X	Immunogenic peptide
CASSTRSGWIQY	HLA-A*02:01	GILGFVFTL	McPAS_IEDB_VDJdb	Immunogenic peptide
CASSTRSQETQY	HLA-A*02:01	GILGFVFTL	McPAS_IEDB_VDJdb_10X	Immunogenic peptide
CASSTRSSSPQHFT	HLA-A*02:01	GILGFVFTL	McPAS	Immunogenic peptide
CASSTRSSYEQY	HLA-A*02:01	GILGFVFTL	McPAS_IEDB_TBA_VDJdb_10X	Immunogenic peptide
CASSTRSTDTQY	HLA-A*02:01	GILGFVFTL	McPAS_IEDB_TBA_VDJdb_10X	Immunogenic peptide
CASSTRSTYEQY	HLA-A*02:01	GILGFVFTL	McPAS_IEDB_VDJdb_10X	Immunogenic peptide
CASSTSSTDTQY	HLA-A*02:01	GILGFVFTL	McPAS_IEDB_VDJdb	Immunogenic peptide
CASSTWSTDTQY	HLA-A*02:01	GILGFVFTL	McPAS_IEDB_VDJdb	Immunogenic peptide
CASSVGSYGYT	HLA-A*02:01	GILGFVFTL	McPAS_IEDB_VDJdb_10X	Immunogenic peptide
CASSVRAAWEQY	HLA-A*02:01	GILGFVFTL	McPAS_IEDB_VDJdb	Immunogenic peptide
CASSVRSAYEQY	HLA-A*02:01	GILGFVFTL	McPAS_IEDB_VDJdb_10X	Immunogenic peptide
CASSVRSGDTQY	HLA-A*02:01	GILGFVFTL	McPAS_IEDB_VDJdb	Immunogenic peptide
CASSVRSTGAL	HLA-A*02:01	GILGFVFTL	McPAS	Immunogenic peptide
CASSVRSTGGL	HLA-A*02:01	GILGFVFTL	McPAS	Immunogenic peptide
CASSVYSNQPQHFT	HLA-A*02:01	GILGFVFTL	McPAS	Immunogenic peptide
CAGRASTGSGNTIY	HLA-B*42:01	TPQDLNTML	McPAS_TBA_VDJdb	Immunogenic peptide
CAGSEGRDQETQY	HLA-B*42:01	FPRPWLHGL	McPAS_TBA_VDJdb	Immunogenic peptide
CAGSLWSGIADTQY	HLA-B*42:01	FPRPWLHGL	McPAS_TBA_VDJdb	Immunogenic peptide
CANSIKGYNEQ	HLA-B*42:01	FPRPWLHGL	McPAS_TBA	Immunogenic peptide
CANSLYTGSDQPQH	HLA-B*42:01	FPRPWLHGL	McPAS_TBA_VDJdb	Immunogenic peptide
CAPTPEGGGQGQPQH	HLA-B*42:01	TPQDLNTML	McPAS_TBA_VDJdb	Immunogenic peptide
CASALEQGGYNEQ	HLA-B*42:01	IIKDYGKQM	McPAS_TBA	Immunogenic peptide
CASDKGTGNYGYT	HLA-B*42:01	TPQDLNTML	McPAS_TBA_VDJdb	Immunogenic peptide
CASEIGNSGQETQY	HLA-B*42:01	LPPIVAKEI	McPAS_TBA_VDJdb	Immunogenic peptide
CASGAAMNTEA	HLA-B*42:01	HPKVSSEVHI	McPAS_TBA	Immunogenic peptide
CASGDSGDEQ	HLA-B*42:01	IIKDYGKQM	McPAS_TBA	Immunogenic peptide
CASGHGMGASTSGYT	HLA-B*42:01	LPPIVAKEI	McPAS_TBA_VDJdb	Immunogenic peptide
CASGLAVPVDGYT	HLA-B*42:01	HPKVSSEVHI	McPAS_TBA_VDJdb	Immunogenic peptide
CASGLGANTIY	HLA-B*42:01	TPQDLNTML	McPAS_TBA_VDJdb	Immunogenic peptide
CASGLGPLTGLGPEA	HLA-B*42:01	HPKVSSEVHI	McPAS_TBA	Immunogenic peptide
CASIPNLGNEQ	HLA-B*42:01	LPPIVAKEI	McPAS_TBA	Immunogenic peptide
CASKLYTGGDQPQH	HLA-B*42:01	FPRPWLHGL	McPAS_TBA_VDJdb	Immunogenic peptide
CASLEGGSYT	HLA-B*42:01	IIKDYGKQM	McPAS_TBA_VDJdb	Immunogenic peptide
CASMGLVGGTDTQY	HLA-B*42:01	TPGPGVRYPL	McPAS_TBA_VDJdb	Immunogenic peptide
CASNPVFAAGGETQY	HLA-B*42:01	HPKVSSEVHI	McPAS_TBA_VDJdb	Immunogenic peptide
CASQLYSGGDQPQH	HLA-B*42:01	FPRPWLHGL	McPAS_TBA_VDJdb	Immunogenic peptide
CASRARRPSNTIY	HLA-B*42:01	TPQDLNTML	McPAS_TBA_VDJdb	Immunogenic peptide
CASRASTGSGNTIY	HLA-B*42:01	TPQDLNTML	McPAS_TBA_VDJdb	Immunogenic peptide
CASRDGQGHEQY	HLA-B*42:01	LPPIVAKEI	McPAS_TBA_VDJdb	Immunogenic peptide
CASRDPYEQY	HLA-B*42:01	TPQDLNTML	McPAS_TBA_VDJdb	Immunogenic peptide
CASRDRQSHEQY	HLA-B*42:01	LPPIVAKEI	McPAS_TBA_VDJdb	Immunogenic peptide
CASRGADTGEL	HLA-B*42:01	HPKVSSEVHI	McPAS_TBA	Immunogenic peptide
CASRGGPLTEA	HLA-B*42:01	HPKVSSEVHI	McPAS_TBA	Immunogenic peptide
CASRGTGESPLH	HLA-B*42:01	FPRPWLHGL	McPAS_TBA_VDJdb	Immunogenic peptide
CASRGTGVHEQY	HLA-B*42:01	IIKDYGKQM	McPAS_TBA_VDJdb	Immunogenic peptide
CASRKGIQETQY	HLA-B*42:01	TPGPGVRYPL	McPAS_TBA_VDJdb	Immunogenic peptide
CASRLLGPSTFFYGYT	HLA-B*42:01	TPGPGVRYPL	McPAS_TBA_VDJdb	Immunogenic peptide
CASRLYSGGDKEQY	HLA-B*42:01	FPRPWLHGL	McPAS_TBA_VDJdb	Immunogenic peptide
CASRPIGGAQETQY	HLA-B*42:01	TPGPGVRYPL	McPAS_TBA_VDJdb	Immunogenic peptide
CASRPPDTGEL	HLA-B*42:01	HPKVSSEVHI	McPAS_TBA	Immunogenic peptide
CASRQEGGGDGQPQH	HLA-B*42:01	TPQDLNTML	McPAS_TBA_VDJdb	Immunogenic peptide
CASRRDRDMNTEA	HLA-B*42:01	HPKVSSEVHI	McPAS_TBA	Immunogenic peptide
CASRRGFHQPQH	HLA-B*42:01	TPGPGVRYPL	McPAS_TBA_VDJdb	Immunogenic peptide
CASRRGSTYNEQ	HLA-B*42:01	HPKVSSEVHI	McPAS_TBA	Immunogenic peptide
CASRSGRTNEKL	HLA-B*42:01	FPRPWLHGL	McPAS_TBA	Immunogenic peptide
CASRSPDTGEL	HLA-B*42:01	HPKVSSEVHI	McPAS_TBA	Immunogenic peptide
CASRTGGEETQY	HLA-B*42:01	IIKDYGKQM	McPAS_TBA_VDJdb	Immunogenic peptide
CASRTSGEETQY	HLA-B*42:01	IIKDYGKQM	McPAS_TBA_VDJdb	Immunogenic peptide
CASRTSGGHEQ	HLA-B*42:01	IIKDYGKQM	McPAS_TBA	Immunogenic peptide
CASSASVIAGKL	HLA-B*42:01	LPPIVAKEI	McPAS_TBA	Immunogenic peptide
CASSDRQSLVQ	HLA-B*42:01	LPPIVAKEI	McPAS_TBA	Immunogenic peptide
CASSEDKGGADTQY	HLA-B*42:01	IIKDYGKQM	McPAS_TBA_VDJdb	Immunogenic peptide
CASSEDKGGGDTQY	HLA-B*42:01	IIKDYGKQM	McPAS_TBA_VDJdb	Immunogenic peptide
CASSEGRDQETQY	HLA-B*42:01	FPRPWLHGL	McPAS_TBA_VDJdb	Immunogenic peptide
CASSESGRGDTQY	HLA-B*42:01	TPGPGVRYPL	McPAS_TBA_VDJdb	Immunogenic peptide
CASSFGGTTEA	HLA-B*42:01	TPQDLNTML	McPAS_TBA	Immunogenic peptide
CASSFGLDEA	HLA-B*42:01	TPQDLNTML	McPAS_TBA	Immunogenic peptide
CASSFPQNTEA	HLA-B*42:01	LPPIVAKEI	McPAS_TBA	Immunogenic peptide
CASSFRQGLGHTGEL	HLA-B*42:01	FPRPWLHGL	McPAS_TBA	Immunogenic peptide
CASSFSKNTEA	HLA-B*42:01	TPQDLNTML	McPAS_TBA	Immunogenic peptide
CASSFTRQSPYNEQ	HLA-B*42:01	HPKVSSEVHI	McPAS_TBA	Immunogenic peptide
CASSFTSGVITGEL	HLA-B*42:01	LPPIVAKEI	McPAS_TBA	Immunogenic peptide
CASSFYPTDEQ	HLA-B*42:01	FPRPWLHGL	McPAS_TBA	Immunogenic peptide
CASSGMNTEA	HLA-B*42:01	LPPIVAKEI	McPAS_TBA	Immunogenic peptide
CASSGRDTSTDTQY	HLA-B*42:01	TPGPGVRYPL	McPAS_TBA_VDJdb	Immunogenic peptide
CASSHGMGASTSGYT	HLA-B*42:01	LPPIVAKEI	McPAS_TBA_VDJdb	Immunogenic peptide
CASSHLDSGLAVDTEA	HLA-B*42:01	FPRPWLHGL	McPAS_TBA	Immunogenic peptide
CASSHSKNTEA	HLA-B*42:01	TPQDLNTML	McPAS_TBA	Immunogenic peptide
CASSIKGYNEL	HLA-B*42:01	FPRPWLHGL	McPAS_TBA	Immunogenic peptide
CASSIKGYNEQ	HLA-B*42:01	FPRPWLHGL	McPAS_TBA	Immunogenic peptide
CASSIKGYNER	HLA-B*42:01	FPRPWLHGL	McPAS_TBA	Immunogenic peptide
CASSIQTGNSPLH	HLA-B*42:01	FPRPWLHGL	McPAS_TBA_VDJdb	Immunogenic peptide
CASSIQTVNSPLH	HLA-B*42:01	FPRPWLHGL	McPAS_TBA_VDJdb	Immunogenic peptide
CASSKDRGTDTQY	HLA-B*42:01	FPRPWLHGL	McPAS_TBA_VDJdb	Immunogenic peptide
CASSKPLYEQY	HLA-B*42:01	LPPIVAKEI	McPAS_TBA_VDJdb	Immunogenic peptide
CASSLAFGTSGGEQY	HLA-B*42:01	TPQDLNTML	McPAS_TBA_VDJdb	Immunogenic peptide
CASSLAGQGNGYT	HLA-B*42:01	HPKVSSEVHI	McPAS_TBA_VDJdb	Immunogenic peptide
CASSLALRGGDQETQY	HLA-B*42:01	IIKDYGKQM	McPAS_TBA_VDJdb	Immunogenic peptide
CASSLAQSREQY	HLA-B*42:01	LPPIVAKEI	McPAS_TBA_VDJdb	Immunogenic peptide
CASSLAQSRERY	HLA-B*42:01	LPPIVAKEI	McPAS_TBA	Immunogenic peptide
CASSLASDTQY	HLA-B*42:01	TPGPGVRYPL	McPAS_TBA_VDJdb	Immunogenic peptide
CASSLATDGYT	HLA-B*42:01	TPQDLNTML	McPAS_TBA_VDJdb	Immunogenic peptide
CASSLDPEKGA	HLA-B*42:01	TPQDLNTML	McPAS_TBA	Immunogenic peptide
CASSLDPRMNTEA	HLA-B*42:01	IIKDYGKQM	McPAS_TBA	Immunogenic peptide
CASSLEAPTDTQY	HLA-B*42:01	FPRPWLHGL	McPAS_TBA	Immunogenic peptide
CASSLEGTSGPQETQY	HLA-B*42:01	TPQDLNTML	McPAS_TBA_VDJdb	Immunogenic peptide
CASSLEGVPVE	HLA-B*42:01	FPRPWLHGL	McPAS_TBA	Immunogenic peptide
CASSLERSSEQY	HLA-B*42:01	FPRPWLHGL	McPAS_TBA_VDJdb	Immunogenic peptide
CASSLFGSPEQPQH	HLA-B*42:01	FPRPWLHGL	McPAS_TBA_VDJdb	Immunogenic peptide
CASSLFGSPGQPQH	HLA-B*42:01	FPRPWLHGL	McPAS_TBA_VDJdb	Immunogenic peptide
CASSLFSGASQTQY	HLA-B*42:01	FPRPWLHGL	McPAS_TBA_VDJdb	Immunogenic peptide
CASSLFSGGDQPQH	HLA-B*42:01	FPRPWLHGL	McPAS_TBA_VDJdb	Immunogenic peptide
CASSLFSGGEETQY	HLA-B*42:01	FPRPWLHGL	McPAS_TBA_VDJdb	Immunogenic peptide
CASSLFSGPSQTQY	HLA-B*42:01	FPRPWLHGL	McPAS_TBA_VDJdb	Immunogenic peptide
CASSLGADQPQH	HLA-B*42:01	HPKVSSEVHI	McPAS_TBA_VDJdb	Immunogenic peptide
CASSLGANTIY	HLA-B*42:01	TPQDLNTML	McPAS_TBA_VDJdb	Immunogenic peptide
CASSLGLNTIY	HLA-B*42:01	TPQDLNTML	McPAS_TBA_VDJdb	Immunogenic peptide
CASSLGPAAGYT	HLA-B*42:01	HPKVSSEVHI	McPAS_TBA_VDJdb	Immunogenic peptide
CASSLGPAIPGNTIY	HLA-B*42:01	HPKVSSEVHI	McPAS_TBA_VDJdb	Immunogenic peptide
CASSLGPLTGLGPEA	HLA-B*42:01	HPKVSSEVHI	McPAS_TBA	Immunogenic peptide
CASSLGPTEA	HLA-B*42:01	TPQDLNTML	McPAS_TBA	Immunogenic peptide
CASSLGPTVPGNAIY	HLA-B*42:01	HPKVSSEVHI	McPAS_VDJdb	Immunogenic peptide
CASSLGPTVPGNTIY	HLA-B*42:01	HPKVSSEVHI	McPAS_TBA_VDJdb	Immunogenic peptide
CASSLGPTVQGNYGYT	HLA-B*42:01	HPKVSSEVHI	McPAS_TBA_VDJdb	Immunogenic peptide
CASSLGPVEA	HLA-B*42:01	HPKVSSEVHI	McPAS_TBA	Immunogenic peptide
CASSLGVNTIY	HLA-B*42:01	TPQDLNTML	McPAS_TBA_VDJdb	Immunogenic peptide
CASSLMGASGANVLT	HLA-B*42:01	TPQDLNTML	McPAS_TBA_VDJdb	Immunogenic peptide
CASSLNGADGYT	HLA-B*42:01	TPQDLNTML	McPAS_TBA_VDJdb	Immunogenic peptide
CASSLRHLASDYNSPLH	HLA-B*42:01	TPQDLNTML	McPAS_TBA	Immunogenic peptide
CASSLSDVSWNTEA	HLA-B*42:01	TPQDLNTML	McPAS_TBA	Immunogenic peptide
CASSLSFTEA	HLA-B*42:01	TPQDLNTML	McPAS_TBA	Immunogenic peptide
CASSLSKNTEA	HLA-B*42:01	TPQDLNTML	McPAS_TBA	Immunogenic peptide
CASSLSPTEA	HLA-B*42:01	TPGPGVRYPL	McPAS_TBA	Immunogenic peptide
CASSLSRQGTGEL	HLA-B*42:01	TPGPGVRYPL	McPAS_TBA	Immunogenic peptide
CASSLSRTGFYEQY	HLA-B*42:01	HPKVSSEVHI	McPAS_TBA_VDJdb	Immunogenic peptide
CASSLVDPTGFGLETQY	HLA-B*42:01	IIKDYGKQM	McPAS_TBA_VDJdb	Immunogenic peptide
CASSLVFGTAGGQQ	HLA-B*42:01	TPQDLNTML	McPAS_TBA	Immunogenic peptide
CASSLVGPPGEA	HLA-B*42:01	LPPIVAKEI	McPAS_TBA	Immunogenic peptide
CASSLVGPPGEL	HLA-B*42:01	LPPIVAKEI	McPAS_TBA	Immunogenic peptide
CASSLVQSREQY	HLA-B*42:01	LPPIVAKEI	McPAS_TBA_VDJdb	Immunogenic peptide
CASSLWAGETEA	HLA-B*42:01	FPRPWLHGL	McPAS_TBA	Immunogenic peptide
CASSLWAGGPETQY	HLA-B*42:01	FPRPWLHGL	McPAS_TBA_VDJdb	Immunogenic peptide
CASSLWAGGSNEQ	HLA-B*42:01	FPRPWLHGL	McPAS_TBA	Immunogenic peptide
CASSLWAGPSNEQ	HLA-B*42:01	FPRPWLHGL	McPAS_TBA	Immunogenic peptide
CASSLWAGVSDTQY	HLA-B*42:01	FPRPWLHGL	McPAS_TBA_VDJdb	Immunogenic peptide
CASSLWDQETQY	HLA-B*42:01	FPRPWLHGL	McPAS_TBA_VDJdb	Immunogenic peptide
CASSLWGAKMNTEA	HLA-B*42:01	LPPIVAKEI	McPAS_TBA	Immunogenic peptide
CASSLWGGASNEQY	HLA-B*42:01	FPRPWLHGL	McPAS_TBA_VDJdb	Immunogenic peptide
CASSLWGGDFSQEQ	HLA-B*42:01	FPRPWLHGL	McPAS_TBA	Immunogenic peptide
CASSLWGGDFSQER	HLA-B*42:01	FPRPWLHGL	McPAS_TBA	Immunogenic peptide
CASSLWGGGDREQY	HLA-B*42:01	FPRPWLHGL	McPAS_TBA_VDJdb	Immunogenic peptide
CASSLWGGGFSQEQ	HLA-B*42:01	FPRPWLHGL	McPAS_TBA	Immunogenic peptide
CASSLWGGIADTQY	HLA-B*42:01	FPRPWLHGL	McPAS_TBA_VDJdb	Immunogenic peptide
CASSLWGGPTNEQY	HLA-B*42:01	FPRPWLHGL	McPAS_TBA_VDJdb	Immunogenic peptide
CASSLWGGSSNEQ	HLA-B*42:01	FPRPWLHGL	McPAS_TBA	Immunogenic peptide
CASSLWPGASNEQ	HLA-B*42:01	FPRPWLHGL	McPAS_TBA	Immunogenic peptide
CASSLWSGASNEQ	HLA-B*42:01	FPRPWLHGL	McPAS_TBA	Immunogenic peptide
CASSLWSGGADTQY	HLA-B*42:01	FPRPWLHGL	McPAS_TBA_VDJdb	Immunogenic peptide
CASSLWSGIADTQY	HLA-B*42:01	FPRPWLHGL	McPAS_TBA_VDJdb	Immunogenic peptide
CASSLWSGRADTQY	HLA-B*42:01	FPRPWLHGL	McPAS_TBA_VDJdb	Immunogenic peptide
CASSLWSGVGDGYT	HLA-B*42:01	FPRPWLHGL	McPAS_TBA_VDJdb	Immunogenic peptide
CASSLYAGPDQPQH	HLA-B*42:01	FPRPWLHGL	McPAS_TBA_VDJdb	Immunogenic peptide
CASSLYGGGDQPQH	HLA-B*42:01	FPRPWLHGL	McPAS_TBA_VDJdb	Immunogenic peptide
CASSLYGGGEQPQH	HLA-B*42:01	FPRPWLHGL	McPAS_TBA_VDJdb	Immunogenic peptide
CASSLYGGPEQPQH	HLA-B*42:01	FPRPWLHGL	McPAS_TBA_VDJdb	Immunogenic peptide
CASSLYGRGDQPQH	HLA-B*42:01	FPRPWLHGL	McPAS_TBA_VDJdb	Immunogenic peptide
CASSLYGSPDQPQH	HLA-B*42:01	FPRPWLHGL	McPAS_TBA_VDJdb	Immunogenic peptide
CASSLYHSPTDQPQH	HLA-B*42:01	FPRPWLHGL	McPAS_TBA_VDJdb	Immunogenic peptide
CASSLYLAPNEKL	HLA-B*42:01	FPRPWLHGL	McPAS_TBA	Immunogenic peptide
CASSLYSGADQPQH	HLA-B*42:01	FPRPWLHGL	McPAS_TBA_VDJdb	Immunogenic peptide
CASSLYSGAEQPQH	HLA-B*42:01	FPRPWLHGL	McPAS_TBA_VDJdb	Immunogenic peptide
CASSLYSGGDKEQY	HLA-B*42:01	FPRPWLHGL	McPAS_TBA_VDJdb	Immunogenic peptide
CASSLYSGGDQPQH	HLA-B*42:01	FPRPWLHGL	McPAS_TBA_VDJdb	Immunogenic peptide
CASSLYSGGGQPQH	HLA-B*42:01	FPRPWLHGL	McPAS_TBA_VDJdb	Immunogenic peptide
CASSLYSGLDQPQH	HLA-B*42:01	FPRPWLHGL	McPAS_TBA_VDJdb	Immunogenic peptide
CASSLYSGPDQPQH	HLA-B*42:01	FPRPWLHGL	McPAS_TBA_VDJdb	Immunogenic peptide
CASSLYSGYDQPQH	HLA-B*42:01	FPRPWLHGL	McPAS_TBA_VDJdb	Immunogenic peptide
CASSLYTGGDQPQH	HLA-B*42:01	FPRPWLHGL	McPAS_TBA_VDJdb	Immunogenic peptide
CASSLYTGSDQPQH	HLA-B*42:01	FPRPWLHGL	McPAS_TBA_VDJdb	Immunogenic peptide
CASSPARGTDTQY	HLA-B*42:01	FPRPWLHGL	McPAS_TBA_VDJdb	Immunogenic peptide
CASSPGNTEA	HLA-B*42:01	TPQDLNTML	McPAS_TBA	Immunogenic peptide
CASSPGQGQEQY	HLA-B*42:01	LPPIVAKEI	McPAS_TBA_VDJdb	Immunogenic peptide
CASSPGQGREQY	HLA-B*42:01	LPPIVAKEI	McPAS_TBA_VDJdb	Immunogenic peptide
CASSPIQGSEQY	HLA-B*42:01	LPPIVAKEI	McPAS_TBA_VDJdb	Immunogenic peptide
CASSPISDRSGNTIY	HLA-B*42:01	FPRPWLHGL	McPAS_TBA_VDJdb	Immunogenic peptide
CASSPNTIANEQ	HLA-B*42:01	TPGPGVRYPL	McPAS_TBA	Immunogenic peptide
CASSPPIPGTADTIY	HLA-B*42:01	TPGPGVRYPL	McPAS_TBA_VDJdb	Immunogenic peptide
CASSPRDRDFNYGYT	HLA-B*42:01	LPPIVAKEI	McPAS_TBA_VDJdb	Immunogenic peptide
CASSPRETRTDTQY	HLA-B*42:01	TPGPGVRYPL	McPAS_TBA_VDJdb	Immunogenic peptide
CASSPRGGGETQH	HLA-B*42:01	TPGPGVRYPL	McPAS_TBA	Immunogenic peptide
CASSPRGGGETQY	HLA-B*42:01	TPGPGVRYPL	McPAS_TBA_VDJdb	Immunogenic peptide
CASSPRGTRTDTQY	HLA-B*42:01	TPGPGVRYPL	McPAS_TBA_VDJdb	Immunogenic peptide
CASSPRQGHEQY	HLA-B*42:01	LPPIVAKEI	McPAS_TBA_VDJdb	Immunogenic peptide
CASSPRQGKEA	HLA-B*42:01	LPPIVAKEI	McPAS_TBA	Immunogenic peptide
CASSPRQGKEQ	HLA-B*42:01	LPPIVAKEI	McPAS_TBA	Immunogenic peptide
CASSPRQGLEGANVLT	HLA-B*42:01	LPPIVAKEI	McPAS_TBA_VDJdb	Immunogenic peptide
CASSPRQGQEQY	HLA-B*42:01	LPPIVAKEI	McPAS_TBA_VDJdb	Immunogenic peptide
CASSPRTGGTEA	HLA-B*42:01	LPPIVAKEI	McPAS_TBA	Immunogenic peptide
CASSPVGRGTEA	HLA-B*42:01	TPGPGVRYPL	McPAS_TBA	Immunogenic peptide
CASSQAASGNTIY	HLA-B*42:01	TPGPGVRYPL	McPAS_TBA_VDJdb	Immunogenic peptide
CASSQDHGGGTEA	HLA-B*42:01	FPRPWLHGL	McPAS_TBA	Immunogenic peptide
CASSQDMKGGSFTGEL	HLA-B*42:01	FPRPWLHGL	McPAS_TBA	Immunogenic peptide
CASSQDRATQETQY	HLA-B*42:01	TPGPGVRYPL	McPAS_TBA_VDJdb	Immunogenic peptide
CASSQDRGPDTQY	HLA-B*42:01	FPRPWLHGL	McPAS_TBA_VDJdb	Immunogenic peptide
CASSQDRREQY	HLA-B*42:01	FPRPWLHGL	McPAS_TBA_VDJdb	Immunogenic peptide
CASSQDRTSGNTIY	HLA-B*42:01	HPKVSSEVHI	McPAS_TBA_VDJdb	Immunogenic peptide
CASSQEGGGDGQPPH	HLA-B*42:01	TPQDLNTML	McPAS_TBA	Immunogenic peptide
CASSQEGGGDGQPQH	HLA-B*42:01	TPQDLNTML	McPAS_TBA_VDJdb	Immunogenic peptide
CASSQEGGGEGQPQH	HLA-B*42:01	TPQDLNTML	McPAS_TBA_VDJdb	Immunogenic peptide
CASSQEGGGGGQPQH	HLA-B*42:01	TPQDLNTML	McPAS_TBA_VDJdb	Immunogenic peptide
CASSQEGGPAEQ	HLA-B*42:01	FPRPWLHGL	McPAS_TBA	Immunogenic peptide
CASSQEGRRDTQY	HLA-B*42:01	TPGPGVRYPL	McPAS_TBA_VDJdb	Immunogenic peptide
CASSQEGWDGRYEQY	HLA-B*42:01	HPKVSSEVHI	McPAS_TBA_VDJdb	Immunogenic peptide
CASSQENRQGRYEQY	HLA-B*42:01	HPKVSSEVHI	McPAS_TBA_VDJdb	Immunogenic peptide
CASSQFTGTQETQY	HLA-B*42:01	TPGPGVRYPL	McPAS_TBA_VDJdb	Immunogenic peptide
CASSQGPTEA	HLA-B*42:01	TPQDLNTML	McPAS_TBA	Immunogenic peptide
CASSQGQSSYEQY	HLA-B*42:01	FPRPWLHGL	McPAS_TBA_VDJdb	Immunogenic peptide
CASSQRGADTEA	HLA-B*42:01	TPGPGVRYPL	McPAS_TBA	Immunogenic peptide
CASSQYRATQETQY	HLA-B*42:01	TPGPGVRYPL	McPAS_TBA_VDJdb	Immunogenic peptide
CASSREGYSNQPQH	HLA-B*42:01	TPQDLNTML	McPAS_TBA_VDJdb	Immunogenic peptide
CASSRGNTIY	HLA-B*42:01	HPKVSSEVHI	McPAS_TBA_VDJdb	Immunogenic peptide
CASSRSGLYEQY	HLA-B*42:01	LPPIVAKEI	McPAS_TBA_VDJdb	Immunogenic peptide
CASSSAITGMGDSGNTIY	HLA-B*42:01	TPQDLNTML	McPAS_TBA_VDJdb	Immunogenic peptide
CASSSFRDGGTDTQY	HLA-B*42:01	HPKVSSEVHI	McPAS_TBA_VDJdb	Immunogenic peptide
CASSSKDGQSQY	HLA-B*42:01	LPPIVAKEI	McPAS_TBA_VDJdb	Immunogenic peptide
CASSSLGPPGEQY	HLA-B*42:01	LPPIVAKEI	McPAS_TBA_VDJdb	Immunogenic peptide
CASSSQTSGLFANTGEL	HLA-B*42:01	TPQDLNTML	McPAS_TBA	Immunogenic peptide
CASSSRDGQEQY	HLA-B*42:01	LPPIVAKEI	McPAS_TBA_VDJdb	Immunogenic peptide
CASSSRGGQEQY	HLA-B*42:01	LPPIVAKEI	McPAS_TBA_VDJdb	Immunogenic peptide
CASSSRQGKEA	HLA-B*42:01	LPPIVAKEI	McPAS_TBA	Immunogenic peptide
CASSSRQGKEQY	HLA-B*42:01	LPPIVAKEI	McPAS_TBA_VDJdb	Immunogenic peptide
CASSSRQSKEA	HLA-B*42:01	LPPIVAKEI	McPAS_TBA	Immunogenic peptide
CASSSTITGMGDSGNTIY	HLA-B*42:01	TPQDLNTML	McPAS_TBA_VDJdb	Immunogenic peptide
CASSSTITGMGVSGNTIY	HLA-B*42:01	TPQDLNTML	McPAS_TBA_VDJdb	Immunogenic peptide
CASSSTRQSPYNEQ	HLA-B*42:01	HPKVSSEVHI	McPAS_TBA	Immunogenic peptide
CASSSTWGTGEL	HLA-B*42:01	HPKVSSEVHI	McPAS_TBA	Immunogenic peptide
CASSSVDRNSYEQY	HLA-B*42:01	FPRPWLHGL	McPAS_TBA_VDJdb	Immunogenic peptide
CASSSVDRSSYEQY	HLA-B*42:01	FPRPWLHGL	McPAS_TBA_VDJdb	Immunogenic peptide
CASSSVGPPGEL	HLA-B*42:01	LPPIVAKEI	McPAS_TBA	Immunogenic peptide
CASSTFGATQEIQY	HLA-B*42:01	TPGPGVRYPL	McPAS_TBA_VDJdb	Immunogenic peptide
CASSTFGATQETQY	HLA-B*42:01	TPGPGVRYPL	McPAS_TBA_VDJdb	Immunogenic peptide
CASSTTTGNTEA	HLA-B*42:01	HPKVSSEVHI	McPAS_TBA	Immunogenic peptide
CASSVAGGQVTDTQY	HLA-B*42:01	TPGPGVRYPL	McPAS_TBA_VDJdb	Immunogenic peptide
CASSVDKGGADEQ	HLA-B*42:01	IIKDYGKQM	McPAS_TBA	Immunogenic peptide
CASSVDKGGPDTQY	HLA-B*42:01	IIKDYGKQM	McPAS_TBA_VDJdb	Immunogenic peptide
CASSVDKGGTDAQY	HLA-B*42:01	IIKDYGKQM	McPAS_TBA_VDJdb	Immunogenic peptide
CASSVDKGGTDEQ	HLA-B*42:01	IIKDYGKQM	McPAS_TBA	Immunogenic peptide
CASSVDKGGTDTQY	HLA-B*42:01	IIKDYGKQM	McPAS_TBA_VDJdb	Immunogenic peptide
CASSVDKGGVDEQ	HLA-B*42:01	IIKDYGKQM	McPAS_TBA	Immunogenic peptide
CASSVFGGPDQPQH	HLA-B*42:01	FPRPWLHGL	McPAS_TBA_VDJdb	Immunogenic peptide
CASSVGPNEQ	HLA-B*42:01	TPQDLNTML	McPAS_TBA	Immunogenic peptide
CASSVSAIYNEQ	HLA-B*42:01	LPPIVAKEI	McPAS_TBA	Immunogenic peptide
CASSVSGGQVTDTQY	HLA-B*42:01	TPGPGVRYPL	McPAS_TBA_VDJdb	Immunogenic peptide
CASSVVGGGAADTQY	HLA-B*42:01	TPGPGVRYPL	McPAS_TBA_VDJdb	Immunogenic peptide
CASSVWGDPSYEQY	HLA-B*42:01	TPGPGVRYPL	McPAS_TBA_VDJdb	Immunogenic peptide
CASSWTETGEL	HLA-B*42:01	TPQDLNTML	McPAS_TBA	Immunogenic peptide
CASSWTGPPGEQ	HLA-B*42:01	LPPIVAKEI	McPAS_TBA	Immunogenic peptide
CASSYRVTEA	HLA-B*42:01	TPGPGVRYPL	McPAS_TBA	Immunogenic peptide
CASSYSRAPKLENIQY	HLA-B*42:01	TPGPGVRYPL	McPAS_TBA_VDJdb	Immunogenic peptide
CASSYSRTDLKNIQY	HLA-B*42:01	TPGPGVRYPL	McPAS_TBA_VDJdb	Immunogenic peptide
CASSYYSGGSSYNEQ	HLA-B*42:01	TPGPGVRYPL	McPAS_TBA	Immunogenic peptide
CASSYYSGGTTYNEQ	HLA-B*42:01	TPGPGVRYPL	McPAS_TBA	Immunogenic peptide
CASTLDRLA	HLA-B*42:01	HPKVSSEVHI	McPAS_TBA	Immunogenic peptide
CASTTAADTQY	HLA-B*42:01	TPGPGVRYPL	McPAS_TBA_VDJdb	Immunogenic peptide
CASYRSDRPTEA	HLA-B*42:01	TPGPGVRYPL	McPAS_TBA	Immunogenic peptide
CATHAGTGEL	HLA-B*42:01	TPQDLNTML	McPAS_TBA	Immunogenic peptide
CATRGRGSEETQY	HLA-B*42:01	HPKVSSEVHI	McPAS_TBA_VDJdb	Immunogenic peptide
CATSDSYEQY	HLA-B*42:01	IIKDYGKQM	McPAS_TBA_VDJdb	Immunogenic peptide
CATSERGGMETQY	HLA-B*42:01	TPGPGVRYPL	McPAS_TBA_VDJdb	Immunogenic peptide
CATSPRGGAVEQ	HLA-B*42:01	TPGPGVRYPL	McPAS_TBA	Immunogenic peptide
CATSRDRETGGDYGYT	HLA-B*42:01	FPRPWLHGL	McPAS_TBA_VDJdb	Immunogenic peptide
CATSRSGLAGKDTQY	HLA-B*42:01	LPPIVAKEI	McPAS_TBA_VDJdb	Immunogenic peptide
CPSSPRGGGETQY	HLA-B*42:01	TPGPGVRYPL	McPAS_TBA	Immunogenic peptide
CSAADRASGIEQY	HLA-B*42:01	HPKVSSEVHI	McPAS_TBA_VDJdb	Immunogenic peptide
CSAGDWANNEQ	HLA-B*42:01	FPRPWLHGL	McPAS_TBA	Immunogenic peptide
CSAPEPTSGRWSGEL	HLA-B*42:01	TPGPGVRYPL	McPAS_TBA	Immunogenic peptide
CSAREDEGWGGYT	HLA-B*42:01	IIKDYGKQM	McPAS_TBA_VDJdb	Immunogenic peptide
CSARGGQLQETQY	HLA-B*42:01	FPRPWLHGL	McPAS_TBA_VDJdb	Immunogenic peptide
CSARGGTSIFYT	HLA-B*42:01	HPKVSSEVHI	McPAS_TBA_VDJdb	Immunogenic peptide
CSARGLGVNTEA	HLA-B*42:01	LPPIVAKEI	McPAS_TBA	Immunogenic peptide
CSARRFPEA	HLA-B*42:01	HPKVSSEVHI	McPAS_TBA	Immunogenic peptide
CSARTYAGGTDTQY	HLA-B*42:01	FPRPWLHGL	McPAS_TBA_VDJdb	Immunogenic peptide
CSATARQGGMEQY	HLA-B*42:01	HPKVSSEVHI	McPAS_TBA_VDJdb	Immunogenic peptide
CSATDRASGIEQY	HLA-B*42:01	HPKVSSEVHI	McPAS_TBA_VDJdb	Immunogenic peptide
CSATDRDGGLEQY	HLA-B*42:01	HPKVSSEVHI	McPAS_TBA_VDJdb	Immunogenic peptide
[truncated: 146,069 more rows]
