# Supplementary material for: The T cell receptor β chain repertoire of tumor infiltrating lymphocytes improves neoantigen prediction and prioritization
Source: eLife. 2024 Oct 28;13:RP94658. doi: 10.7554/eLife.94658 (PMC11517254; doi:10.7554/eLife.94658)
Supplement: Supplementary file 4. [file elife-94658-supp4.xlsx]

## Sheet: Sheet1
Supplementary file 1d: Performance of combined model in an independent dataset
TCR_model	True positive	True Negative	False positive	False negative
pMTNet	21	1	0	82
NetTCR	0	1	0	103
