# Supplementary material for: The T cell receptor β chain repertoire of tumor infiltrating lymphocytes improves neoantigen prediction and prioritization
Source: eLife. 2024 Oct 28;13:RP94658. doi: 10.7554/eLife.94658 (PMC11517254; doi:10.7554/eLife.94658)
Supplement: Supplementary file 5. [file elife-94658-supp5.xlsx]

## Sheet: Sheet1
Supplementary file 1e: Clinical Characteristics of 28 CRC patients
No.	Patient ID	Age	Gender	Tumor_location	Stage	Microsatellite_status	Metastasis	Number of tumor	Tumor size (cmxcm)
1	PT01	63	Male	Proximal	II	MSI-H	NA	1	6x6
2	PT02	67	Female	Proximal	III	MSS	Yes	1	4x4
3	PT03	74	Female	Proximal	II	MSS	No	1	7x5
4	PT04	78	Male	Proximal	III	MSS	NA	1	4x4
5	PT05	85	Male	Proximal	II	MSS	Yes	1	5x3
6	PT06	59	Male	Proximal	II	MSI-H	NA	1	6x6
7	PT07	43	Female	Proximal	II	MSI-H	No	1	4x4
8	PT08	69	Female	Proximal	II	MSS	No	1	6x4,5
9	PT09	66	Female	Proximal	II	MSS	No	1	3x2.5
10	PT10	36	Female	Proximal	III	MSS	No	1	3x3
11	PT11	63	Female	Distal	II	MSS	NA	1	7x4
12	PT12	70	Male	Proximal	III	MSS	No	1	4x4
13	PT13	68	Male	Proximal	II	MSS	No	1	4x3
14	PT14	60	Male	Proximal	III	MSS	Yes	1	4x3
15	PT15	86	Female	Distal	II	MSI-H	No	1	4x3
16	PT16	63	Male	Proximal	III	MSS	Yes	1	5x4
17	PT17	70	Female	Distal	III	MSS	NA	1	4x4
18	PT18	81	Female	Proximal	II	MSS	No	1	3x3
19	PT19	57	Male	Proximal	II	MSS	No	1	3x3
20	PT20	72	Male	Distal	III	MSS	Yes	1	4.5x4
21	PT21	52	Female	Proximal	III	MSS	No	1	8x4
22	PT22	80	Female	Proximal	II	MSS	No	1	4x4
23	PT23	60	Male	Distal	II	MSS	Yes	2	2x3, 1x1
24	PT24	63	Female	Proximal	III	MSS	No	1	3x2
25	PT25	57	Female	Proximal	II	MSS	No	1	5x5
26	PT26	56	Male	Proximal	II	MSS	NA	1	7x4
27	PT27	53	Male	Proximal	II	MSS	No	1	5x5
28	PT28	71	Female	Distal	III	MSS	No	1	5x5
